# Supplementary material for: Convergent integration of two self-labor domino sequences: a novel method for the synthesis of oxazole derivatives from methyl ketones and benzoins
Source: Royal Society of Chemistry journal article supplement (doi:10.1039/c2cc18077d), 2012-01-01
Supplement: c2cc18077d.pdf [file c2cc18077d.pdf]

## Supporting Information

Weijian Xue, Qi Li, Yanping Zhu, Jungang Wang and Anxin Wu \*

*Key Laboratory of Pesticide & Chemical Biology, Ministry of Education, Central China Normal University, 152 Luoyu Road, Wuhan 430079, P. R. China and <sup>b</sup>Department of Chemistry, Wuhan University, Wuhan 430072, P. R. China*

E-mail: chwuax@mail.ccnu.edu.cn

| Table of Contents                                                               | Pages   |
|---------------------------------------------------------------------------------|---------|
| 1. General                                                                      | S2      |
| 2. General procedure for the synthesis of polysubstituted oxazoles ( <b>3</b> ) | S2-S7   |
| 3. The X-ray crystal structures                                                 | S8-S9   |
| 4. Mechanism for the for the formation of two types of oxazoles                 | S10     |
| 5. Intermediates reaction                                                       | S11     |
| 6. The spectra of GC-MS                                                         | S12-S13 |
| 7. NMR analysis                                                                 | S14     |
| 8. <sup>1</sup> H and <sup>13</sup> C NMR spectra                               | S15-S35 |
| 9. HRMS spectra                                                                 | S36-S56 |

## 1. General

All starting materials and catalysts were obtained commercially, and used without further purification. Whenever possible, reactions were monitored by thin-layer chromatography using polygram SIL G/UV254 0.2 mm silica gel plates with fluorescent indicator. Column chromatography: silica gel 200–300 mesh.

NMR spectra were measured on Varian Mercury 400 spectrometer operating at 400 MHz for  $^1\text{H}$  and 100 MHz for  $^{13}\text{C}$  relative to tetramethylsilane as internal standard. NMR spectra were measured on Varian NMR System 600MHz operating at 600 MHz for  $^1\text{H}$  and 125 MHz for  $^{13}\text{C}$  relative to tetramethylsilane as internal standard. HRMS were carried out on an apex-Ultra spectrometer. IR spectra were recorded on a Tensor 27 infrared spectrometer as KBr pellets with absorption reported in  $\text{cm}^{-1}$ . The X-ray crystal structures were obtained on a Bruker SMART APEX CCD system. GC-MS were recorded on a Termo DSQ II. Melting points were determined using a melting point apparatus and are uncorrected.

## 2. General procedure for the synthesis of polysubstituted oxazoles (3)

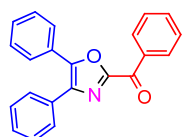

**(4,5-diphenyloxazol-2-yl)(phenyl)methanone (3a).** To a stirred solution of acetophenone (120mg, 1mmol), benzoin (233mg, 1.1mmol) and  $\text{CH}_3\text{COONH}_4$  (154 mg, 2mmol) in DMSO (3mL) were added  $\text{I}_2$  (635mg, 2.5mmol). The reaction mixture was stirred at  $120^\circ\text{C}$  for 5 h. EtOAc and  $\text{H}_2\text{O}/\text{Na}_2\text{S}_2\text{O}_3$  saturated solution were added, and the organic layer was separated, dried ( $\text{Na}_2\text{SO}_4$ ), and concentrated under reduced pressure. The residue was purified by flash chromatography (silica gel, 100/1=petroleum ether/ethylacetate) to give **3a** (237mg, 73% yield): mp=121.2-124.8; IR spectrum (KBr  $\text{cm}^{-1}$ ) 1655, 1513, 1477, 1335, 1204, 1181, 913, 767;  $^1\text{H}$  NMR (400 MHz,  $\text{CDCl}_3$ )  $\delta$  (ppm) 8.70 (d,  $J = 8$  Hz, 2H), 8.71 (q,  $J = 2.4$  Hz, 4H), 7.61 (t,  $J = 7.2$  Hz, 1H), 7.51 (t,  $J = 8$  Hz, 2H), 7.38 (t,  $J = 5.6$  Hz, 6H);  $^{13}\text{C}$  NMR (100MHz,  $\text{CDCl}_3$ )  $\delta$  (ppm) 178.5, 155.8, 148.5, 137.2, 135.2, 133.7, 131.5, 130.9, 129.8, 128.7, 128.6 128.4, 128.1, 127.6, 127.3. HRMS (ESI):  $m/z$   $[\text{M}+\text{H}]^+$  calcd for  $\text{C}_{22}\text{H}_{16}\text{NO}_2$ : 326.11756; found: 326.11734.

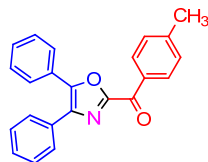

**(4,5-diphenyloxazol-2-yl)(p-tolyl)methanone (3b)** (251mg, 74% yield): mp=157.7-160.2; IR spectrum (KBr  $\text{cm}^{-1}$ ) 1650, 1604, 1510, 1477, 1445, 1334, 1178, 911, 767;  $^1\text{H}$  NMR (400 MHz,  $\text{CDCl}_3$ )  $\delta$  (ppm) 8.49 (d,  $J = 8$  Hz, 2H), 7.75-7.72 (m, 4H), 7.42(t,  $J = 6$  Hz, 6H), 7.33 (d,  $J = 8$  Hz, 2H), 2.45(s, 3H);  $^{13}\text{C}$  NMR (100MHz,  $\text{CDCl}_3$ )  $\delta$  (ppm) 178.3, 156.1, 148.4, 144.9, 137.2, 132.8, 131.6, 131.1, 129.7, 129.2, 128.8, 128.7, 128.2, 127.7, 127.3, 21.8. HRMS (ESI):  $m/z$   $[\text{M}+\text{H}]^+$  calcd for  $\text{C}_{23}\text{H}_{18}\text{NO}_2$ : 340.13321; found: 340.13296.

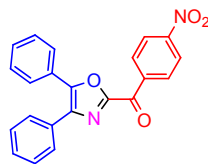

**(4,5-diphenyloxazol-2-yl)(4-nitrophenyl)methanone (3c)** (259mg, 70%

yield): mp=154.6-158.8; IR spectrum (KBr  $\text{cm}^{-1}$ ) 1657, 1599, 1580, 1521, 1445, 1346, 1333, 1207, 916, 850, 769, 696;  $^1\text{H}$  NMR (400 MHz,  $\text{CDCl}_3$ )  $\delta$  (ppm) 8.77 (d,  $J = 8$  Hz, 2H), 8.37 (d,  $J = 8$  Hz, 2H) 7.76-7.70 (m, 4H), 7.44(q,  $J = 4.8$  Hz, 6H);  $^{13}\text{C}$  NMR (100MHz,  $\text{CDCl}_3$ )  $\delta$  (ppm) 176.6, 155.4, 150.5, 149.5, 139.9, 137.8, 132.0, 131.1, 130.2, 129.1, 128.9, 128.8, 128.2, 127.4, 127.2, 123.5. HRMS (ESI):  $m/z$   $[\text{M}+\text{H}]^+$  calcd for  $\text{C}_{22}\text{H}_{15}\text{N}_2\text{O}_4$ : 371.10263; found: 371.10230.

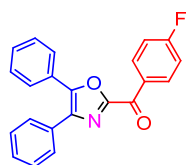

**(4,5-diphenyloxazol-2-yl)(4-fluorophenyl)methanone (3d)** (257mg, 75%

yield): mp=149.6-152.4; IR spectrum (KBr  $\text{cm}^{-1}$ ) 1656, 1593, 1502, 1477, 1336, 1202, 1155, 915, 767, 693;  $^1\text{H}$  NMR (400 MHz,  $\text{CDCl}_3$ )  $\delta$  (ppm) 8.70-8.66 (m, 2H), 7.75-7.71 (m, 4H) 7.46-7.40 (m, 6H), 7.21 (t,  $J = 7.2$  Hz, 2H);  $^{13}\text{C}$  NMR (100MHz,  $\text{CDCl}_3$ )  $\delta$  (ppm) 176.9, 167.6, 165.0, 155.7, 148.7, 137.3, 133.9, 133.8, 131.6, 131.4, 129.9, 128.8, 128.7, 128.2, 127.6, 127.3, 115.8, 115.6. HRMS (ESI):  $m/z$   $[\text{M}+\text{H}]^+$  calcd for  $\text{C}_{22}\text{H}_{15}\text{FNO}_2$ : 344.10813; found: 344.10793.

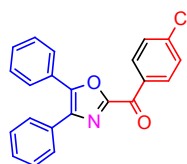

**(4-chlorophenyl)(4,5-diphenyloxazol-2-yl)methanone (3e)** (273mg, 76%

yield): mp=155.2-157.5; IR spectrum (KBr  $\text{cm}^{-1}$ ) 1649, 1584, 1476, 1335, 1210, 1090, 910, 768, 698;  $^1\text{H}$  NMR (400 MHz,  $\text{CDCl}_3$ )  $\delta$  (ppm) 8.56 (d,  $J = 8$  Hz, 2H), 7.74-7.70 (m, 4H), 7.50 (d,  $J = 8$  Hz, 2H), 7.45-7.40 (m, 6H);  $^{13}\text{C}$  NMR (100MHz,  $\text{CDCl}_3$ )  $\delta$  (ppm) 177.2, 155.7, 148.8, 140.5, 137.4, 133.5, 132.4, 131.4, 129.9, 128.8, 128.8, 128.7, 128.2, 127.5, 127.3. HRMS (ESI):  $m/z$   $[\text{M}+\text{H}]^+$  calcd for  $\text{C}_{22}\text{H}_{15}\text{ClNO}_2$ : 360.07858; found: 360.07840.

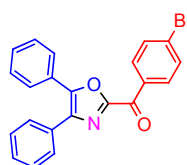

**(4-bromophenyl)(4,5-diphenyloxazol-2-yl)methanone (3f)** (323mg, 80%

yield): mp=149.5-152.6; IR spectrum (KBr  $\text{cm}^{-1}$ ) 1648, 1581, 1476, 1335, 1211, 909, 767, 698;  $^1\text{H}$  NMR (400 MHz,  $\text{CDCl}_3$ )  $\delta$  (ppm) 8.48 (d,  $J = 8$  Hz, 2H), 7.75-7.67 (m, 6H), 7.45-7.41 (m, 6H);  $^{13}\text{C}$  NMR (100MHz,  $\text{CDCl}_3$ )  $\delta$  (ppm) 177.4, 155.7, 148.9, 137.4, 133.9, 132.4, 131.8, 131.4, 129.9, 129.4, 128.8, 128.7, 128.2, 127.5, 127.4. HRMS (ESI):  $m/z$   $[\text{M}+\text{H}]^+$  calcd for  $\text{C}_{22}\text{H}_{15}\text{BrNO}_2$ : 404.02807; found: 404.02773.

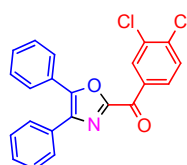

**(3,4-dichlorophenyl)(4,5-diphenyloxazol-2-yl)methanone (3g)** (264mg, 67%

yield): mp=138.7-141.3; IR spectrum (KBr  $\text{cm}^{-1}$ ) 1650, 1552, 1509, 1445, 1337, 1206, 1187, 928, 768, 697;  $^1\text{H}$  NMR (400 MHz,  $\text{CDCl}_3$ )  $\delta$  (ppm) 8.71 (d,  $J = 2$  Hz, 1H), 8.51 (q,  $J = 2$  Hz, 1H), 7.72 (t,  $J = 8$  Hz, 4H), 7.61 (d,  $J = 8$  Hz, 1H), 7.43 (t,  $J = 6$  Hz, 6H);  $^{13}\text{C}$  NMR (100MHz,  $\text{CDCl}_3$ )  $\delta$  (ppm) 175.9, 155.3, 149.2, 138.5, 137.5, 134.8, 134.7, 133.1, 132.7, 131.2, 130.6, 130.1, 129.9, 128.9, 128.8, 128.7, 128.4, 128.2, 127.4. HRMS (ESI):  $m/z$   $[\text{M}+\text{H}]^+$  calcd for  $\text{C}_{22}\text{H}_{14}\text{Cl}_2\text{NO}_2$ : 394.03961; found: 394.03928.

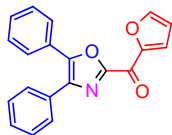

**(4,5-diphenyloxazol-2-yl)(furan-2-yl)methanone (3h)** (268mg, 85% yield): mp=167.1-169.4; IR spectrum (KBr  $\text{cm}^{-1}$ ) 1648, 1519, 1460, 1393, 1022, 864, 772, 696;  $^1\text{H}$  NMR (400 MHz,  $\text{CDCl}_3$ )  $\delta$  (ppm) 8.24 (d,  $J = 3.2$  Hz, 1H), 7.80 (s, 1H), 7.75-7.72 (m, 4H), 7.42 (t,  $J = 6.4$  Hz, 6H), 6.66 (q,  $J = 1.6$  Hz, 1H);  $^{13}\text{C}$  NMR (100MHz,  $\text{CDCl}_3$ )  $\delta$  (ppm) 165.6, 155.1, 150.2, 148.8, 148.7, 137.3, 131.4, 129.8, 128.8, 128.7, 128.1, 127.5, 127.3, 124.1, 112.7. HRMS (ESI):  $m/z$   $[\text{M}+\text{H}]^+$  calcd for  $\text{C}_{20}\text{H}_{14}\text{NO}_3$ : 316.09682; found: 316.09656.

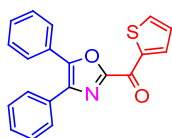

**(4,5-diphenyloxazol-2-yl)(thiophen-2-yl)methanone (3i)** (275mg, 83% yield): mp=163.7-165.8; IR spectrum (KBr  $\text{cm}^{-1}$ ) 1631, 1514, 1412, 1356, 1215, 1048, 831, 772, 697;  $^1\text{H}$  NMR (400 MHz,  $\text{CDCl}_3$ )  $\delta$  (ppm) 8.70 (d,  $J = 4$  Hz, 1H), 7.79 (d,  $J = 4.8$  Hz, 1H), 7.75 (d,  $J = 6.4$  Hz, 4H), 7.43 (q,  $J = 6$  Hz, 6H), 7.23 (t,  $J = 4$  Hz, 1H);  $^{13}\text{C}$  NMR (100MHz,  $\text{CDCl}_3$ )  $\delta$  (ppm) 170.6, 155.5, 148.8, 140.8, 137.3, 137.0, 136.2, 131.5, 129.9, 128.8, 128.7, 128.5, 128.1, 127.7, 127.4. HRMS (ESI):  $m/z$   $[\text{M}+\text{H}]^+$  calcd for  $\text{C}_{20}\text{H}_{14}\text{NO}_2\text{S}$ : 332.07398; found: 332.07382.

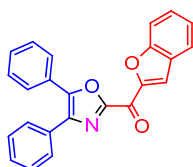

**benzofuran-2-yl(4,5-diphenyloxazol-2-yl)methanone (3j)** (183mg, 50% yield): mp=181.3-186.2; IR spectrum (KBr  $\text{cm}^{-1}$ ) 1649, 1547, 1519, 1445, 1340, 1120, 890, 753, 664;  $^1\text{H}$  NMR (400 MHz,  $\text{CDCl}_3$ )  $\delta$  (ppm) 8.65 (s, 1H), 7.79 (d,  $J = 4.8$  Hz, 1H), 7.81 (d,  $J = 8$  Hz, 1H), 7.72 (d,  $J = 6$  Hz, 4H), 7.67 (d,  $J = 8$  Hz, 1H), 7.40 (t,  $J = 8$  Hz, 1H), 7.49-7.42 (m, 6H), 7.36 (t,  $J = 8$  Hz, 1H);  $^{13}\text{C}$  NMR (100MHz,  $\text{CDCl}_3$ )  $\delta$  (ppm) 167.3, 156.4, 155.2, 150.3, 149.2, 137.5, 131.4, 130.0, 129.2, 128.9, 128.8, 128.7, 128.2, 127.5, 127.4, 127.3, 124.1, 124.0, 120.1, 112.6. HRMS (ESI):  $m/z$   $[\text{M}+\text{H}]^+$  calcd for  $\text{C}_{24}\text{H}_{16}\text{NO}_3$ : 366.11247; found: 366.11189.

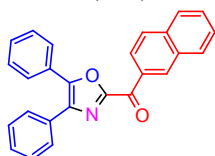

**(4,5-diphenyloxazol-2-yl)(naphthalen-2-yl)methanone (3l)** (233mg, 64% yield): mp=178.1-181.7; IR spectrum (KBr  $\text{cm}^{-1}$ ) 1646, 1513, 1443, 1332, 1180, 1119, 763, 691;  $^1\text{H}$  NMR (400 MHz,  $\text{CDCl}_3$ )  $\delta$  (ppm) 9.33 (s, 1H), 8.48 (q,  $J = 1.6$  Hz, 1H), 8.50 (d,  $J = 8$  Hz, 1H), 7.96 (d,  $J = 8$  Hz, 1H), 7.90 (d,  $J = 8$  Hz, 1H), 7.77 (q,  $J = 2$  Hz, 4H), 7.63 (t,  $J = 8$  Hz, 1H), 7.57 (d,  $J = 8$  Hz, 1H), 7.47-7.42 (m, 6H);  $^{13}\text{C}$  NMR (100MHz,  $\text{CDCl}_3$ )  $\delta$  (ppm) 178.4, 156.1, 148.6, 137.3, 135.9, 133.9, 132.5, 132.4, 131.6, 130.2, 129.8, 128.9, 128.8, 128.7, 128.6, 128.2, 127.7, 127.4.

126.7, 125.6. HRMS (ESI):  $m/z$   $[M+H]^+$  calcd for  $C_{26}H_{18}NO_2$ : 376.13321; found: 376.13307.

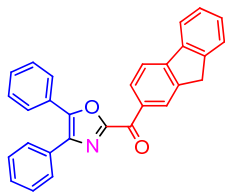

**(4,5-diphenyloxazol-2-yl)(9H-fluoren-2-yl)methanone (3m)** (214mg, 52% yield): mp=201.8-203.7; IR spectrum (KBr  $cm^{-1}$ ) 1645, 1611, 1511, 1476, 1444, 1334, 1203, 1124, 766, 693;  $^1H$  NMR (400 MHz,  $CDCl_3$ )  $\delta$  (ppm) 8.71 (q,  $J = 8$  Hz, 2H), 7.87 (q,  $J = 8$  Hz, 2H), 7.74 (s, 4H), 7.58 (d,  $J = 7.2$  Hz, 1H), 7.40 (d,  $J = 6.4$  Hz, 8H), 3.98 (s, 2H);  $^{13}C$  NMR (100MHz,  $CDCl_3$ )  $\delta$  (ppm) 178.3, 156.2, 148.5, 147.2, 144.8, 143.1, 140.4, 137.2, 133.6, 131.7, 130.6, 129.7, 128.8, 128.7, 128.6, 127.7, 127.5, 127.3, 127.0, 125.2, 121.1, 119.6, 37.0. HRMS (ESI):  $m/z$   $[M+H]^+$  calcd for  $C_{29}H_{20}NO_2$ : 414.14886; found: 414.14872.

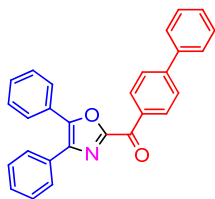

**[1,1'-biphenyl]-4-yl(4,5-diphenyloxazol-2-yl)methanone (3n)** (208mg, 52% yield): mp=166.8-171.3; IR spectrum (KBr  $cm^{-1}$ ) 1646, 1601, 1512, 1477, 1444, 1336, 1181, 913, 771, 749, 694;  $^1H$  NMR (400 MHz,  $CDCl_3$ )  $\delta$  (ppm) 8.67 (d,  $J = 8$  Hz, 2H), 7.76 (t,  $J = 8$  Hz, 6H), 7.67 (d,  $J = 8$  Hz, 2H), 7.51-7.43 (m, 9H);  $^{13}C$  NMR (100MHz,  $CDCl_3$ )  $\delta$  (ppm) 178.1, 156.0, 148.6, 146.4, 139.8, 137.3, 134.0, 131.6, 129.8, 128.9, 128.8, 128.7, 128.3, 128.2, 127.7, 127.3, 127.1. HRMS (ESI):  $m/z$   $[M+H]^+$  calcd for  $C_{28}H_{20}NO_2$ : 402.14886; found: 402.14862.

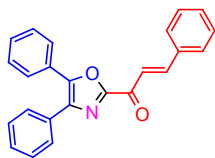

**(E)-1-(4,5-diphenyloxazol-2-yl)-3-phenylprop-2-en-1-one (3o)** (246mg, 70% yield): mp=154.0-157.5; IR spectrum (KBr  $cm^{-1}$ ) 1665, , 1605, 1574, 1511, 1475, 1444, 1352, 1077, 1049, 771, 693;  $^1H$  NMR (400 MHz,  $CDCl_3$ )  $\delta$  (ppm) 8.05 (d,  $J = 16$  Hz, 1H), 7.91 (d,  $J = 16$  Hz, 1H), 7.73 (t,  $J = 6$  Hz, 6H), 7.47-7.40 (m, 9H);  $^{13}C$  NMR (100MHz,  $CDCl_3$ )  $\delta$  (ppm) 176.1, 157.2, 149.0, 145.8, 137.5, 134.4, 131.5, 131.1, 130.4, 129.8, 128.9, 128.8, 128.7, 128.2, 127.6, 127.3, 121.3. HRMS (ESI):  $m/z$   $[M+H]^+$  calcd for  $C_{24}H_{18}NO_2$ : 352.13321; found: 352.13298.

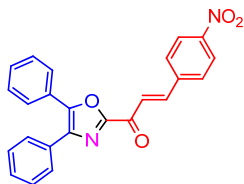

**(E)-1-(4,5-diphenyloxazol-2-yl)-3-(4-nitrophenyl)prop-2-en-1-one (3p)** (293mg, 74% yield): mp=162.1-166.1; IR spectrum (KBr  $cm^{-1}$ ) 1669, 1612, 1593, 1519, 1476, 1445, 1342, 1048, 778, 691;  $^1H$  NMR (400 MHz,  $CDCl_3$ )  $\delta$  (ppm) 8.29 (d,  $J = 8$  Hz, 2H), 8.03 (s, 2H), 7.86 (d,  $J = 8$  Hz, 2H), 7.72 (t,  $J = 8$  Hz, 4H), 7.47-7.41(m, 6H);  $^{13}C$  NMR (100MHz,  $CDCl_3$ )  $\delta$  (ppm) 175.4, 156.8, 149.6, 148.7, 142.2, 140.4, 137.8, 131.2, 130.1, 129.4, 129.0, 128.9, 128.8, 128.2, 127.3, 127.2, 125.1, 124.1. HRMS (ESI):  $m/z$   $[M+H]^+$  calcd for  $C_{24}H_{17}N_2O_4$ : 397.11828 ; found: 397.11771.

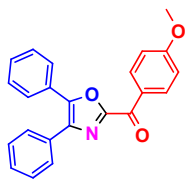

**(4,5-diphenyloxazol-2-yl)(4-methoxyphenyl)methanone (3q)** (188mg, 53% yield): mp=144.2-148.4; IR spectrum (KBr  $\text{cm}^{-1}$ ) 1646, 1592, 1506, 1338, 1260, 1213, 1169, 913, 771, 697;  $^1\text{H}$  NMR (400 MHz,  $\text{CDCl}_3$ )  $\delta$  (ppm) 8.64 (d,  $J = 8$  Hz, 2H), 7.73 (d,  $J = 5.2$  Hz, 4H), 7.45-7.40 (m, 6H), 7.01 (d,  $J = 8$  Hz, 2H), 3.90 (s, 3H);  $^{13}\text{C}$  NMR (100MHz,  $\text{CDCl}_3$ )  $\delta$  (ppm) 177.0, 164.2, 156.1, 148.2, 137.0, 133.4, 131.6, 129.7, 128.7, 128.6, 128.2, 127.7, 127.3, 113.7, 55.5. HRMS (ESI):  $m/z$   $[\text{M}+\text{H}]^+$  calcd for  $\text{C}_{23}\text{H}_{18}\text{NO}_3$ : 356.12812 ; found: 356.12787.

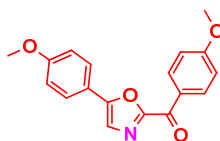

**(4-methoxyphenyl)(5-(4-methoxyphenyl)oxazol-2-yl)methanone (4q)** (59mg, 38% yield): mp=151.0-153.5; IR spectrum (KBr  $\text{cm}^{-1}$ ) 1644, 1599, 1566, 1482, 1424, 1306, 1248, 1158, 1023, 905, 828, 634;  $^1\text{H}$  NMR (400 MHz,  $\text{CDCl}_3$ )  $\delta$  (ppm) 8.53 (d,  $J = 8.8$  Hz, 2H), 7.76 (d,  $J = 8.8$  Hz, 2H), 7.47 (s, 1H), 7.00 (t,  $J = 8.8$  Hz, 4H), 3.90 (s, 3H), 3.86(s, 3H);  $^{13}\text{C}$  NMR (100MHz,  $\text{CDCl}_3$ )  $\delta$  (ppm) 177.0, 164.1, 160.1, 156.8, 154.0, 133.2, 128.3, 127.0, 122.3, 119.5, 114.5, 113.7, 55.5, 55.4. HRMS (ESI):  $m/z$   $[\text{M}+\text{H}]^+$  calcd for  $\text{C}_{18}\text{H}_{16}\text{NO}_4$ : 310.10738 ; found: 310.10709.

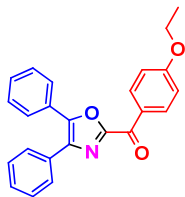

**(4,5-diphenyloxazol-2-yl)(4-ethoxyphenyl)methanone (3r)** (203mg, 55% yield): mp=141.8-144.7; IR spectrum (KBr  $\text{cm}^{-1}$ ) 1649, 1601, 1572, 1259, 1171, 1156, 913, 772, 694;  $^1\text{H}$  NMR (400 MHz,  $\text{CDCl}_3$ )  $\delta$  (ppm) 8.63 (d,  $J = 8.8$  Hz, 2H), 7.73 (d,  $J = 5.6$  Hz, 4H), 7.44-7.40 (m, 6H), 7.00 (d,  $J = 8.8$  Hz, 2H), 4.15 (d,  $J = 7.6$  Hz, 2H), 1.47 (t,  $J = 6.8$  Hz, 3H);  $^{13}\text{C}$  NMR (100MHz,  $\text{CDCl}_3$ )  $\delta$  (ppm) 177.0, 163.7, 156.2, 148.2, 137.0, 133.5, 131.7, 129.7, 128.8, 128.7, 128.2, 128.0, 127.8, 127.3, 114.2, 63.8, 14.6. HRMS (ESI):  $m/z$   $[\text{M}+\text{H}]^+$  calcd for  $\text{C}_{24}\text{H}_{20}\text{NO}_3$ : 370.14377 ; found: 370.14344.

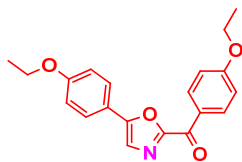

**(4-ethoxyphenyl)(5-(4-ethoxyphenyl)oxazol-2-yl)methanone (4r)** (67mg, 40% yield): mp=128.1-135.4; IR spectrum (KBr  $\text{cm}^{-1}$ ) 1638, 1613, 1590, 1476, 1360, 1248, 1157, 1046, 1027, 1004, 829, 636;  $^1\text{H}$  NMR (400 MHz,  $\text{CDCl}_3$ )  $\delta$  (ppm) 8.43 (d,  $J = 8.4$  Hz, 2H), 7.64 (d,  $J = 8.8$  Hz, 2H), 6.87 (t,  $J = 8.8$  Hz, 4H), 4.04-3.97 (m, 4H), 1.34(q,  $J = 6.4$  Hz, 6H);  $^{13}\text{C}$  NMR (100MHz,  $\text{CDCl}_3$ )  $\delta$  (ppm) 176.9, 163.5, 160.2, 156.7, 154.0, 133.2, 128.0, 126.9, 122.2, 119.2, 114.9, 114.1, 63.7, 63.5, 14.6, 14.5. HRMS (ESI):  $m/z$   $[\text{M}+\text{H}]^+$  calcd for  $\text{C}_{20}\text{H}_{20}\text{NO}_4$ : 338.13868 ; found: 338.13844.

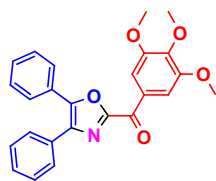

**(4,5-diphenyloxazol-2-yl)(3,4,5-trimethoxyphenyl)methanone (3s)** (207mg, 50% yield): mp=155.1-159.4; IR spectrum (KBr  $\text{cm}^{-1}$ ) 1656, 1582, 1503, 1474, 1416, 1372, 1344, 1244, 1167, 1126, 995, 771, 698;  $^1\text{H}$  NMR (600 MHz,  $\text{CDCl}_3$ )  $\delta$  (ppm) 8.01 (s, 2H), 7.73 (t,  $J = 9$  Hz, 4H), 7.35 (t,  $J = 7.8$  Hz, 6H), 3.97 (d,  $J = 3$  Hz, 9H);  $^{13}\text{C}$  NMR (125 MHz,  $\text{CDCl}_3$ )  $\delta$  (ppm) 177.0, 156.0, 152.8, 148.5, 143.4, 137.0, 131.6, 130.1, 129.9, 128.8, 128.7, 128.0, 127.9, 127.7, 127.5, 127.3, 108.6, 60.9, 56.3, 56.2. HRMS (ESI):  $m/z$   $[\text{M}+\text{H}]^+$  calcd for  $\text{C}_{25}\text{H}_{22}\text{NO}_5$ : 416.14925 ; found: 416.15032.

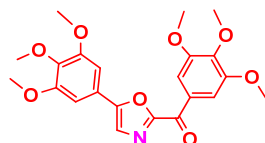

**(3,4,5-trimethoxyphenyl)(4-(3,4,5-trimethoxyphenyl)oxazol-2-yl)methanone (4s)** (88mg, 41% yield): mp=192.9-194.4; IR spectrum (KBr  $\text{cm}^{-1}$ ) 1644, 1583, 1486, 1454, 1416, 1356, 1321, 1238, 1131, 991, 770, 662;  $^1\text{H}$  NMR (400 MHz,  $\text{CDCl}_3$ )  $\delta$  (ppm) 7.89 (s, 2H), 7.55 (s, 1H), 7.03 (s, 2H), 3.97 (t,  $J = 6$  Hz, 12H), 3.92 (s, 6H);  $^{13}\text{C}$  NMR (100MHz,  $\text{CDCl}_3$ )  $\delta$  (ppm) 177.0, 156.9, 154.0, 153.8, 152.8, 143.4, 139.7, 130.1, 123.5, 122.1, 108.4, 102.6, 61.0, 56.3, 56.2. HRMS (ESI):  $m/z$   $[\text{M}+\text{H}]^+$  calcd for  $\text{C}_{22}\text{H}_{24}\text{NO}_8$ : 430.14964 ; found: 430.15036.

### 3. The X-ray crystal structures

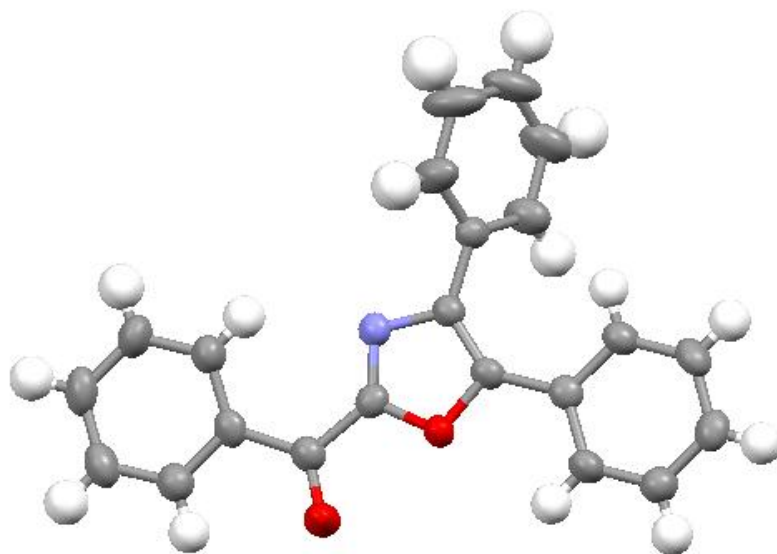

**Figure S 1.** Crystal structure of **3a** (some disordered parts were omitted for clarity).

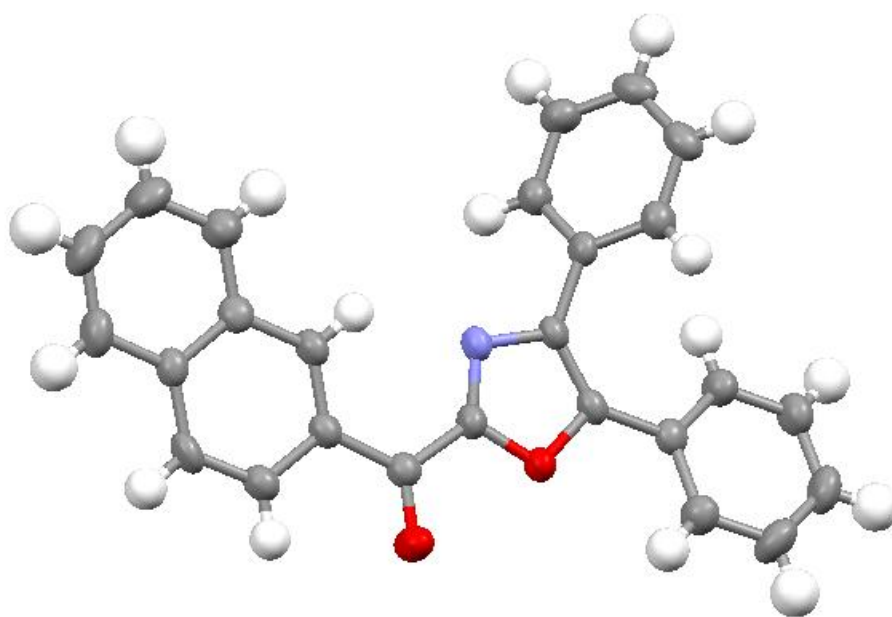

**Figure S 2.** Crystal structure of **3l**.



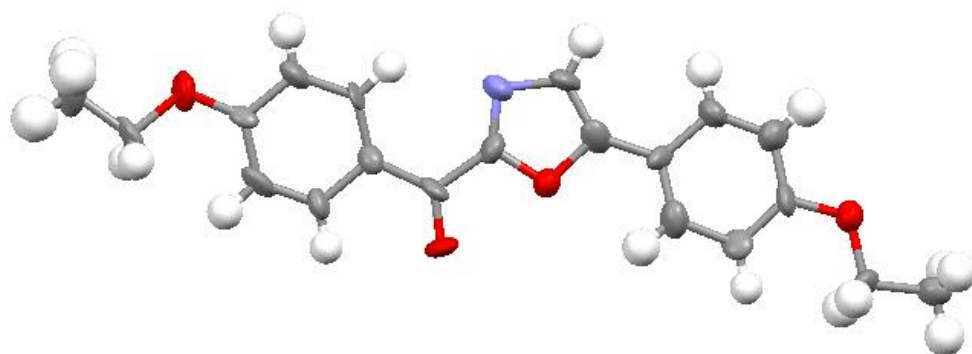

**Figure S 3.** Crystal structure of **4r**.

#### 4. Mechanism for the for the formation of two types of oxazoles

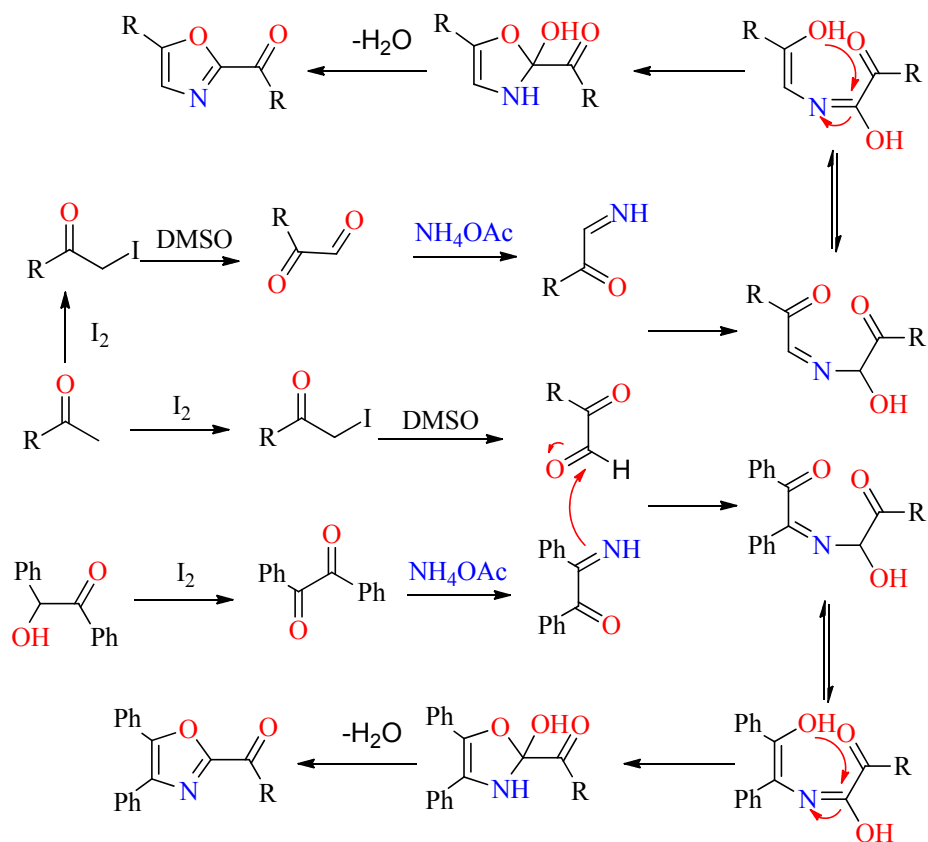

Figure S 4 Mechanism for the for the formation of two types of oxazoles.

When the aromatic rings bind electron-donating groups, aryl methyl ketones are faster to transform into phenylglyoxal than the formation of **7**. Phenylglyoxal can react with itself and **7** for the formation of oxazoles **4** and **3**. Contrary to this, when the aromatic rings don't bind electron-donating groups, the formation of **7** is faster than phenylglyoxal. Phenylglyoxal can react with **7** for the formation of oxazoles **3**. Yet **4** is less for isolated.

## 5. Intermediates reaction

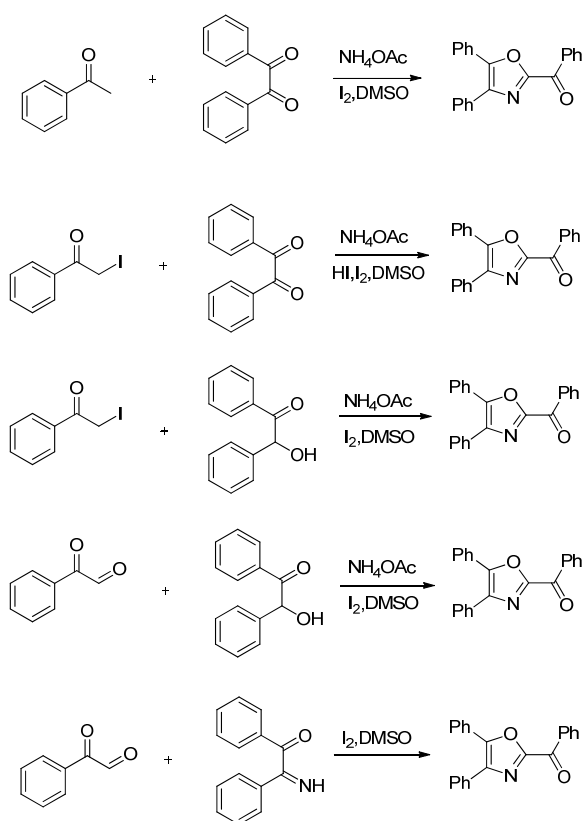

Figure S 5 Intermediates reaction

In order to prove that the reaction mechanism, we used **1a** with **5**, **6a** and **5**, **6a** with **2**, **8a** with **2** and **8a** with **7** to synthesize **3a**. Fortunately, we get **3a** from the above reactions.

## 6. The spectra of GC-MS

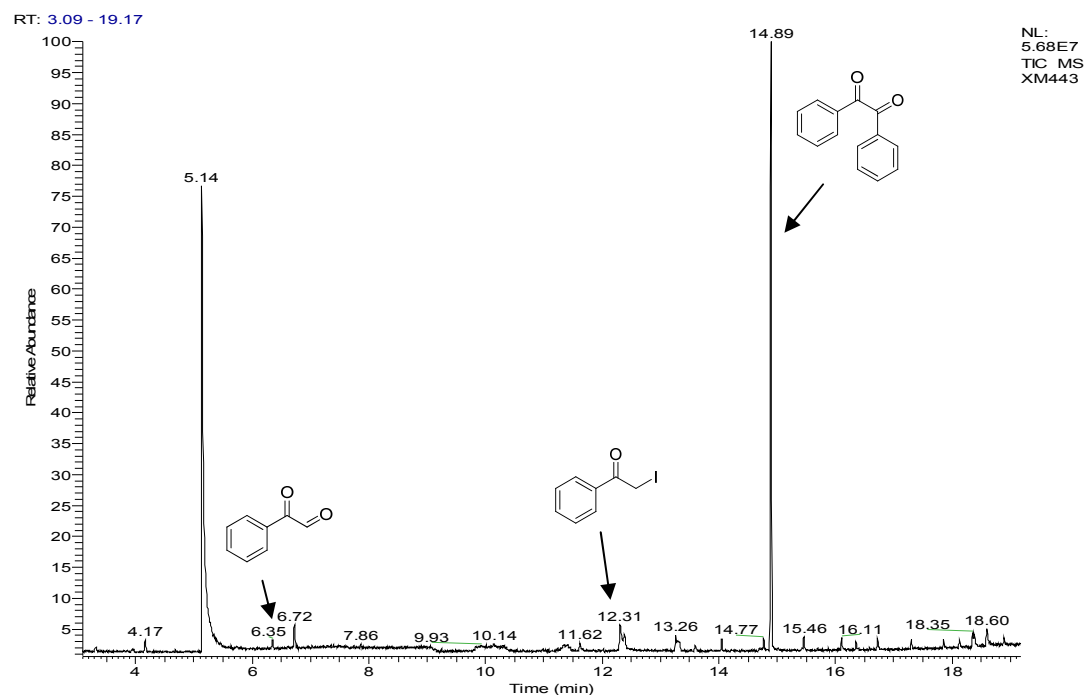

Figure S 6 GC-MS of the reaction.

The reaction mixture was stirred at 120 °C for 0.5h, CHCl<sub>3</sub> and H<sub>2</sub>O/Na<sub>2</sub>S<sub>2</sub>O<sub>3</sub> saturated solution were added, and the organic layer was separated to detect intermediates. From the spectrogram, we get the peaks of 4a, 6a and 5 which prove the reaction mechanism.

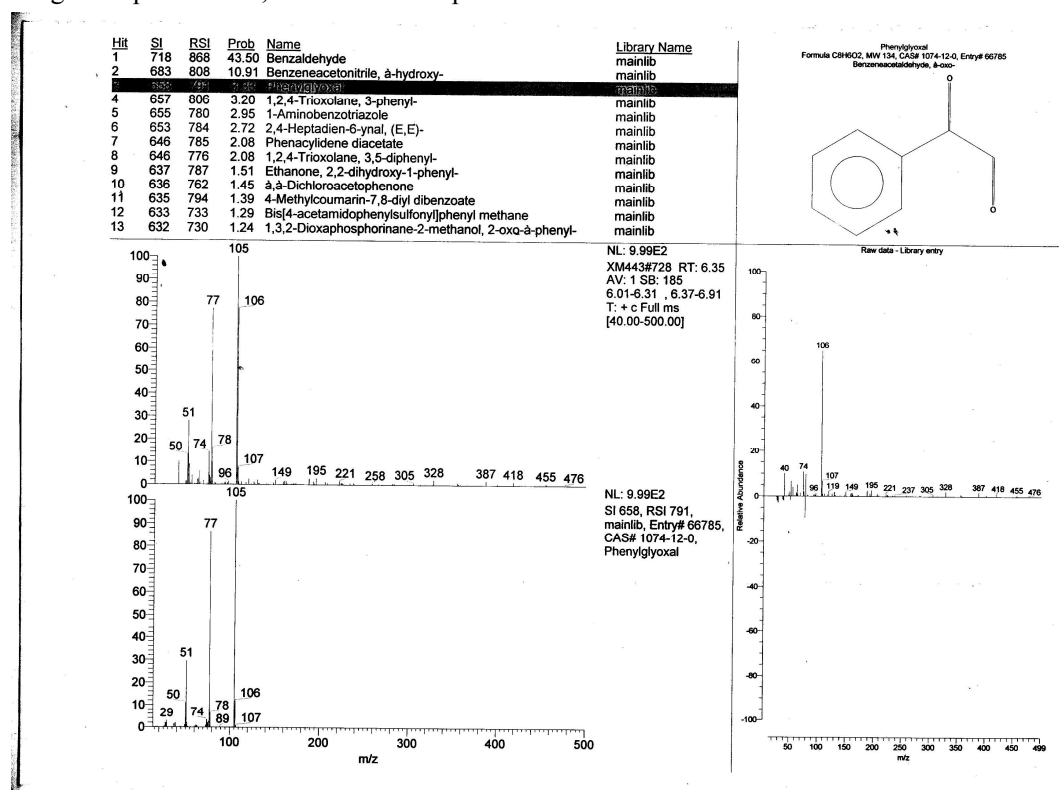

Figure S 7 GC-MS of the reaction.

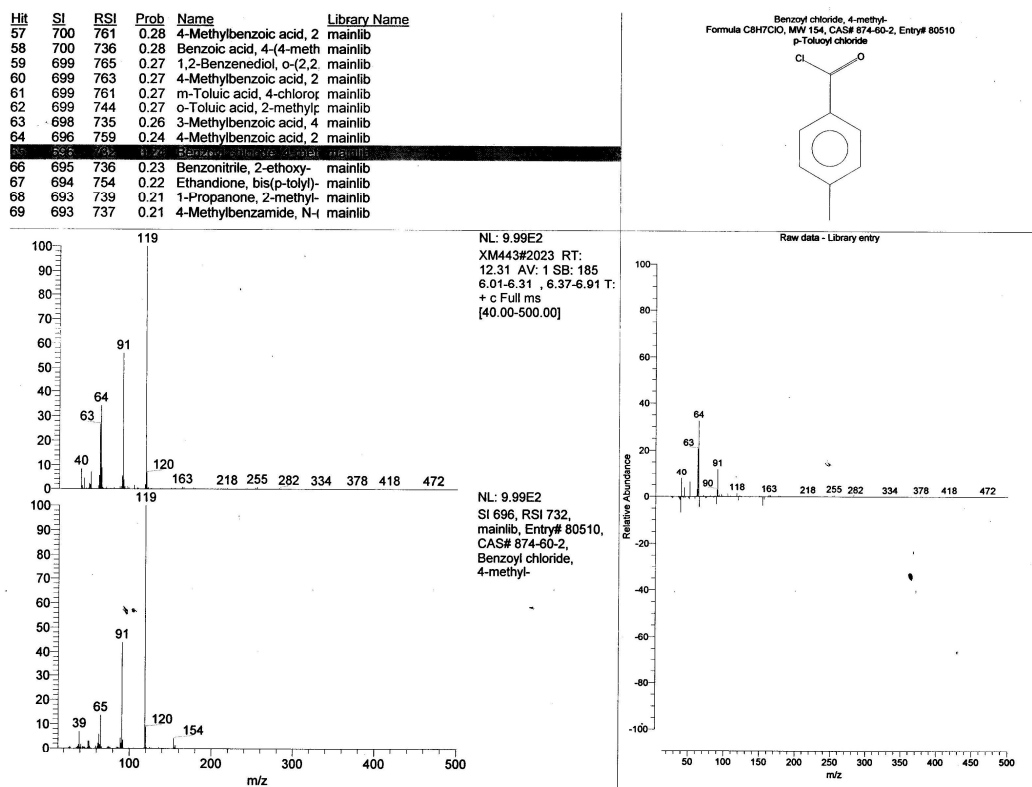

Figure S 8 GC-MS of the reaction.

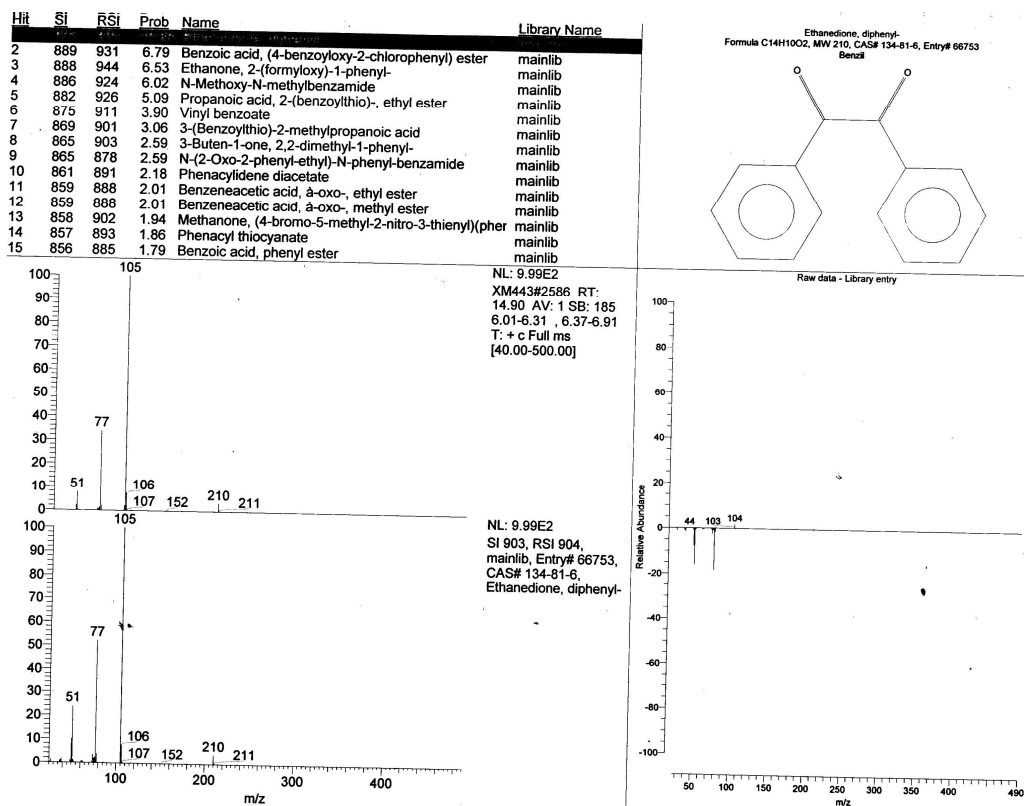

Figure S 9 GC-MS of the reaction.

## 7. NMR analysis

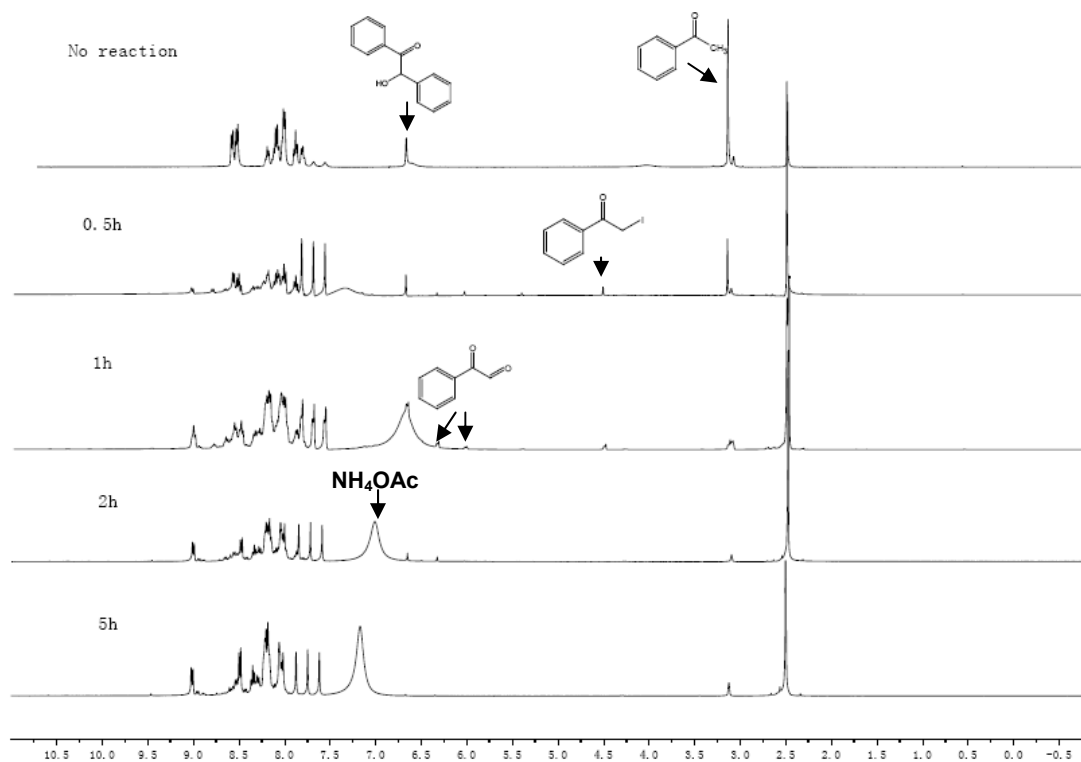

**Figure S 10** NMR of the reaction.

From the NMR of the reaction, we also get the peaks of 6a and 8a which prove the reaction mechanism.

### 8. $^1\text{H}$ and $^{13}\text{C}$ NMR spectra $^1\text{H}$ and $^{13}\text{C}$ NMR spectra

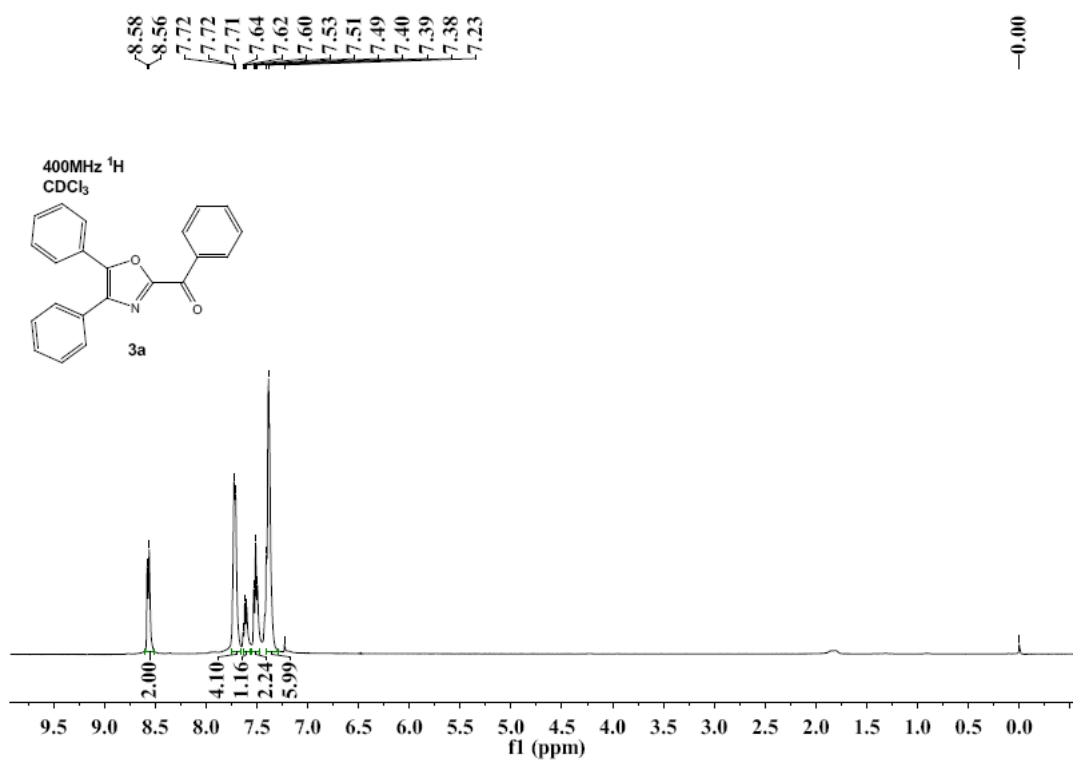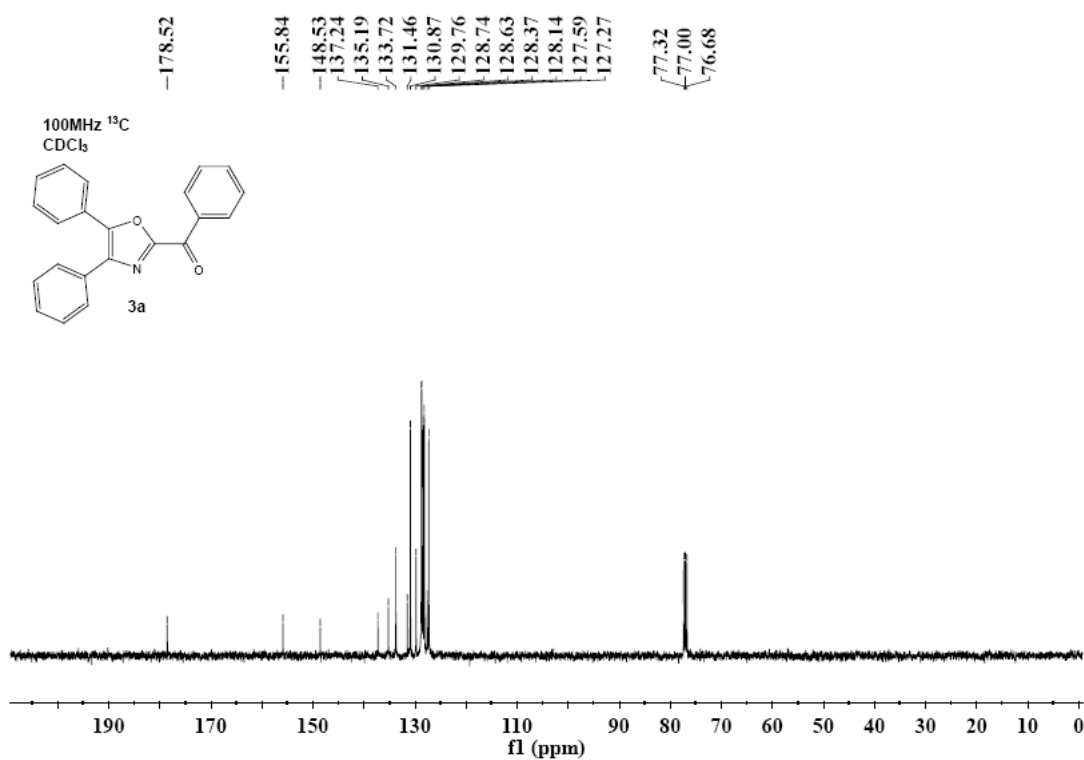

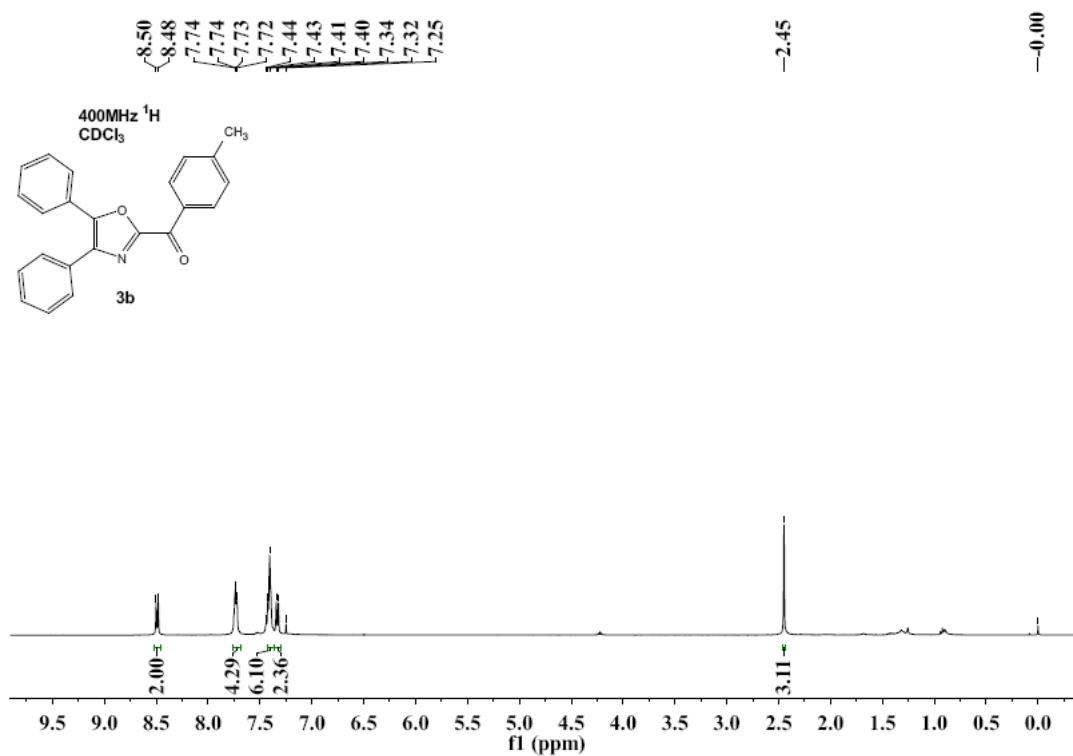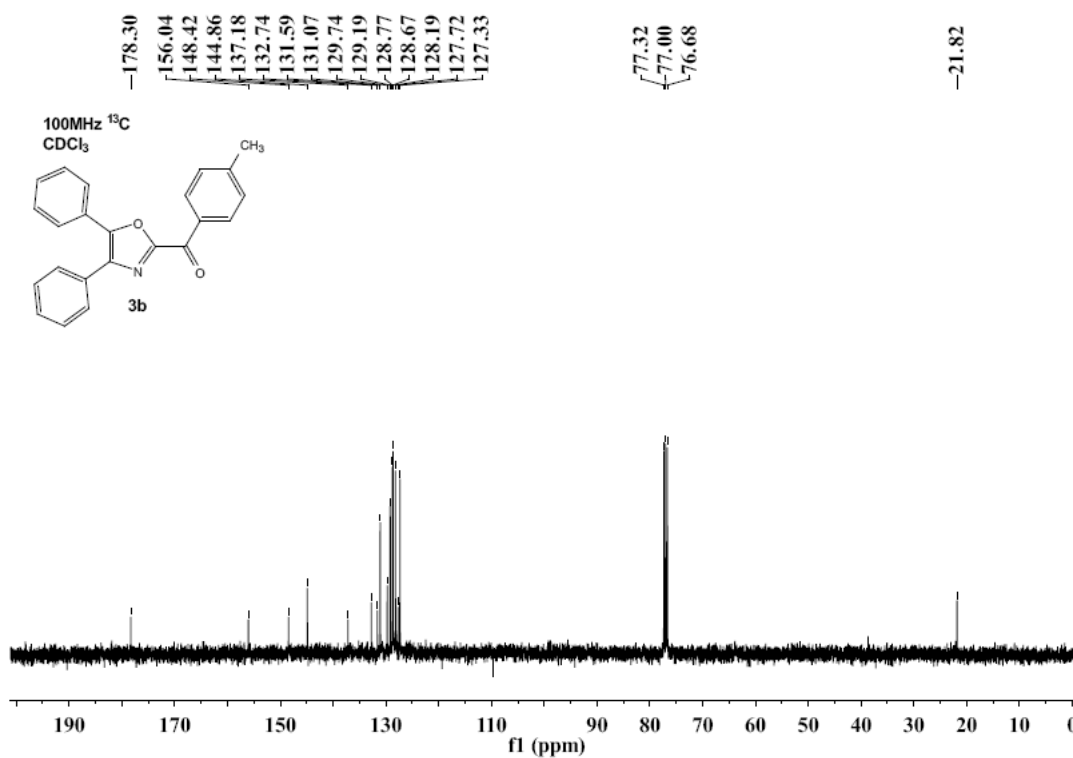



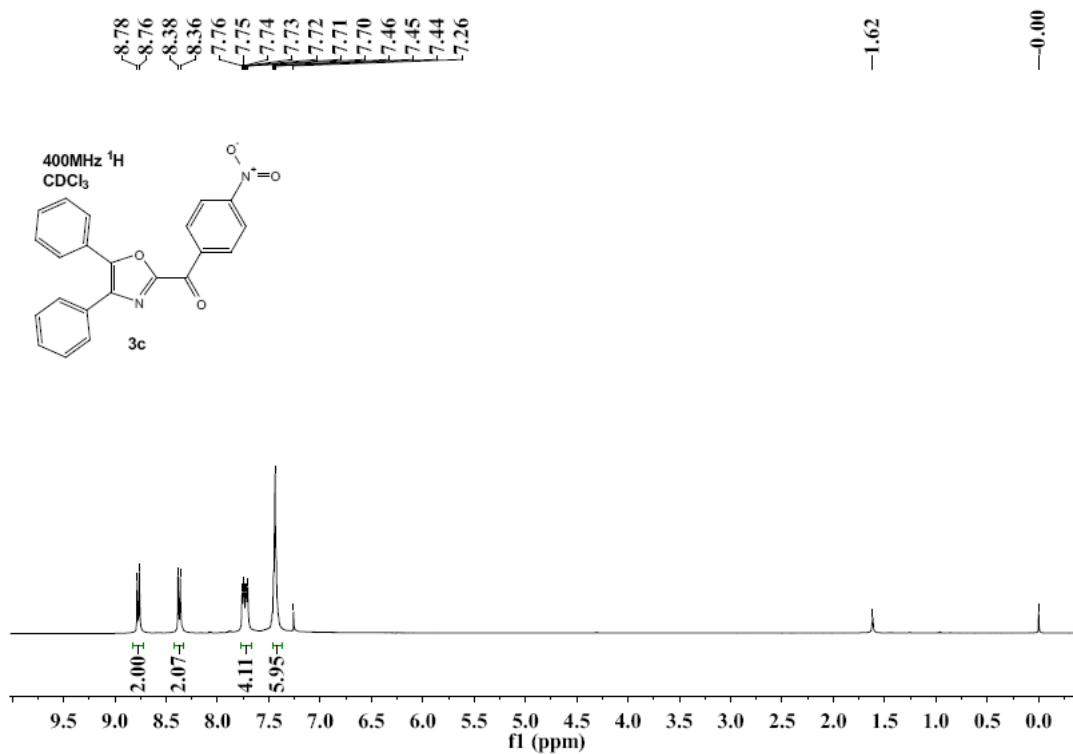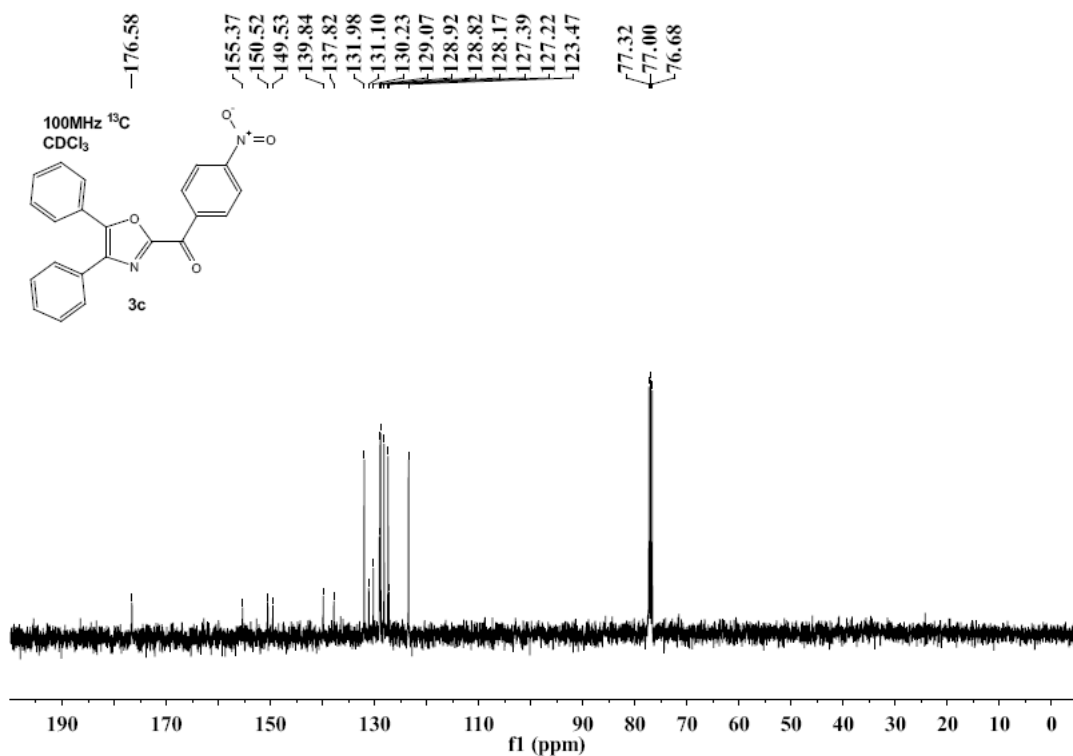

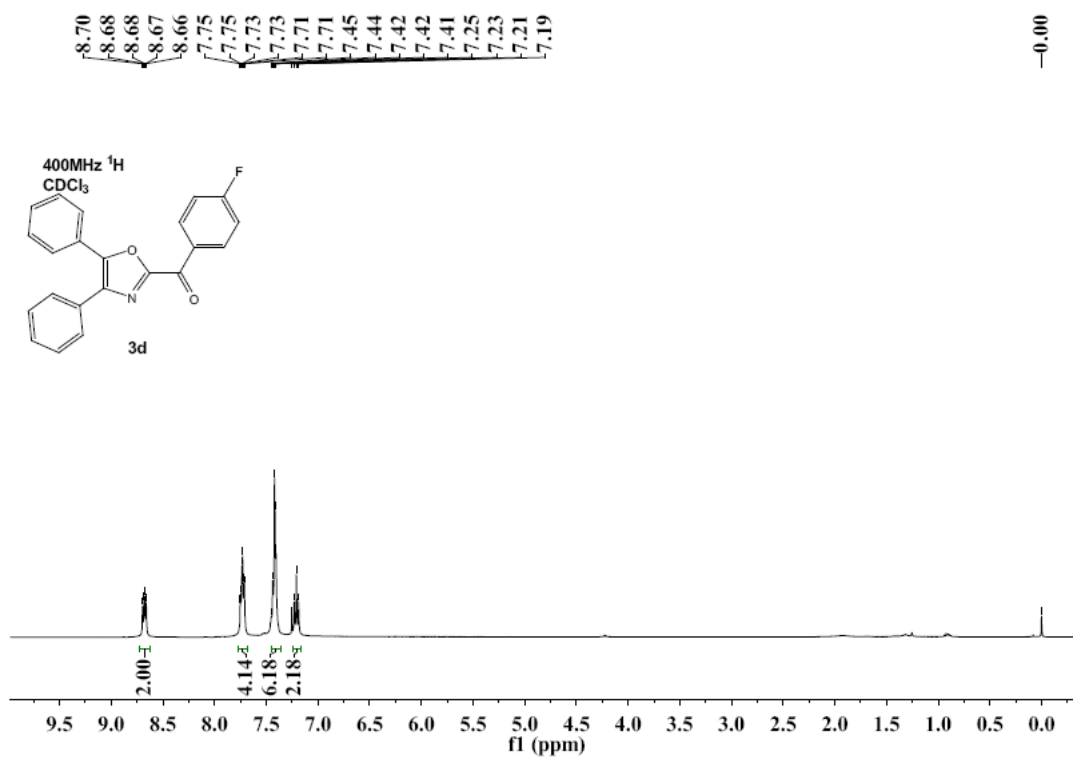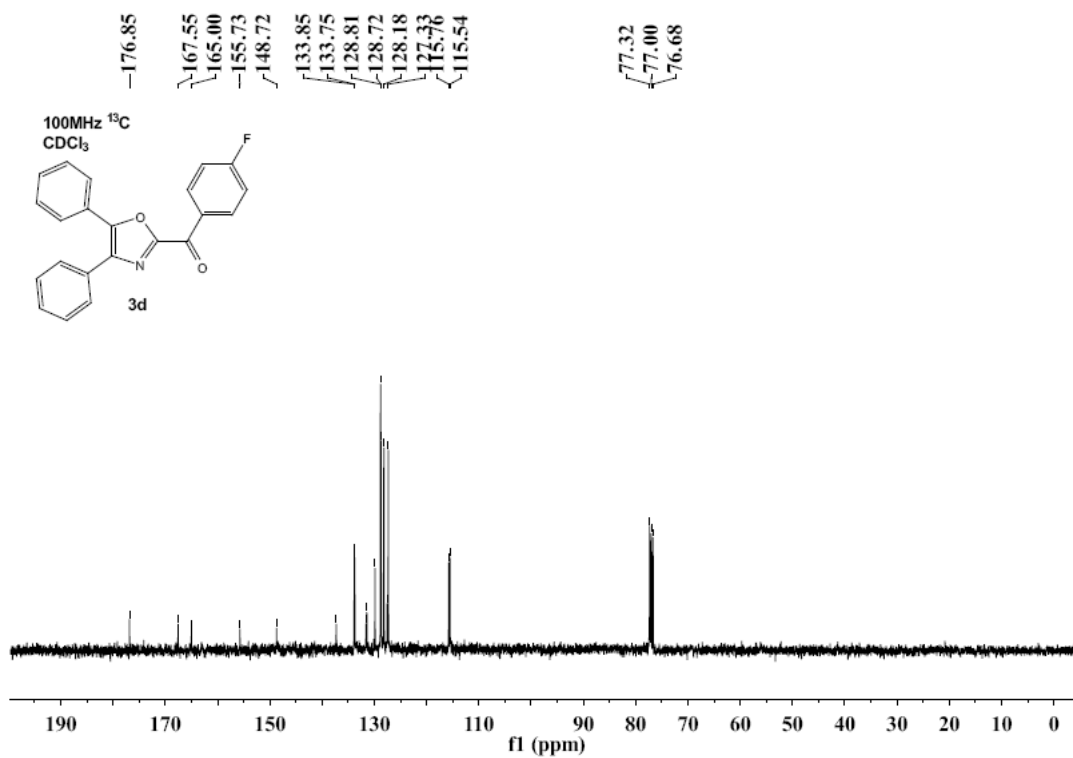

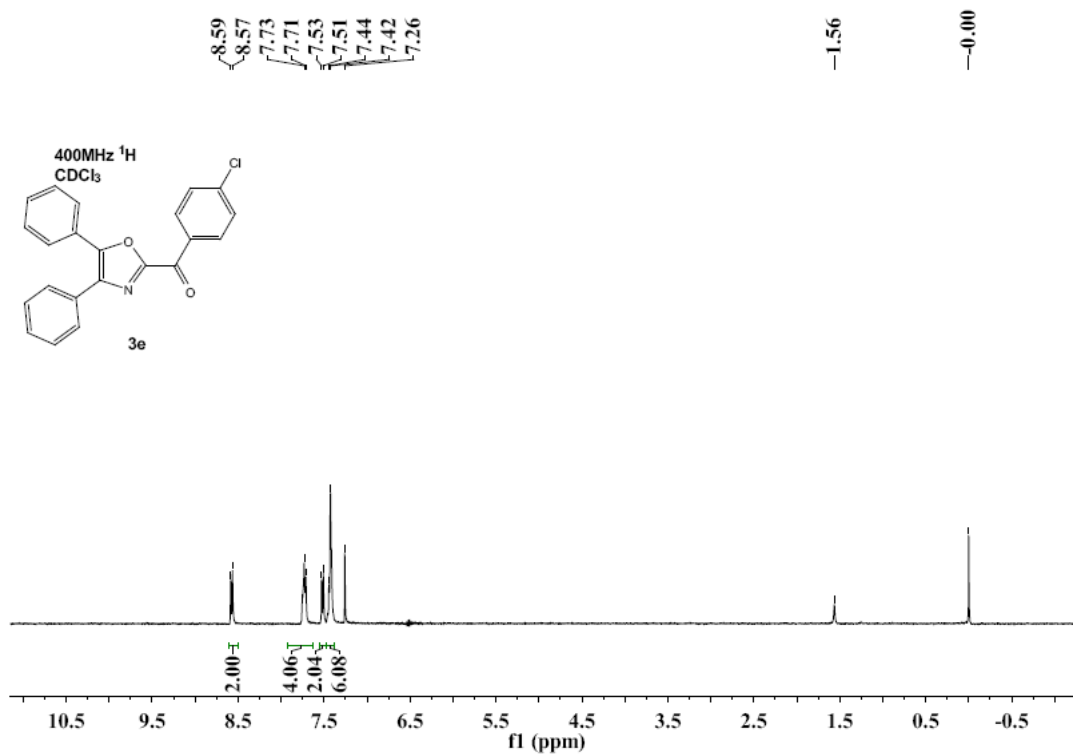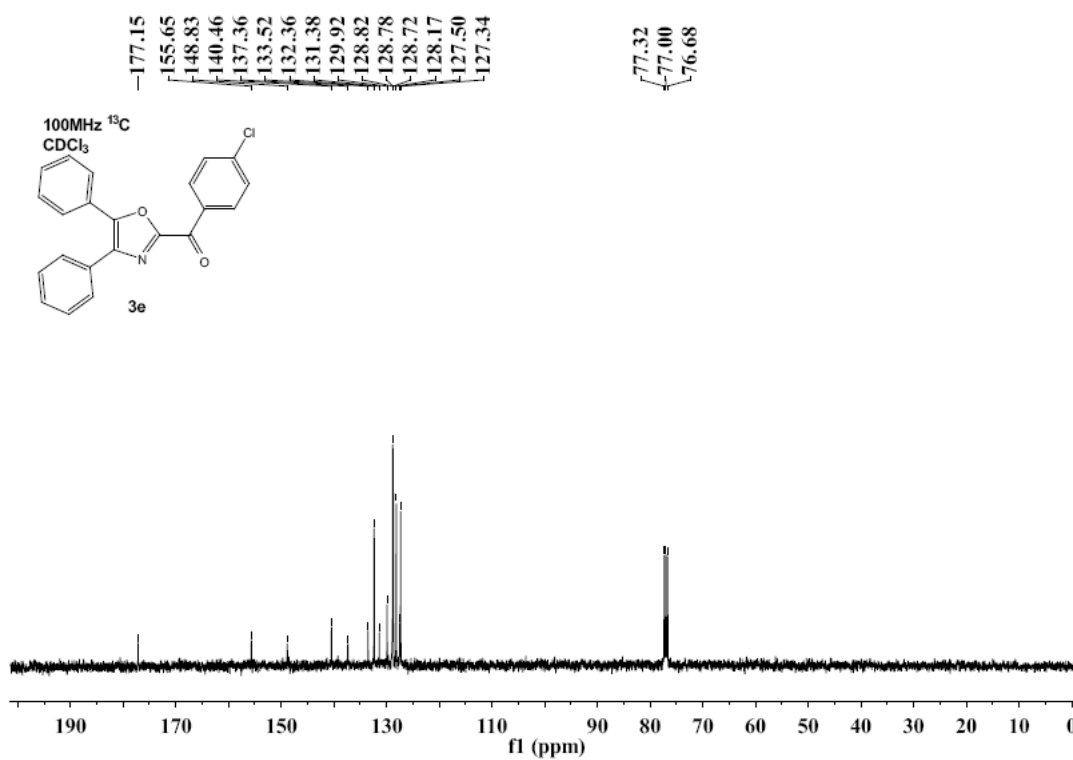

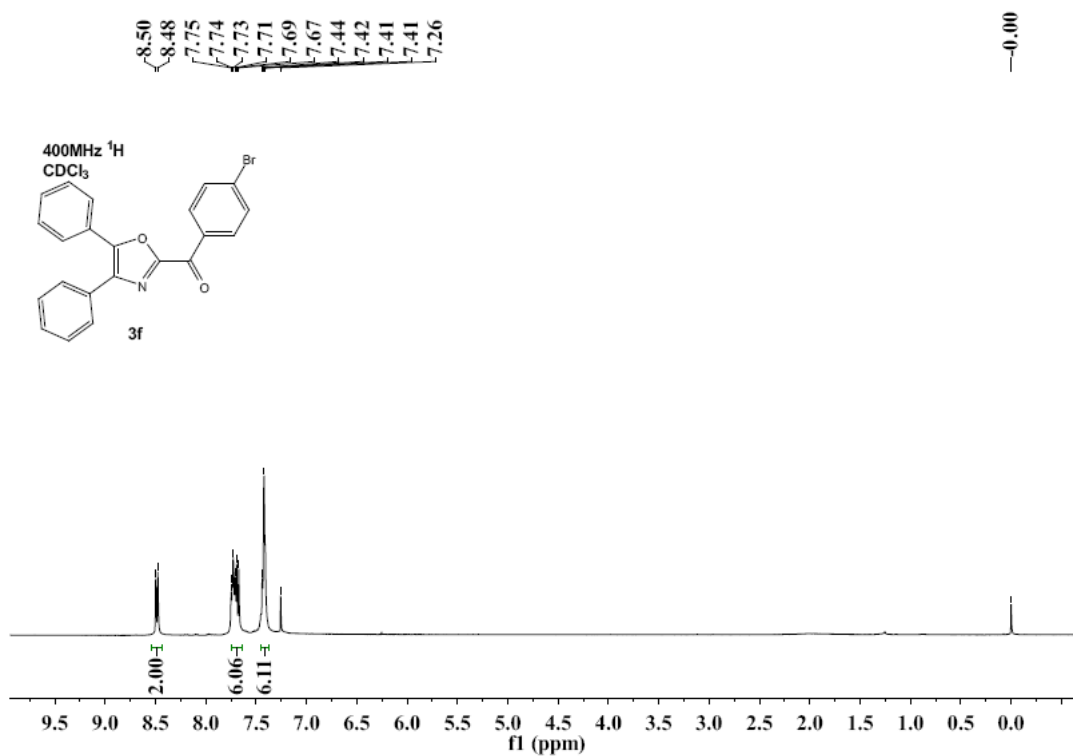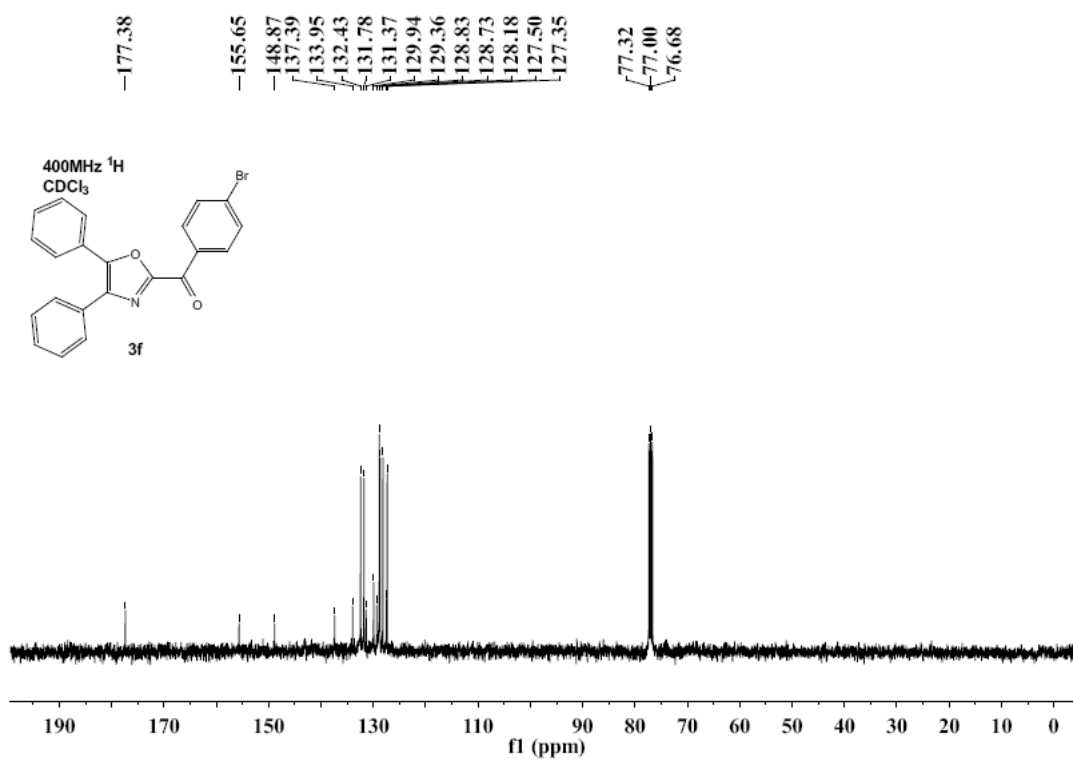

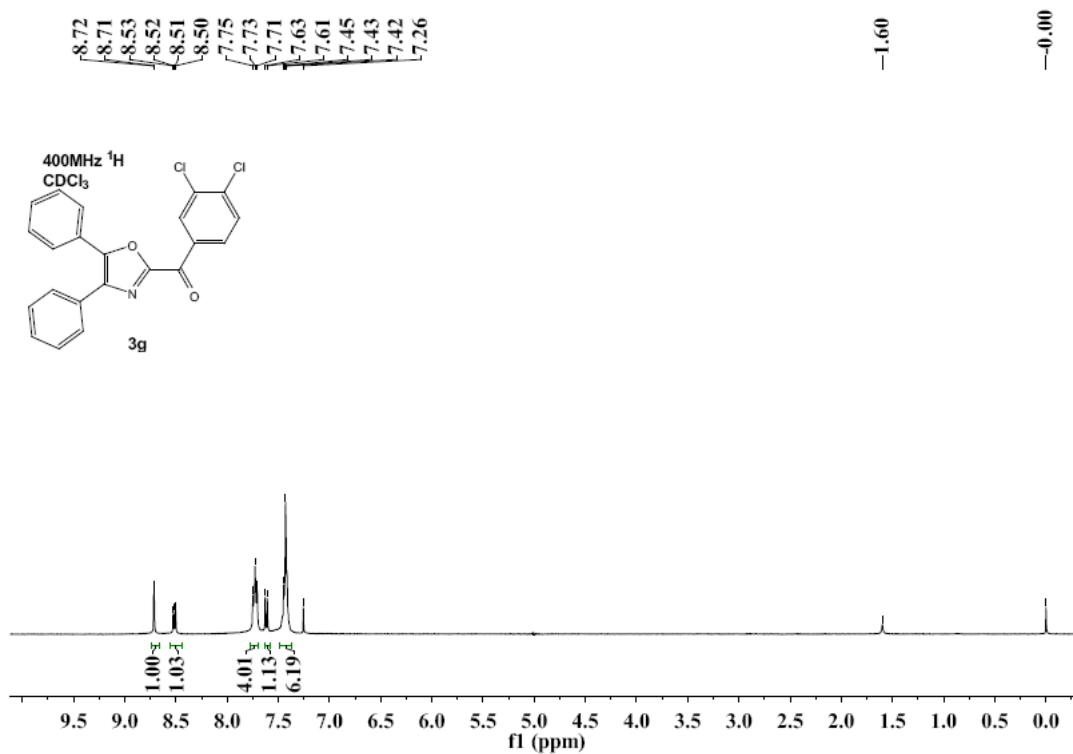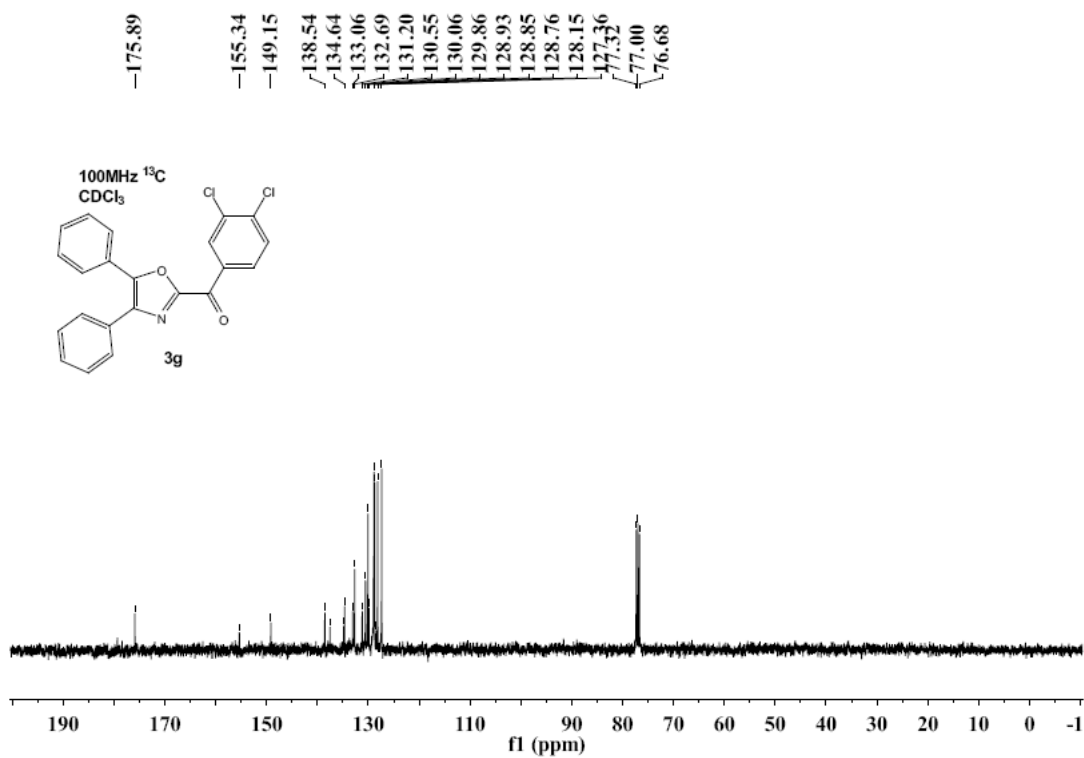

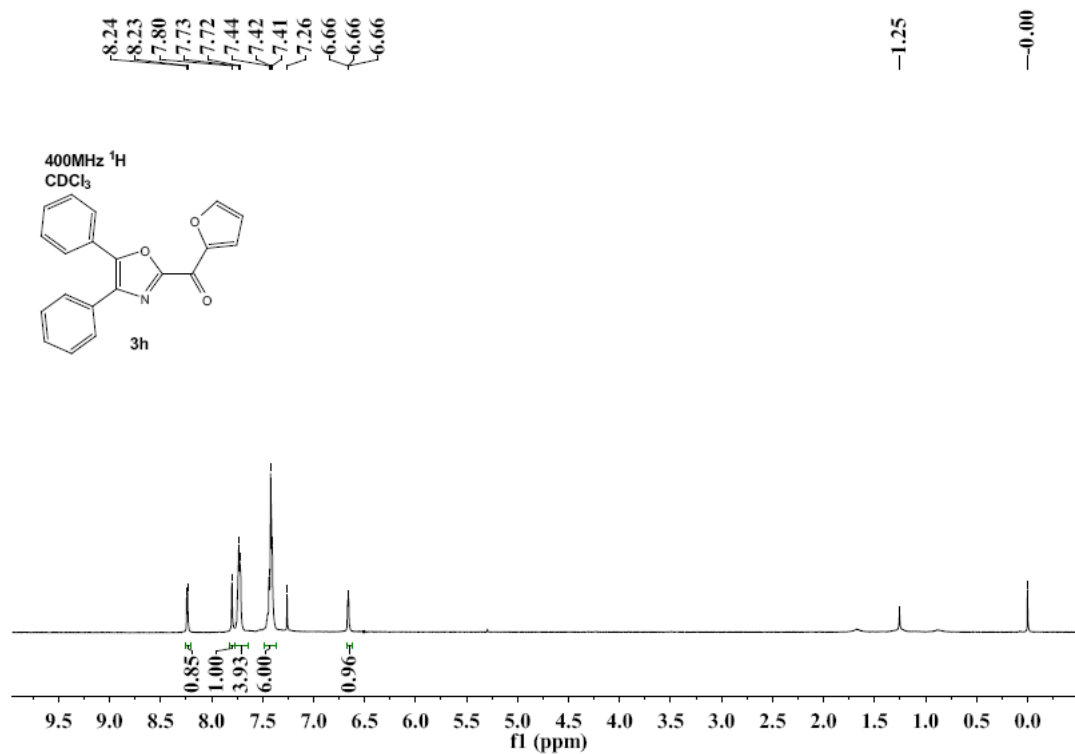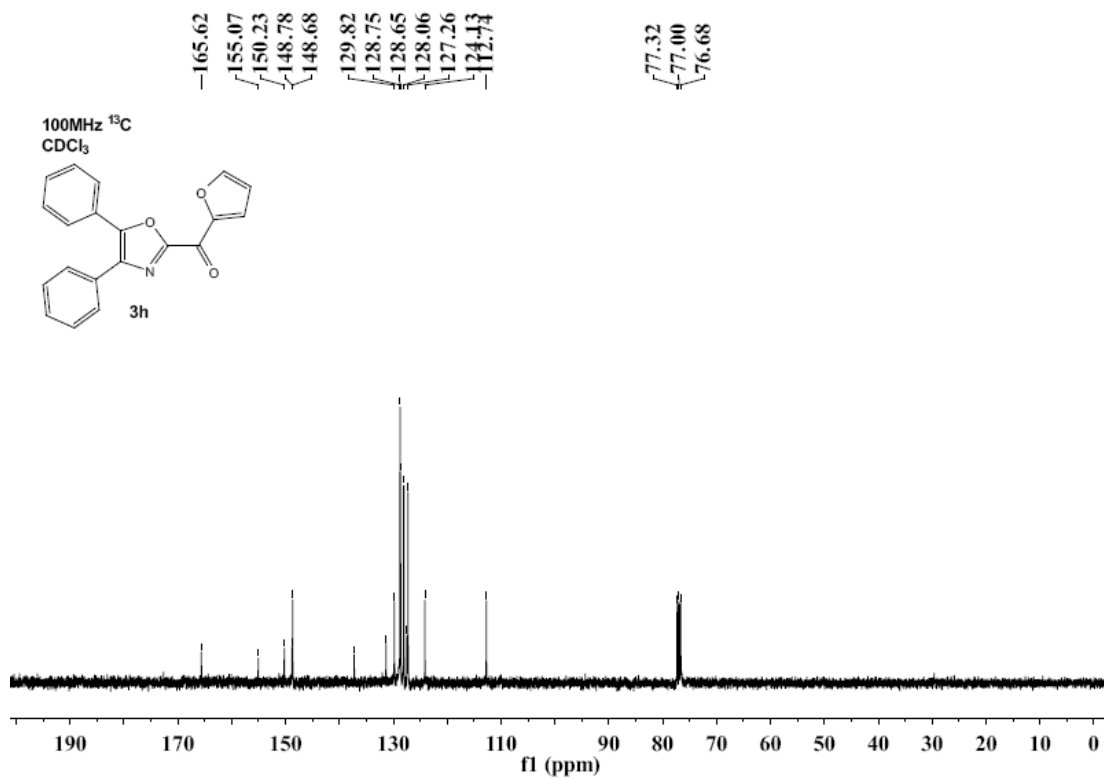

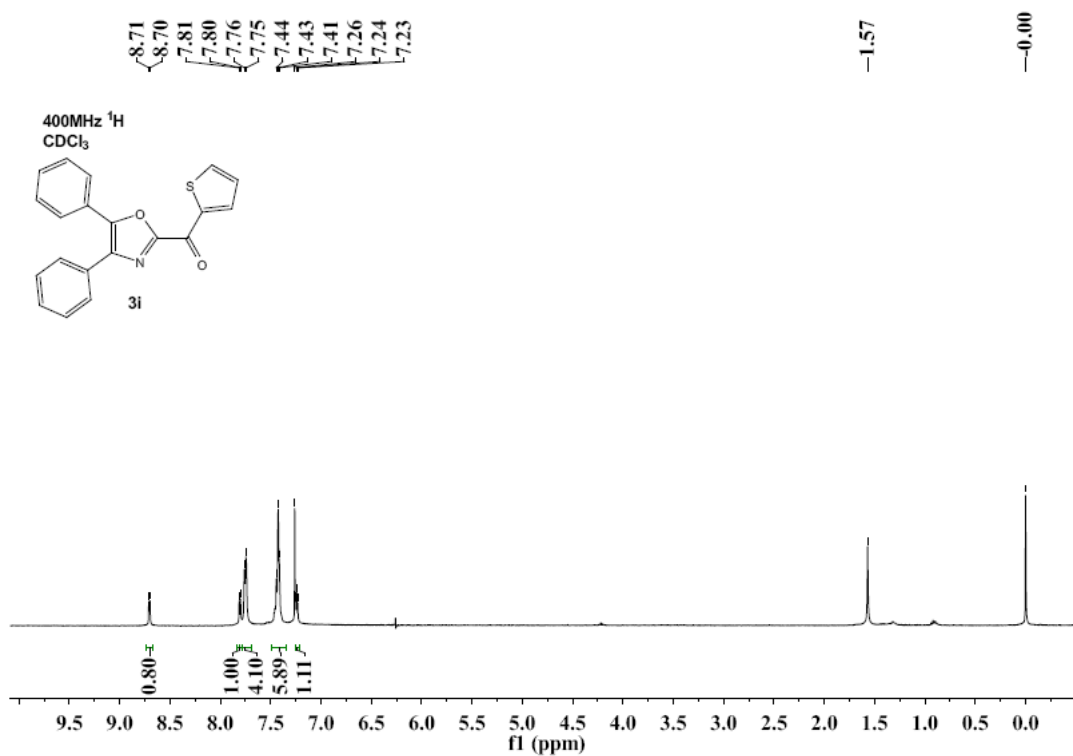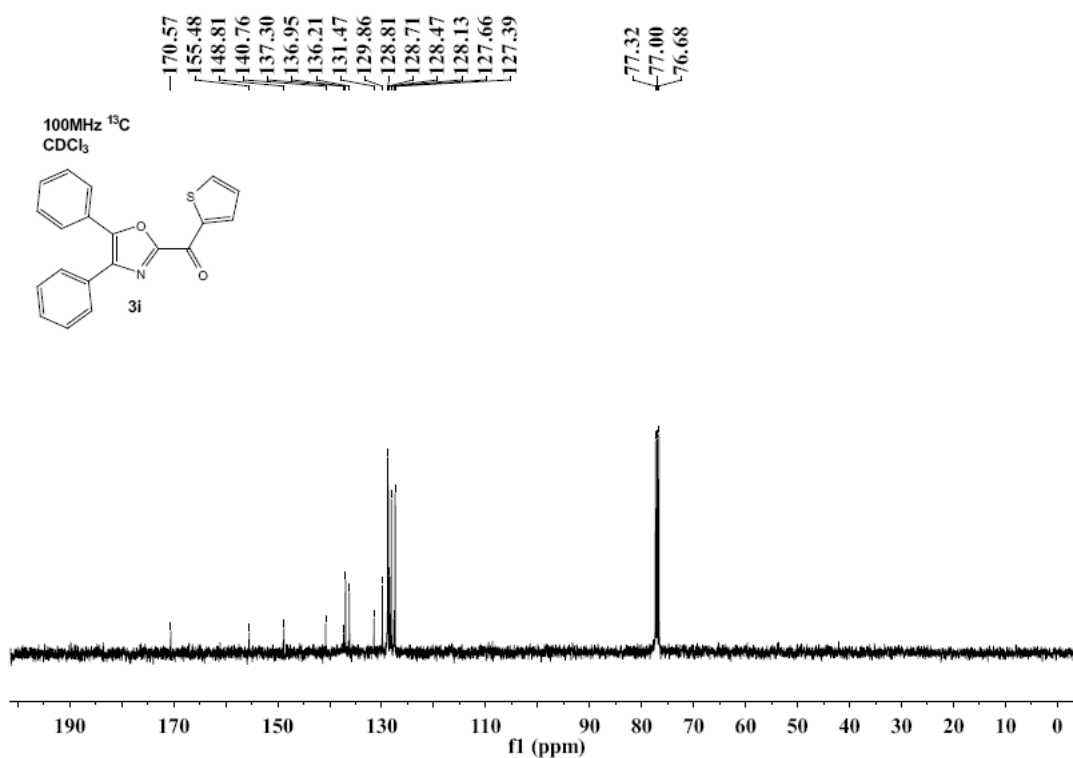

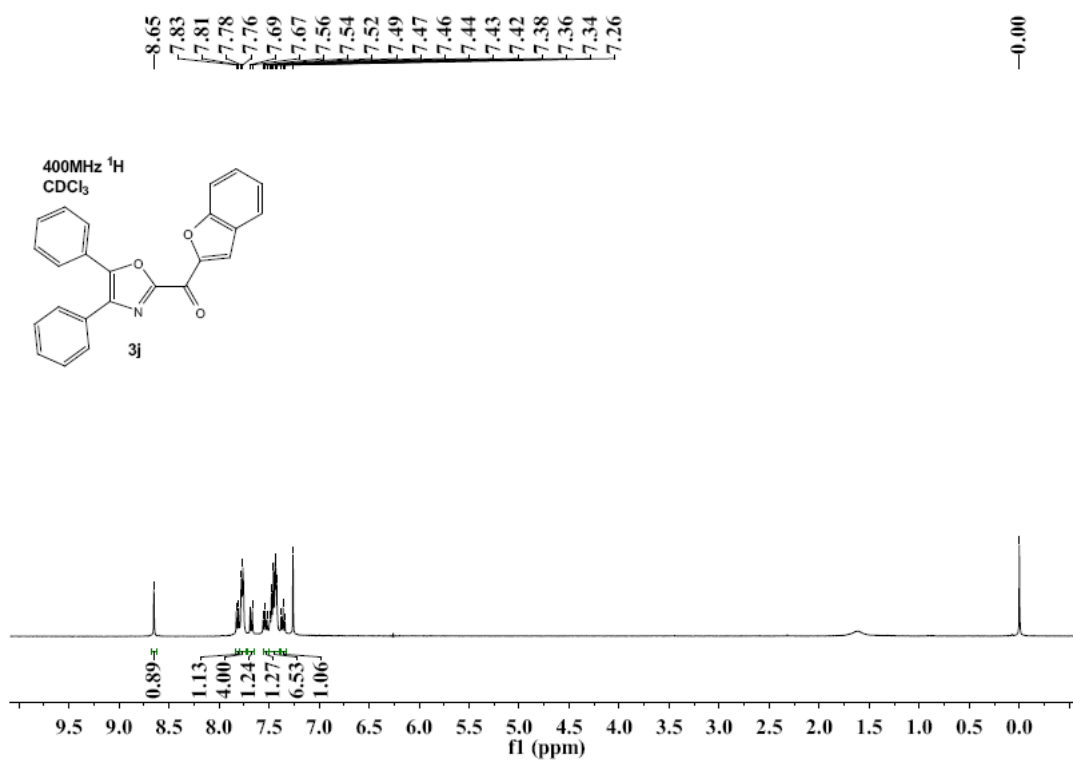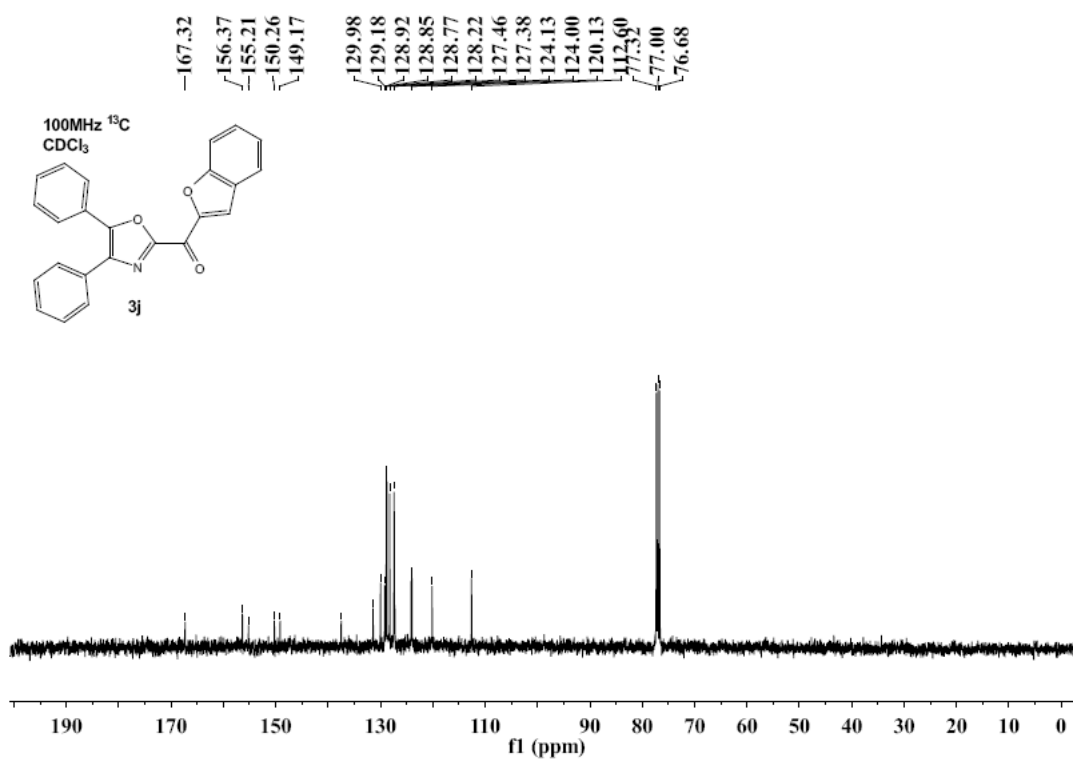





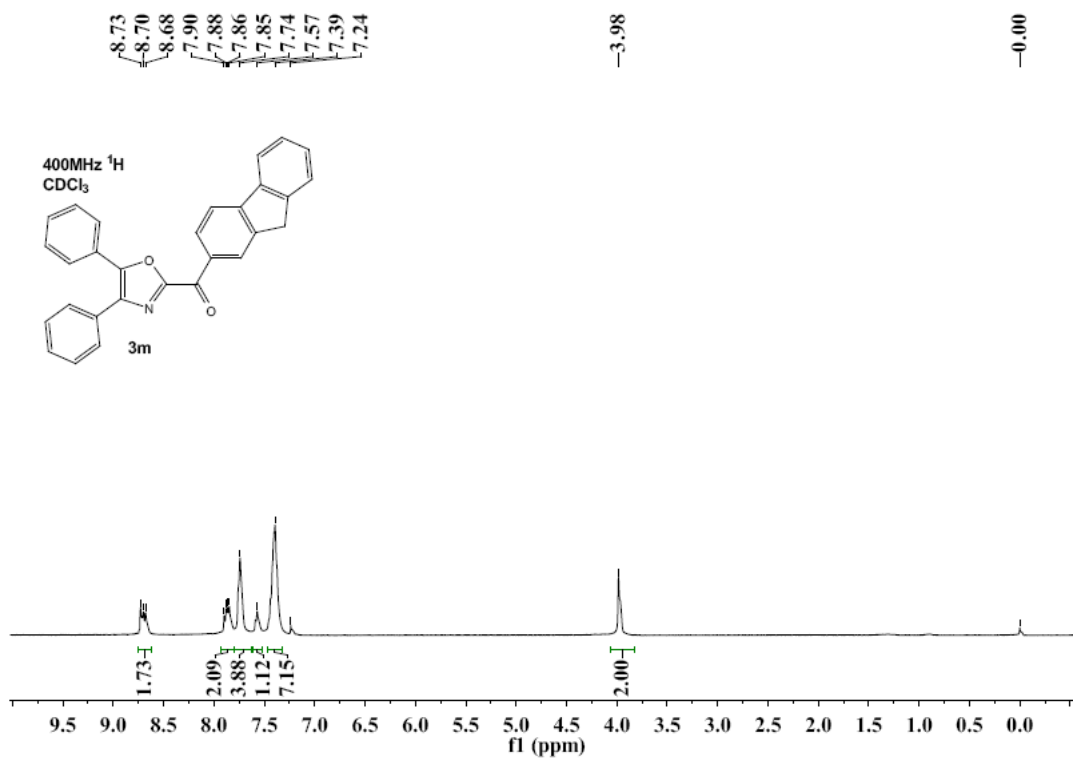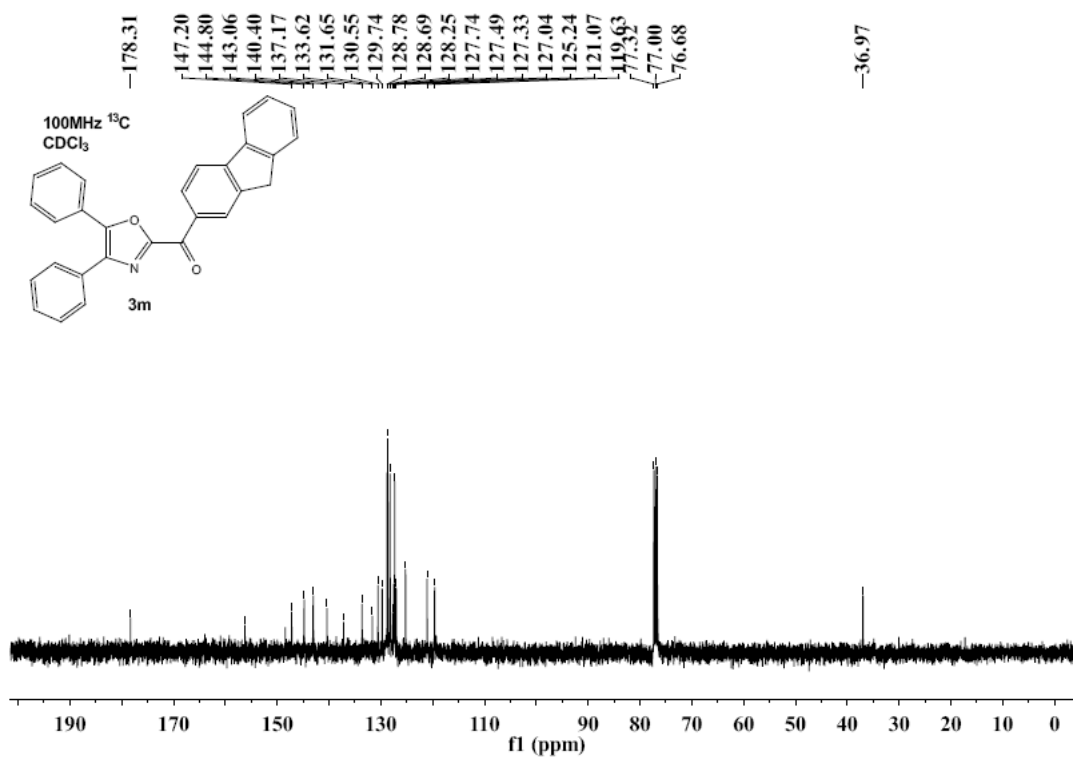

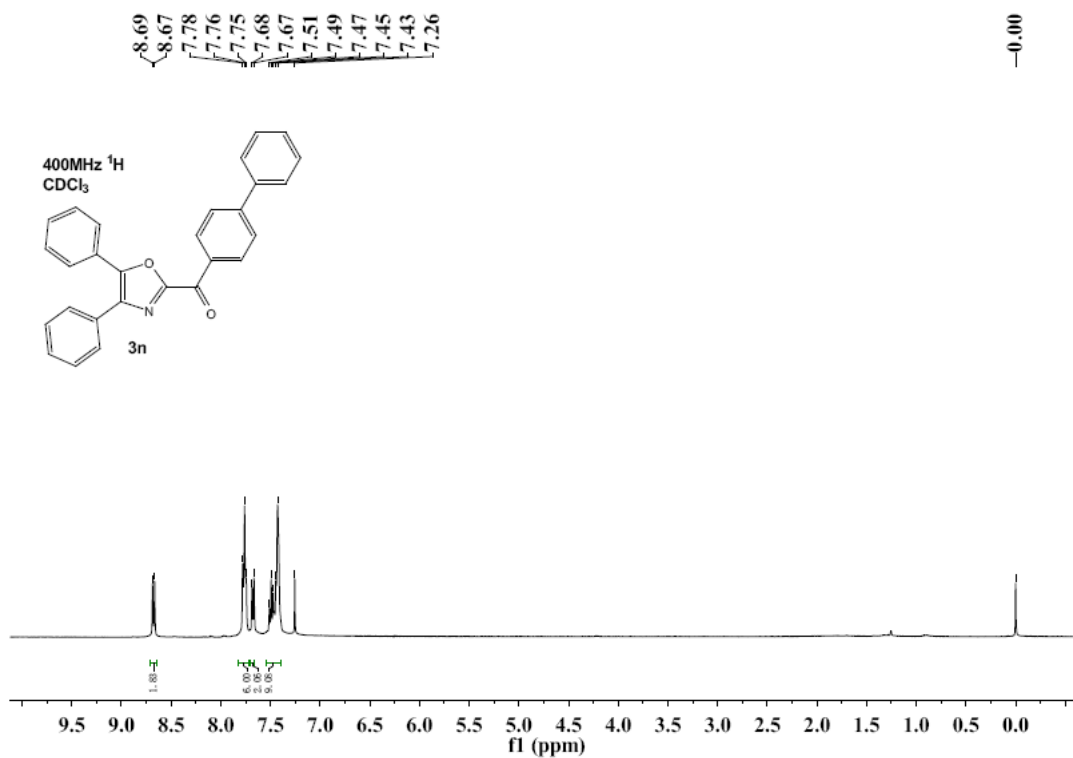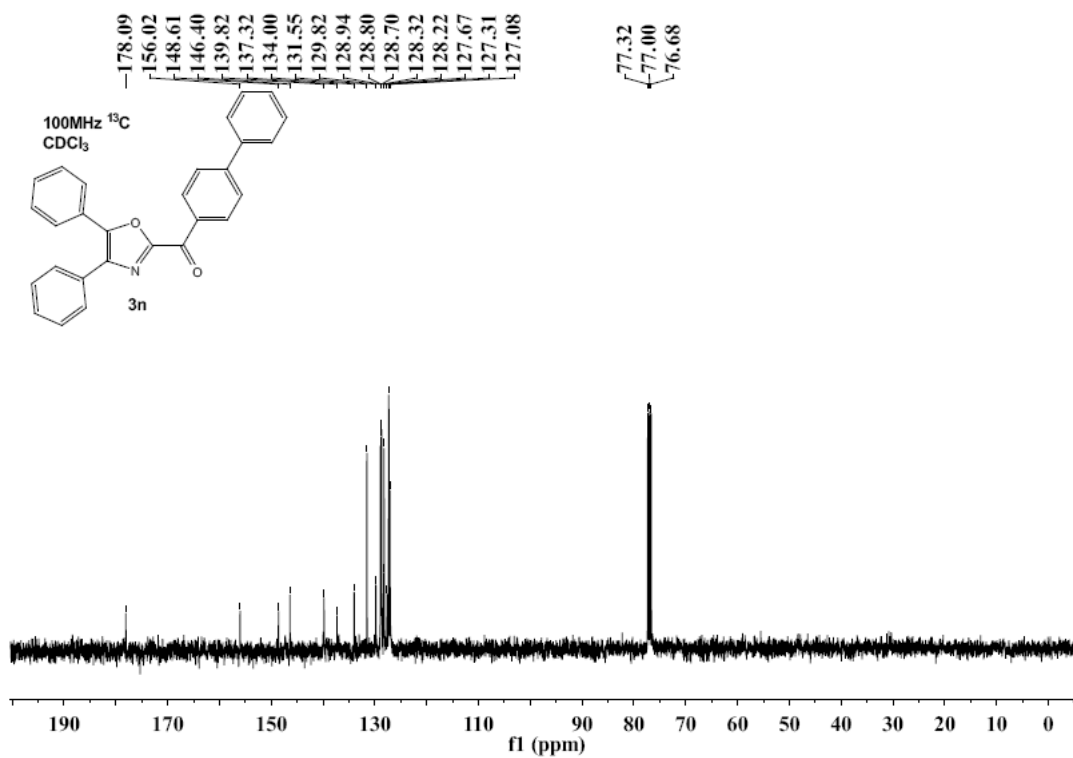

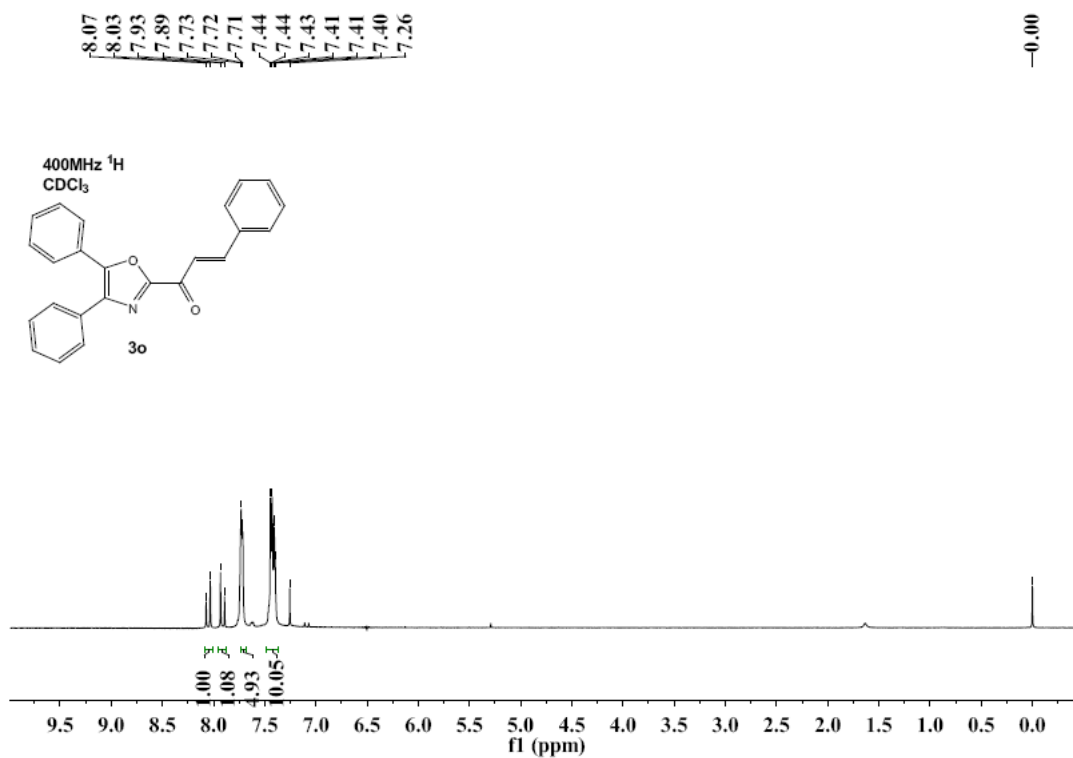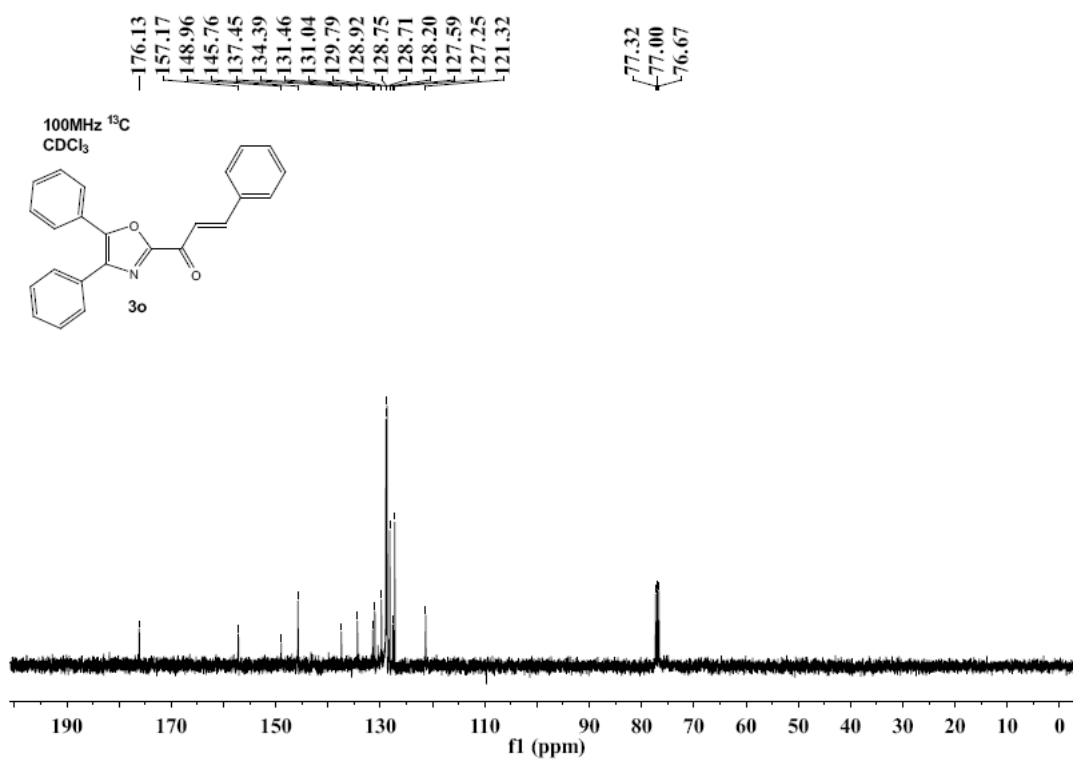

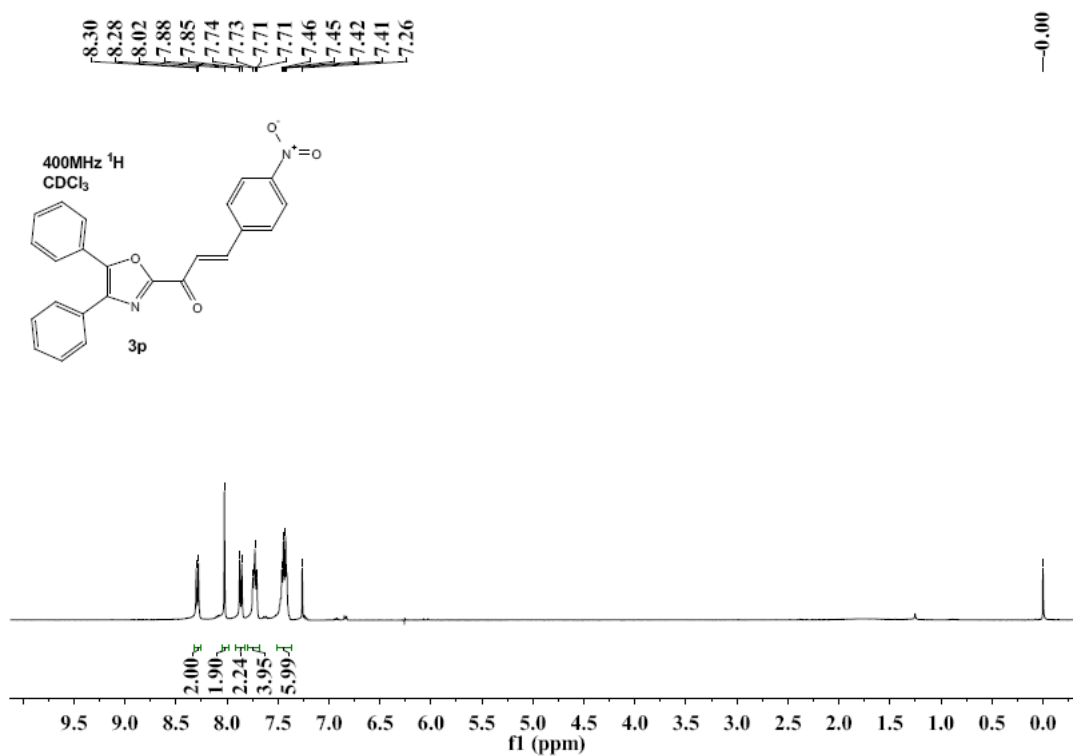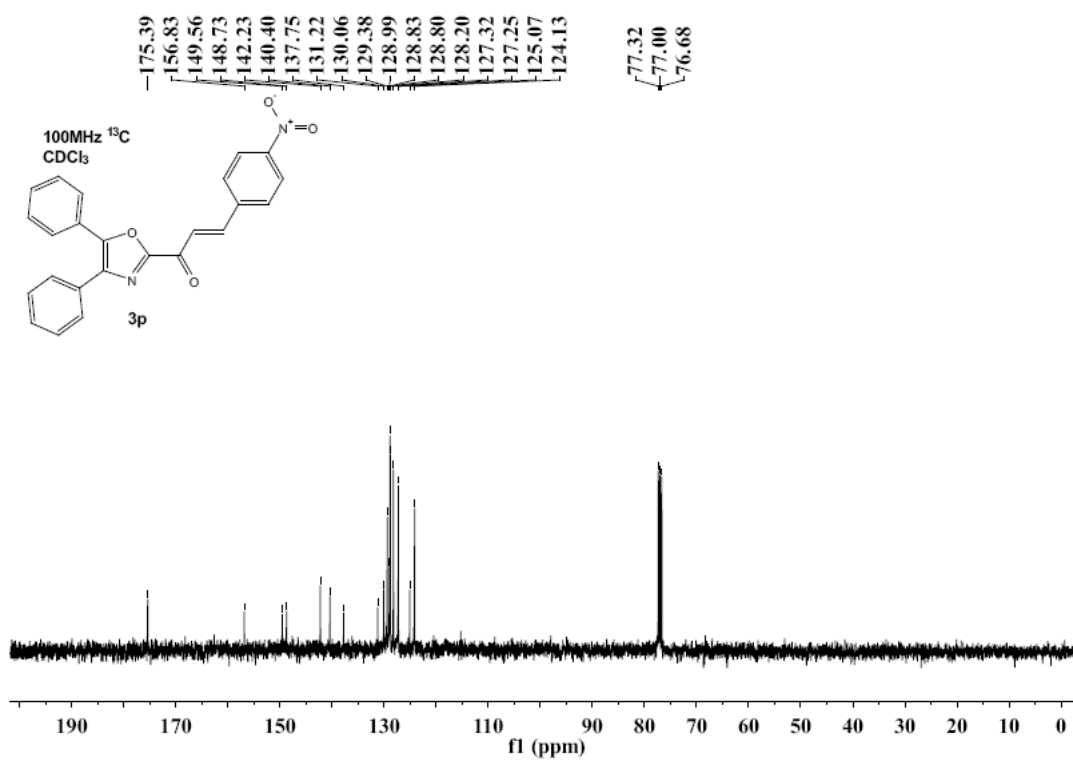

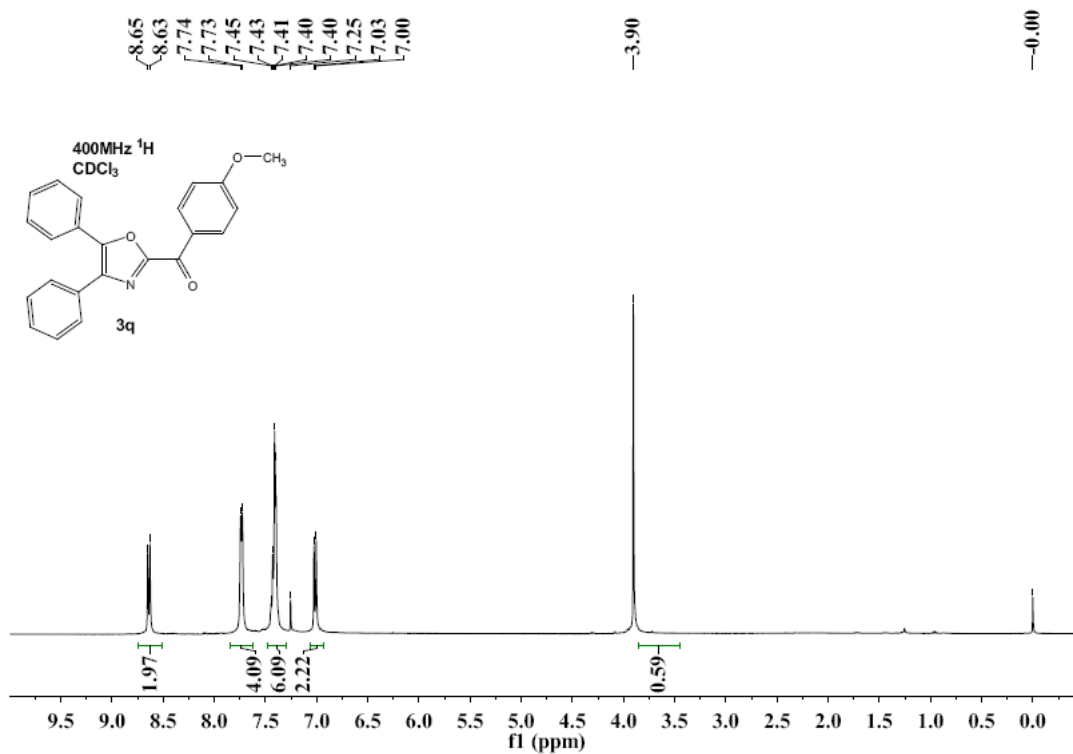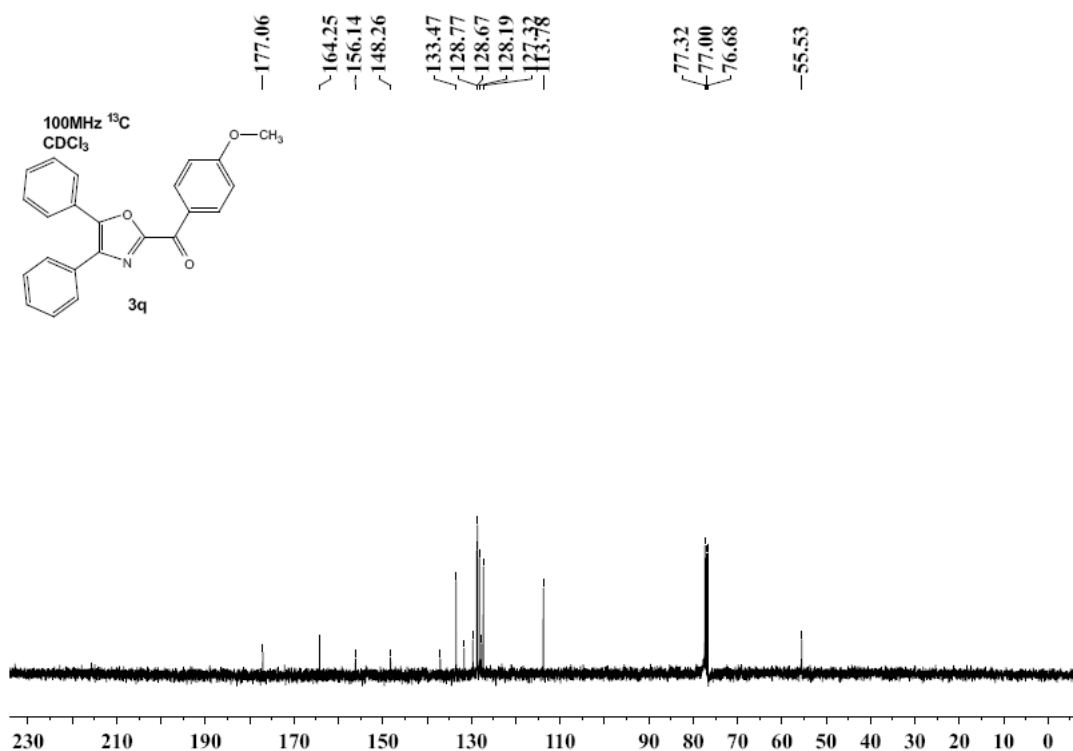

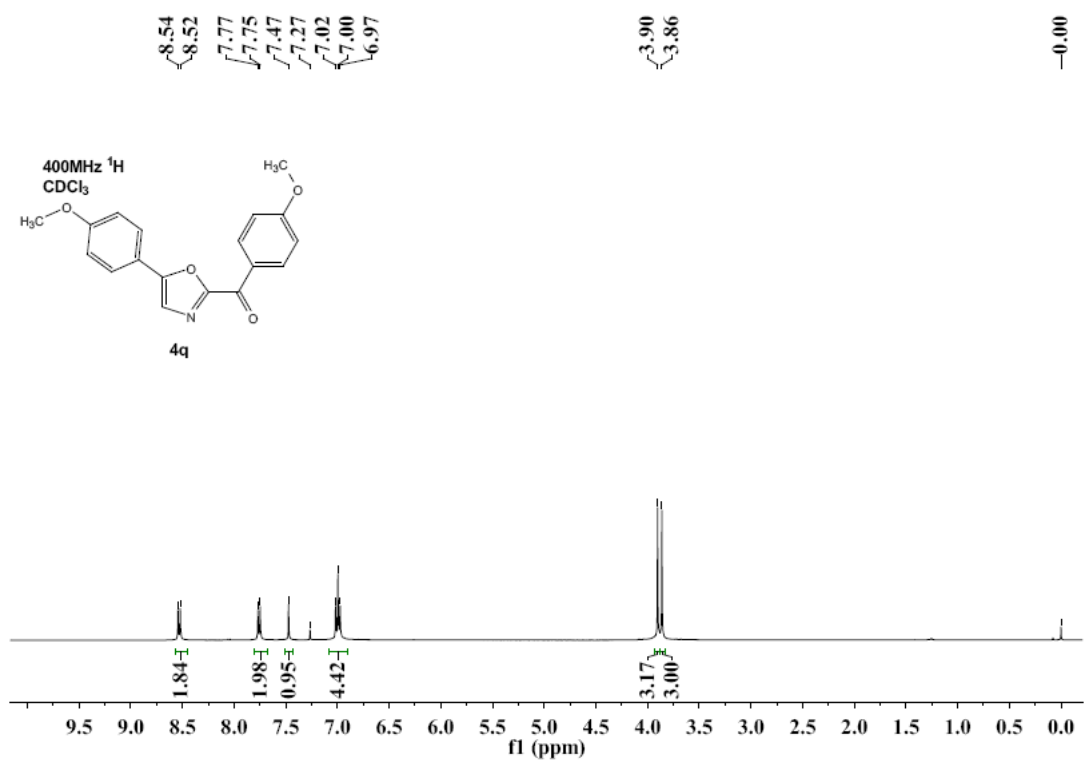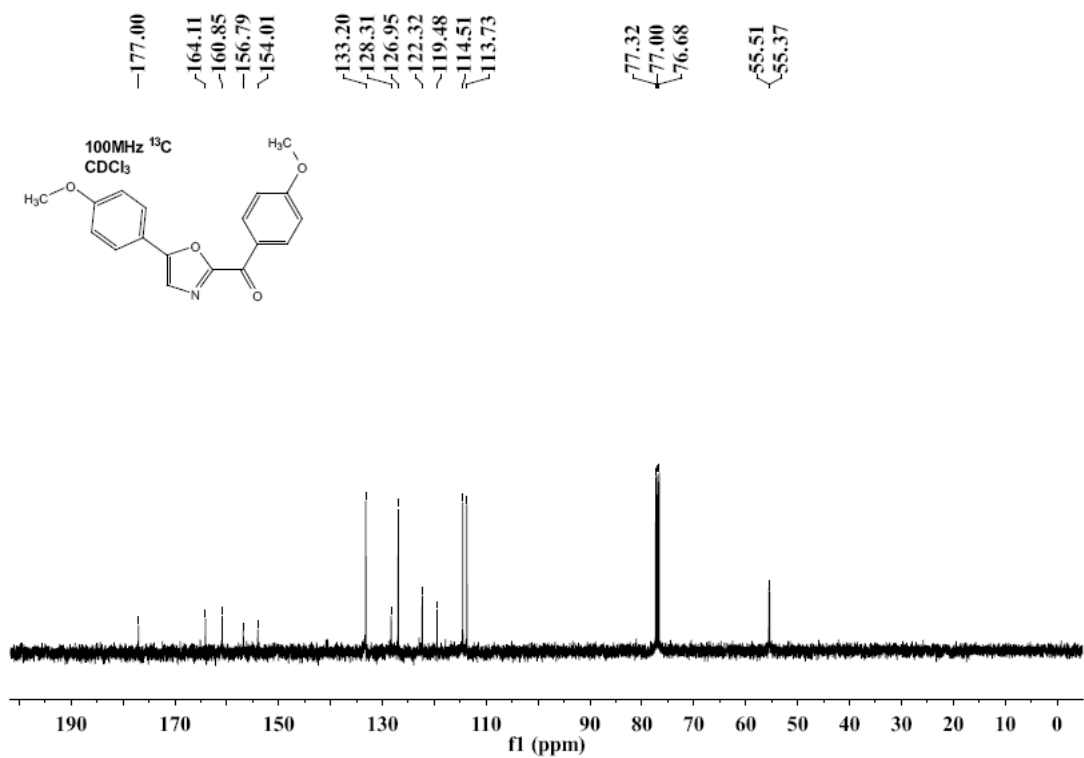

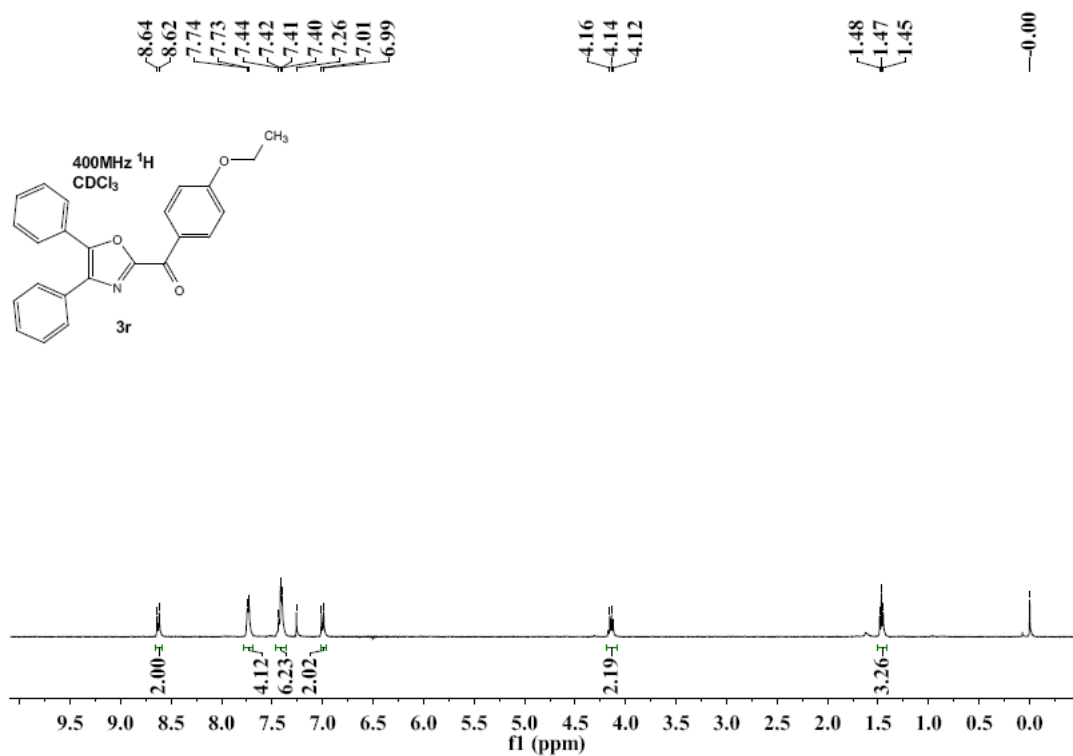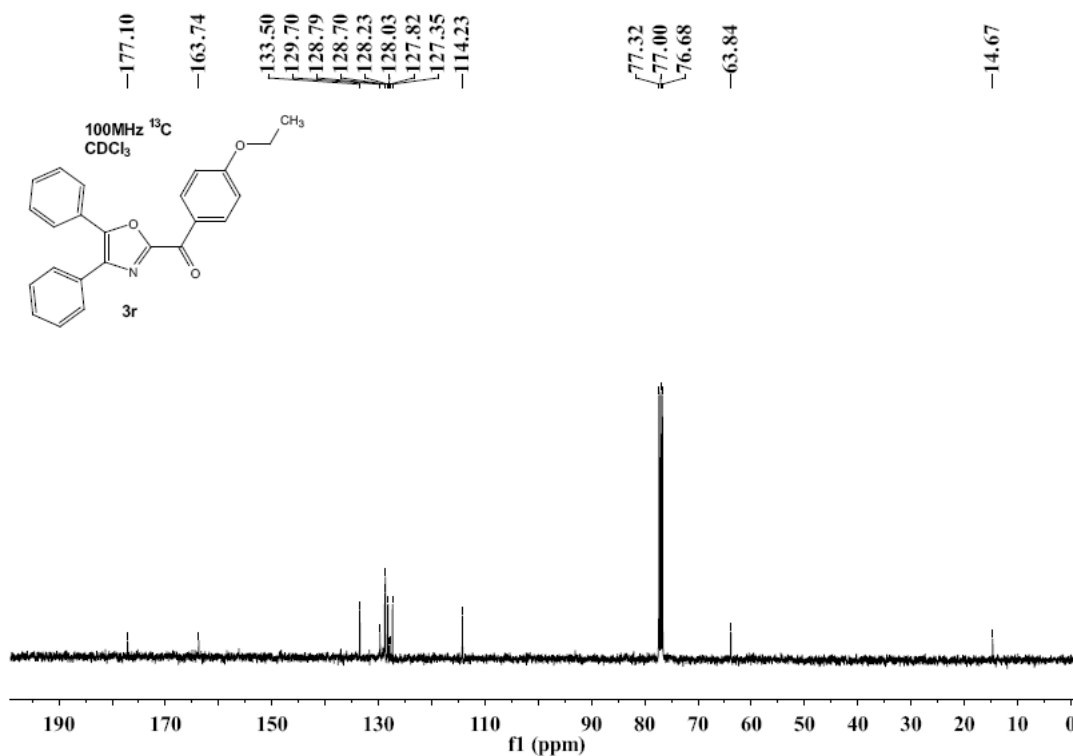



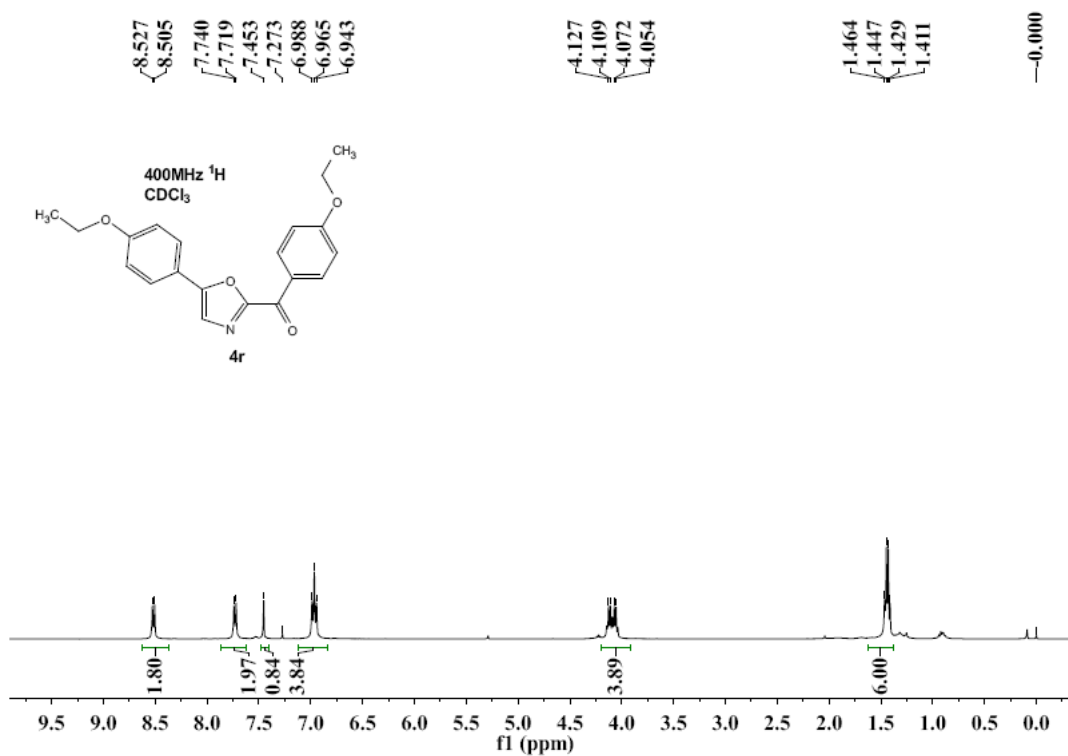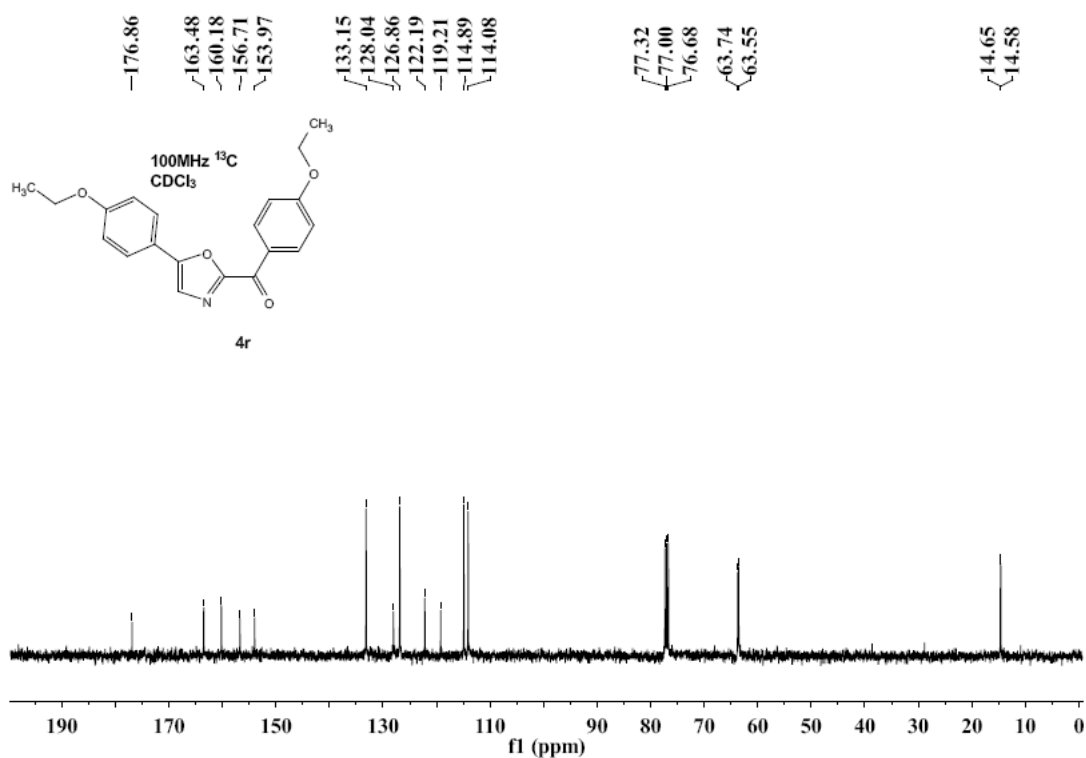

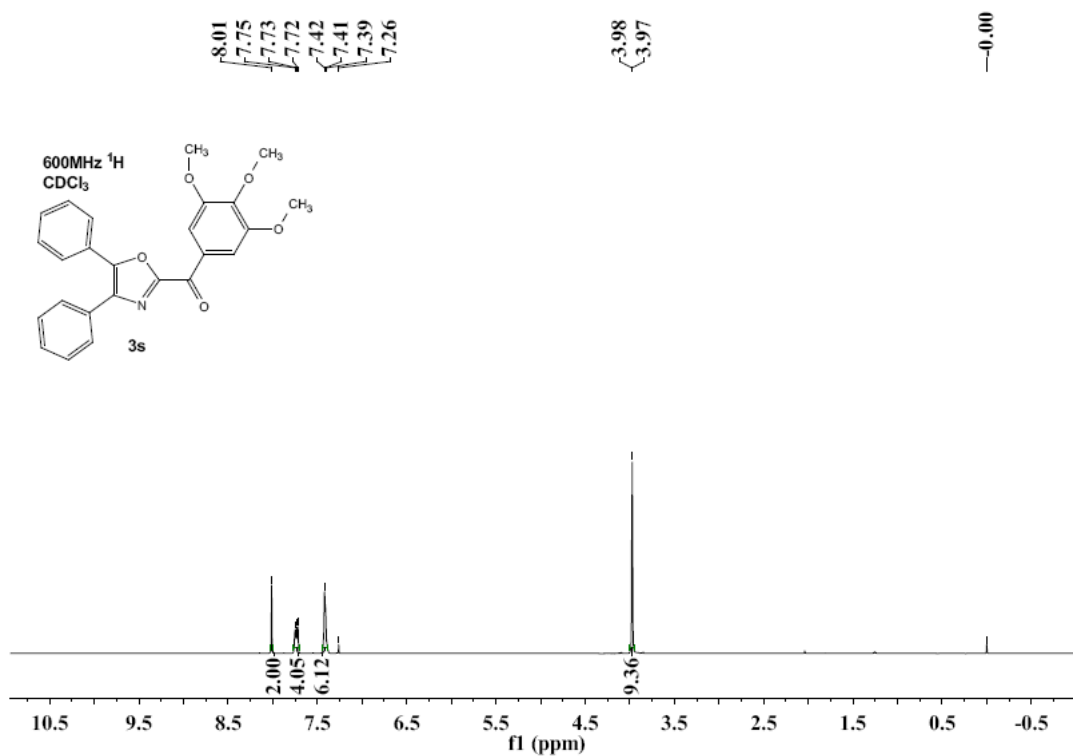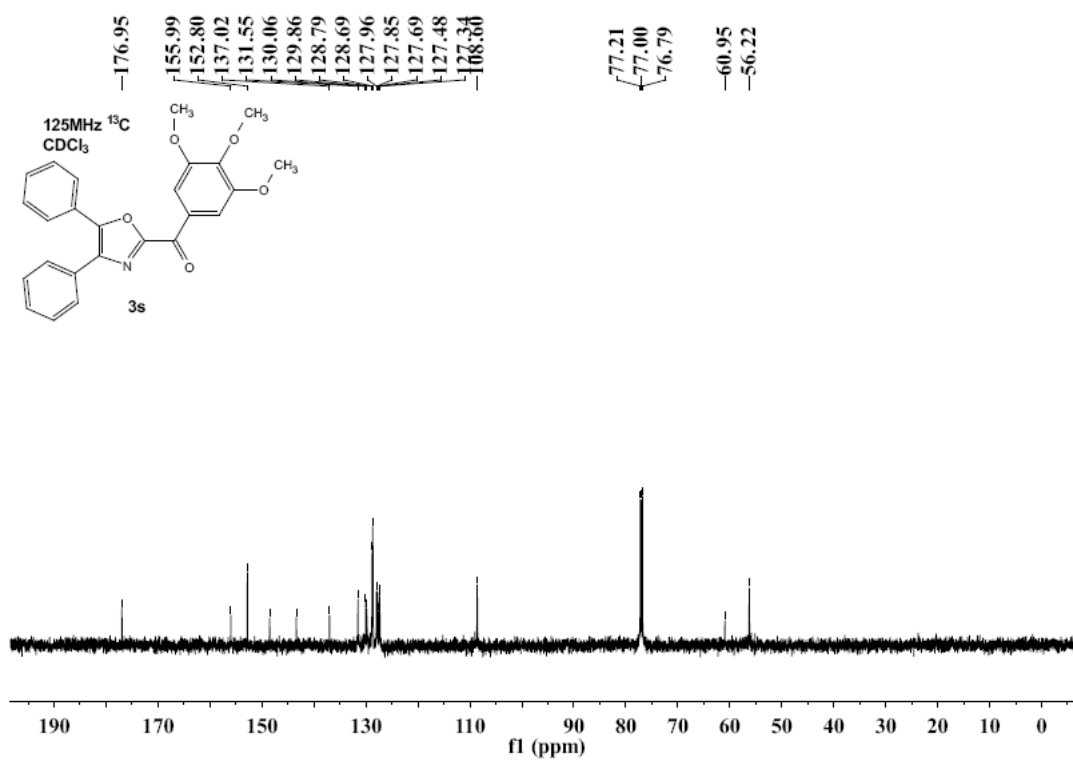

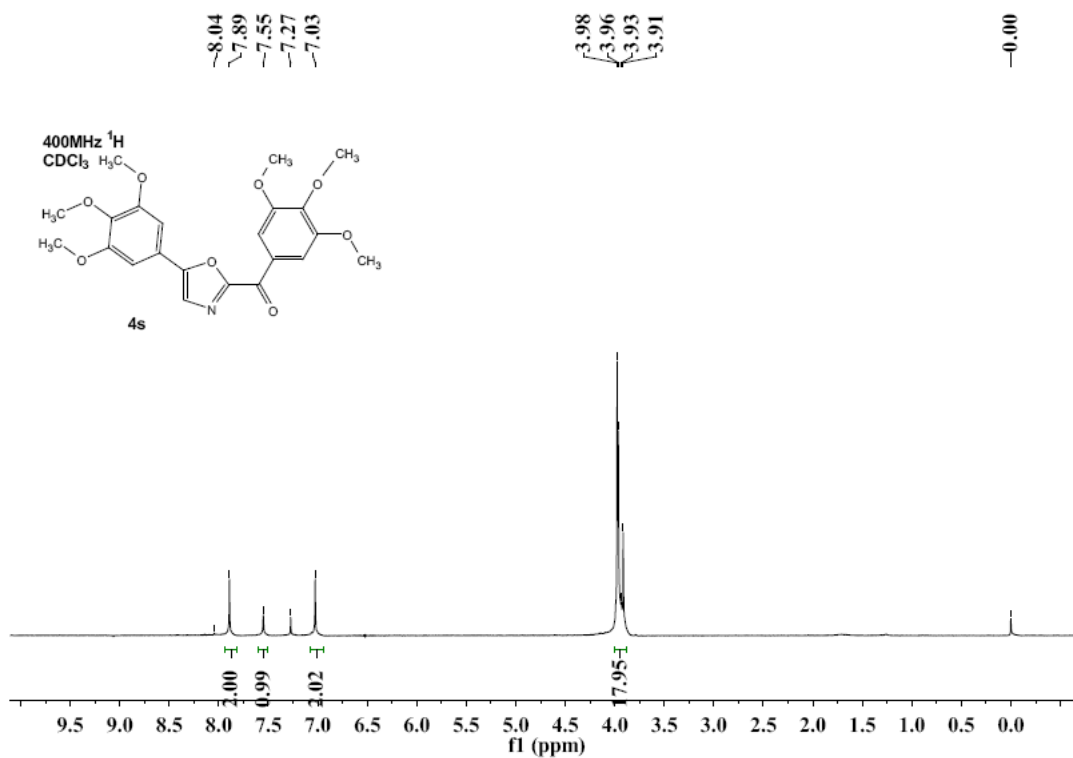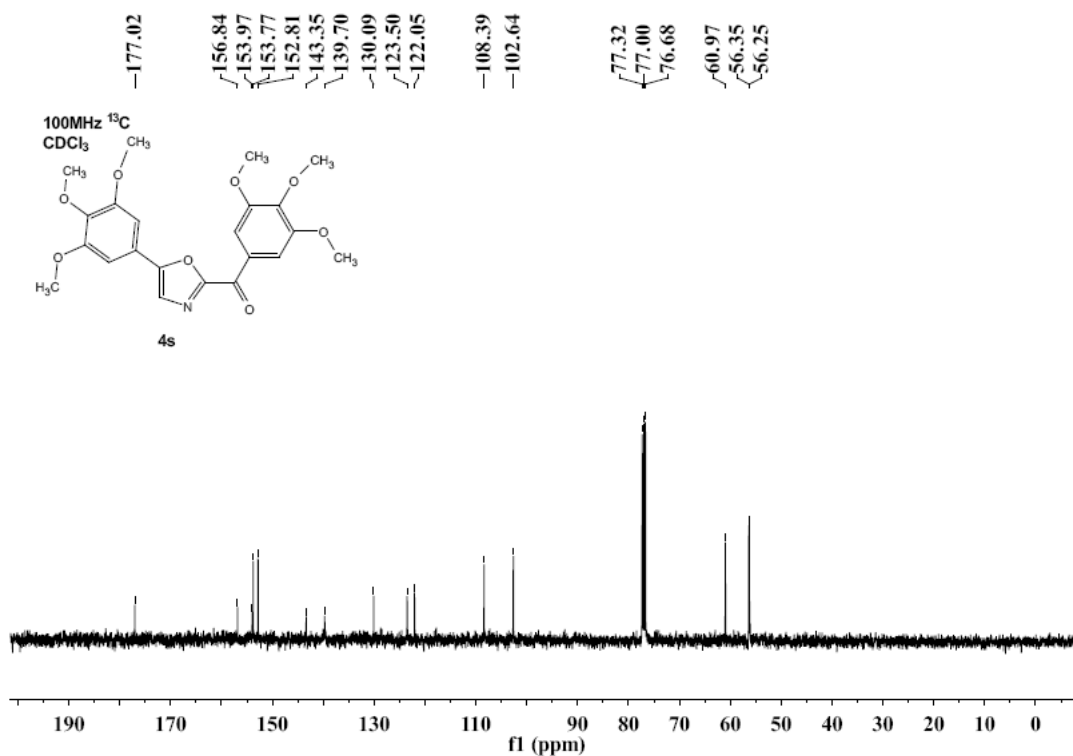

## 9. HRMS spectra

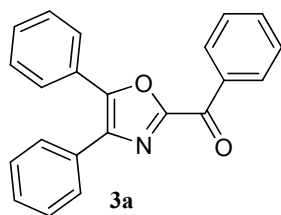

Chemical Formula: C<sub>22</sub>H<sub>15</sub>NO<sub>2</sub>  
 Molecular Weight: 325.36

### Acquisition Parameter

|                          |            |                         |           |                       |                          |
|--------------------------|------------|-------------------------|-----------|-----------------------|--------------------------|
| Polarity                 | Positive   | Source                  | ESI       | No. of Laser Shots    | 20                       |
| Averaged Scans           | 4          | No. of Cell Fills       | 1         | Laser Power           | 51.0 %                   |
| Broadband Low Mass       | 100.3 m/z  | End Plate               | 3500.0 V  | MALDI Plate           | 300.0 V                  |
| Broadband High Mass      | 2000.0 m/z | Capillary Entrance      | 4000.0 V  | Imaging Spot Diameter | 2000.0 μm                |
| Acquisition Mode         | Single MS  | Skimmer 1               | 20.0 V    | Calibration Date      | Mon Sep 19 06:39:58      |
| Pulse Program            | basic      | Drying Gas Temperature  | 180.0 °C  | Data Acquisition Size | 101072                   |
| Source Accumulation      | 0.0 sec    | Drying Gas Flow Rate    | 4.0 L/min | Apodization           | Sine-Bell Multiplication |
| Ion Accumulation Time    | 0.0 sec    | Nebulizer Gas Flow Rate | 1.0 L/min |                       |                          |
| Flight Time to Acq. Cell | 0.0 sec    |                         |           |                       |                          |

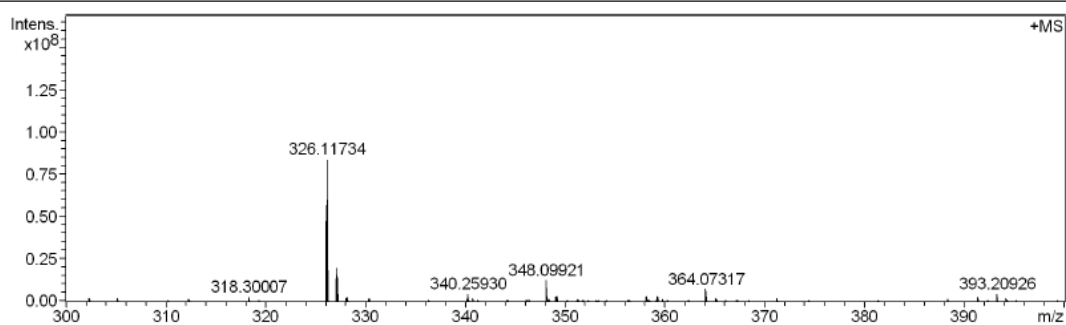

| Meas. m/z | # | Formula                                                       | Score  | m/z       | err [mDa] | err [ppm] | mSigma | rdb  | e <sub>1</sub> | Conf | N-Rule |
|-----------|---|---------------------------------------------------------------|--------|-----------|-----------|-----------|--------|------|----------------|------|--------|
| 326.11734 | 1 | C <sub>22</sub> H <sub>16</sub> N <sub>2</sub> O <sub>2</sub> | 100.00 | 326.11756 | 0.2       | 0.7       | 3.9    | 15.5 | even           |      | ok     |
|           | 2 | C <sub>17</sub> H <sub>16</sub> N <sub>3</sub> O <sub>4</sub> | 4.26   | 326.11353 | -3.8      | -11.7     | 23.3   | 11.5 | even           |      | ok     |
|           | 3 | C <sub>16</sub> H <sub>16</sub> N <sub>5</sub> O <sub>3</sub> | 0.01   | 326.12477 | 7.4       | 22.8      | 25.6   | 11.5 | even           |      | ok     |
|           | 4 | C <sub>15</sub> H <sub>20</sub> N <sub>2</sub> O <sub>7</sub> | 0.12   | 326.12343 | 6.1       | 18.7      | 39.9   | 6.5  | even           |      | ok     |
|           | 5 | C <sub>15</sub> H <sub>18</sub> N <sub>2</sub> O <sub>7</sub> | 0.00   | 324.10778 | -4.2      | -12.9     | 97.1   | 7.5  | even           |      | ok     |
|           | 6 | C <sub>15</sub> H <sub>14</sub> N <sub>7</sub> O <sub>2</sub> | 0.00   | 324.12035 | 7.9       | 24.1      | 109.2  | 12.5 | even           |      | ok     |
|           | 7 | C <sub>16</sub> H <sub>14</sub> N <sub>5</sub> O <sub>3</sub> | 0.00   | 324.10912 | -3.0      | -9.3      | 111.4  | 12.5 | even           |      | ok     |
|           | 8 | C <sub>18</sub> H <sub>17</sub> N <sub>2</sub> O <sub>4</sub> | 0.00   | 325.11828 | 4.1       | 12.6      | 117.7  | 11.5 | even           |      | ok     |
|           | 9 | C <sub>22</sub> H <sub>14</sub> N <sub>2</sub> O <sub>2</sub> | 0.00   | 324.10191 | -9.2      | -28.1     | 140.7  | 16.5 | even           |      | ok     |

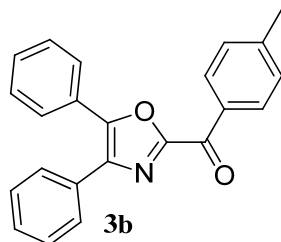

Chemical Formula:  $C_{23}H_{17}NO_2$   
 Molecular Weight: 339.39

**Acquisition Parameter**

|                          |            |                         |                    |                       |                          |
|--------------------------|------------|-------------------------|--------------------|-----------------------|--------------------------|
| Polarity                 | Positive   | Source                  | ESI                | No. of Laser Shots    | 20                       |
| Averaged Scans           | 4          | No. of Cell Fills       | 1                  | Laser Power           | 51.0 %                   |
| Broadband Low Mass       | 100.3 m/z  | End Plate               | 3500.0 V           | MALDI Plate           | 300.0 V                  |
| Broadband High Mass      | 2000.0 m/z | Capillary Entrance      | 4000.0 V           | Imaging Spot Diameter | 2000.0 $\mu$ m           |
| Acquisition Mode         | Single MS  | Skimmer 1               | 20.0 V             | Calibration Date      | Mon Sep 19 06:39:58      |
| Pulse Program            | basic      | Drying Gas Temperature  | 180.0 $^{\circ}$ C | Data Acquisition Size | 201072                   |
| Source Accumulation      | 0.0 sec    | Drying Gas Flow Rate    | 4.0 L/min          | Apodization           | Sine-Bell Multiplication |
| Ion Accumulation Time    | 0.0 sec    | Nebulizer Gas Flow Rate | 1.0 L/min          |                       |                          |
| Flight Time to Acq. Cell | 0.0 sec    |                         |                    |                       |                          |

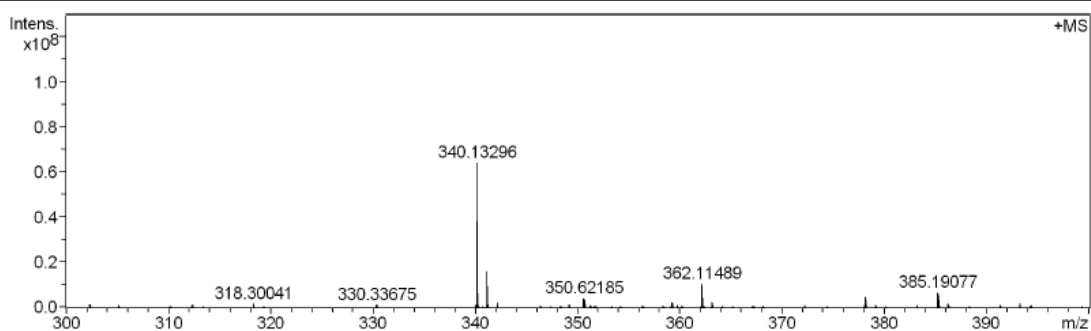

| Meas. m/z | # | Formula                                         | Score  | m/z       | err [mDa] | err [ppm] | mSigma | rdb  | ej*Conf | N-Rule |
|-----------|---|-------------------------------------------------|--------|-----------|-----------|-----------|--------|------|---------|--------|
| 340.13296 | 1 | C <sub>23</sub> H <sub>18</sub> NO <sub>2</sub> | 100.00 | 340.13321 | 0.2       | 0.7       | 1.0    | 15.5 | even    | ok     |
|           | 2 | C <sub>23</sub> H <sub>16</sub> NO <sub>2</sub> | 0.00   | 338.11756 | -9.1      | -26.8     | 147.1  | 16.5 | even    | ok     |

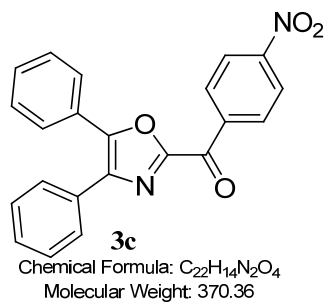

**Acquisition Parameter**

|                          |            |                         |           |                       |                          |
|--------------------------|------------|-------------------------|-----------|-----------------------|--------------------------|
| Polarity                 | Positive   | Source                  | ESI       | No. of Laser Shots    | 20                       |
| Averaged Scans           | 4          | No. of Cell Fills       | 1         | Laser Power           | 51.0 %                   |
| Broadband Low Mass       | 100.3 m/z  | End Plate               | 3500.0 V  | MALDI Plate           | 300.0 V                  |
| Broadband High Mass      | 2000.0 m/z | Capillary Entrance      | 4000.0 V  | Imaging Spot Diameter | 2000.0 μm                |
| Acquisition Mode         | Single MS  | Skimmer 1               | 20.0 V    |                       |                          |
| Pulse Program            | basic      | Drying Gas Temperature  | 180.0 °C  | Calibration Date      | Mon Sep 19 06:39:58      |
| Source Accumulation      | 0.0 sec    | Drying Gas Flow Rate    | 4.0 L/min | Data Acquisition Size | 101072                   |
| Ion Accumulation Time    | 0.0 sec    | Nebulizer Gas Flow Rate | 1.0 L/min | Apodization           | Sine-Bell Multiplication |
| Flight Time to Acq. Cell | 0.0 sec    |                         |           |                       |                          |

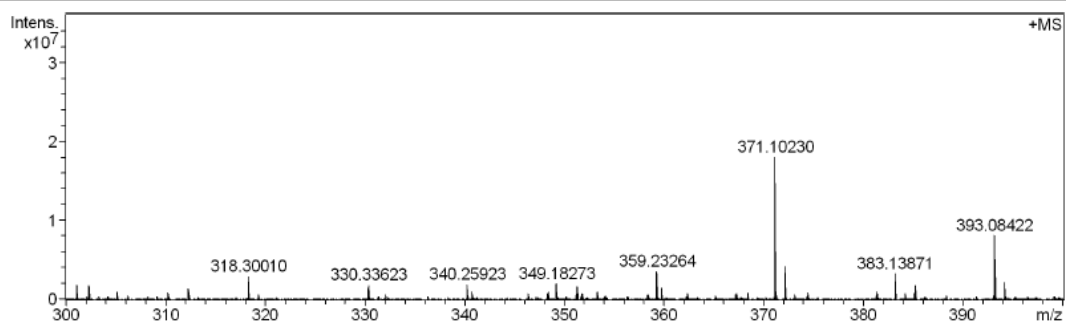

| Meas. m/z | # | Formula                                                       | Score  | m/z       | err [mDa] | err [ppm] | mSigma | rdb  | e <sub>1</sub> Conf | N-Rule |
|-----------|---|---------------------------------------------------------------|--------|-----------|-----------|-----------|--------|------|---------------------|--------|
| 371.10230 | 1 | C <sub>22</sub> H <sub>15</sub> N <sub>2</sub> O <sub>4</sub> | 100.00 | 371.10263 | 0.3       | 0.9       | 4.7    | 16.5 | even                | ok     |
|           | 2 | C <sub>17</sub> H <sub>15</sub> N <sub>4</sub> O <sub>6</sub> | 5.28   | 371.09861 | -3.7      | -9.9      | 22.5   | 12.5 | even                | ok     |
|           | 3 | C <sub>16</sub> H <sub>15</sub> N <sub>6</sub> O <sub>5</sub> | 0.01   | 371.10984 | 7.5       | 20.3      | 24.7   | 12.5 | even                | ok     |
|           | 4 | C <sub>15</sub> H <sub>19</sub> N <sub>2</sub> O <sub>9</sub> | 0.10   | 371.10851 | 6.2       | 16.7      | 39.2   | 7.5  | even                | ok     |
|           | 5 | C <sub>18</sub> H <sub>16</sub> N <sub>3</sub> O <sub>6</sub> | 0.00   | 370.10336 | 4.1       | 11.1      | 746.7  | 12.5 | even                | ok     |
|           | 6 | C <sub>15</sub> H <sub>17</sub> N <sub>2</sub> O <sub>9</sub> | 0.00   | 369.09286 | -4.3      | -11.6     | 809.5  | 8.5  | even                | ok     |
|           | 7 | C <sub>16</sub> H <sub>13</sub> N <sub>6</sub> O <sub>5</sub> | 0.00   | 369.09419 | -3.2      | -8.5      | 812.9  | 13.5 | even                | ok     |
|           | 8 | C <sub>15</sub> H <sub>13</sub> N <sub>8</sub> O <sub>4</sub> | 0.00   | 369.10543 | 7.7       | 20.9      | 813.8  | 13.5 | even                | ok     |
|           | 9 | C <sub>22</sub> H <sub>13</sub> N <sub>2</sub> O <sub>4</sub> | 0.00   | 369.08698 | -9.4      | -25.4     | 814.0  | 17.5 | even                | ok     |

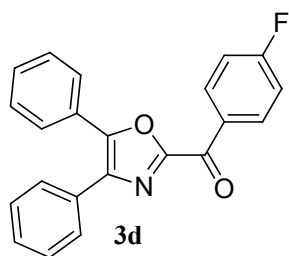

Chemical Formula: C<sub>22</sub>H<sub>14</sub>FNO<sub>2</sub>  
 Molecular Weight: 343.35

**Acquisition Parameter**

|                          |            |                         |           |                       |                          |
|--------------------------|------------|-------------------------|-----------|-----------------------|--------------------------|
| Polarity                 | Positive   | Source                  | ESI       | No. of Laser Shots    | 20                       |
| Averaged Scans           | 4          | No. of Cell Fills       | 1         | Laser Power           | 51.0 %                   |
| Broadband Low Mass       | 100.3 m/z  | End Plate               | 3500.0 V  | MALDI Plate           | 300.0 V                  |
| Broadband High Mass      | 2000.0 m/z | Capillary Entrance      | 4000.0 V  | Imaging Spot Diameter | 2000.0 μm                |
| Acquisition Mode         | Single MS  | Skimmer 1               | 20.0 V    | Calibration Date      | Mon Sep 19 06:39:58      |
| Pulse Program            | basic      | Drying Gas Temperature  | 180.0 °C  | Data Acquisition Size | 101072                   |
| Source Accumulation      | 0.0 sec    | Drying Gas Flow Rate    | 4.0 L/min | Apodization           | Sine-Bell Multiplication |
| Ion Accumulation Time    | 0.0 sec    | Nebulizer Gas Flow Rate | 1.0 L/min |                       |                          |
| Flight Time to Acq. Cell | 0.0 sec    |                         |           |                       |                          |

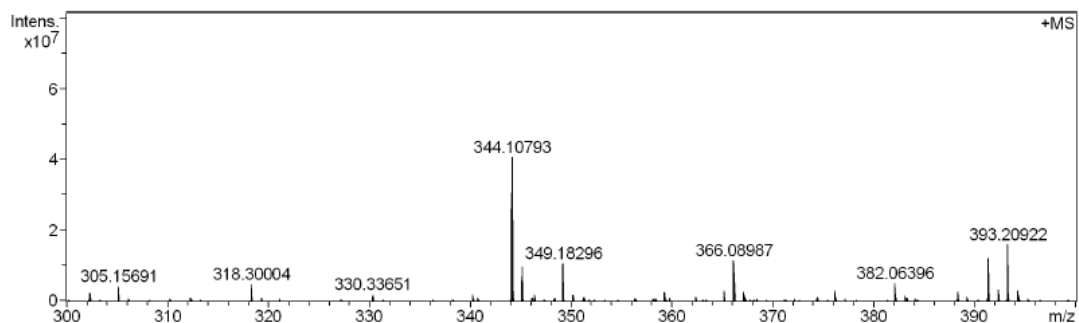

| Meas. m/z | # | Formula             | Score  | m/z       | err [mDa] | err [ppm] | mSigma | rdb  | ej*  | Conf | N-Rule |
|-----------|---|---------------------|--------|-----------|-----------|-----------|--------|------|------|------|--------|
| 344.10793 | 1 | C 22 H 15 F N O 2   | 100.00 | 344.10813 | 0.2       | 0.6       | 3.9    | 15.5 | even |      | ok     |
|           | 2 | C 19 H 16 F 2 N O 3 | 40.10  | 344.10928 | 1.3       | 3.9       | 19.9   | 11.5 | even |      | ok     |
|           | 3 | C 17 H 15 F N 3 O 4 | 3.75   | 344.10411 | -3.8      | -11.1     | 28.1   | 11.5 | even |      | ok     |
|           | 4 | C 16 H 15 F N 5 O 3 | 0.01   | 344.11534 | 7.4       | 21.6      | 30.1   | 11.5 | even |      | ok     |
|           | 5 | C 16 H 17 F 3 N O 4 | 10.87  | 344.11042 | 2.5       | 7.2       | 38.6   | 7.5  | even |      | ok     |

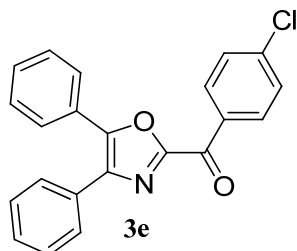

Chemical Formula: C<sub>22</sub>H<sub>14</sub>ClNO<sub>2</sub>  
 Molecular Weight: 359.81

**Acquisition Parameter**

|                          |            |                         |           |                       |                          |
|--------------------------|------------|-------------------------|-----------|-----------------------|--------------------------|
| Polarity                 | Positive   | Source                  | ESI       | No. of Laser Shots    | 20                       |
| Averaged Scans           | 4          | No. of Cell Fills       | 1         | Laser Power           | 51.0 %                   |
| Broadband Low Mass       | 100.3 m/z  | End Plate               | 3500.0 V  | MALDI Plate           | 300.0 V                  |
| Broadband High Mass      | 2000.0 m/z | Capillary Entrance      | 4000.0 V  | Imaging Spot Diameter | 2000.0 μm                |
| Acquisition Mode         | Single MS  | Skimmer 1               | 20.0 V    |                       |                          |
| Pulse Program            | basic      | Drying Gas Temperature  | 180.0 °C  | Calibration Date      | Mon Sep 19 06:39:58      |
| Source Accumulation      | 0.0 sec    | Drying Gas Flow Rate    | 4.0 L/min | Data Acquisition Size | 101072                   |
| Ion Accumulation Time    | 0.0 sec    | Nebulizer Gas Flow Rate | 1.0 L/min | Apodization           | Sine-Bell Multiplication |
| Flight Time to Acq. Cell | 0.0 sec    |                         |           |                       |                          |

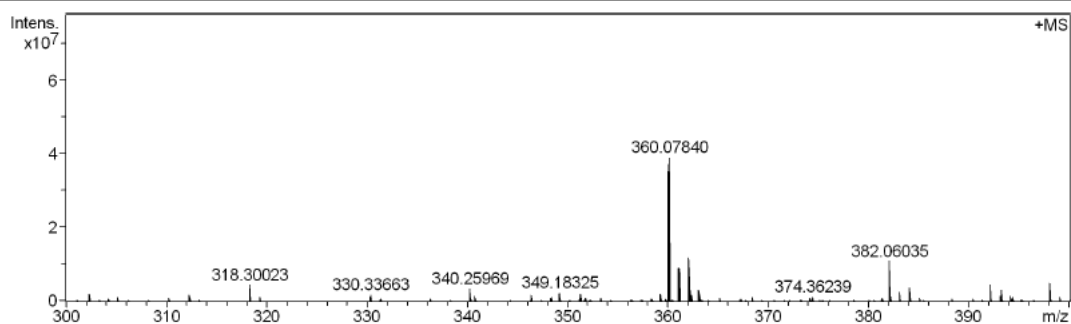

| Meas. m/z | # | Formula                                                                       | Score  | m/z       | err [mDa] | err [ppm] | mSigma | rdb  | e <sub>j</sub> | Conf | N-Rule |
|-----------|---|-------------------------------------------------------------------------------|--------|-----------|-----------|-----------|--------|------|----------------|------|--------|
| 360.07840 | 1 | C <sub>22</sub> H <sub>15</sub> ClNO <sub>2</sub>                             | 100.00 | 360.07858 | 0.2       | 0.5       | 21.5   | 15.5 | even           | ok   |        |
|           | 2 | C <sub>17</sub> H <sub>15</sub> ClN <sub>3</sub> O <sub>4</sub>               | 5.31   | 360.07456 | -3.8      | -10.7     | 26.0   | 11.5 | even           | ok   |        |
|           | 3 | C <sub>16</sub> H <sub>15</sub> ClN <sub>5</sub> O <sub>3</sub>               | 0.02   | 360.08579 | 7.4       | 20.5      | 26.4   | 11.5 | even           | ok   |        |
|           | 4 | C <sub>15</sub> H <sub>19</sub> ClNO <sub>7</sub>                             | 0.18   | 360.08446 | 6.1       | 16.8      | 37.0   | 6.5  | even           | ok   |        |
|           | 5 | C <sub>15</sub> H <sub>20</sub> Cl <sub>2</sub> N <sub>3</sub> O <sub>3</sub> | 0.00   | 360.08762 | 9.2       | 25.6      | 153.8  | 6.5  | even           | ok   |        |
|           | 6 | C <sub>16</sub> H <sub>20</sub> Cl <sub>2</sub> N <sub>4</sub> O <sub>4</sub> | 0.10   | 360.07639 | -2.0      | -5.6      | 154.9  | 6.5  | even           | ok   |        |



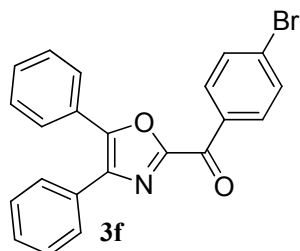

Chemical Formula:  $C_{22}H_{14}BrNO_2$   
 Molecular Weight: 404.26

#### Acquisition Parameter

|                          |            |                         |           |                       |                          |
|--------------------------|------------|-------------------------|-----------|-----------------------|--------------------------|
| Polarity                 | Positive   | Source                  | ESI       | No. of Laser Shots    | 20                       |
| Averaged Scans           | 4          | No. of Cell Fills       | 1         | Laser Power           | 51.0 %                   |
| Broadband Low Mass       | 100.3 m/z  | End Plate               | 3500.0 V  | MALDI Plate           | 300.0 V                  |
| Broadband High Mass      | 2000.0 m/z | Capillary Entrance      | 4000.0 V  | Imaging Spot Diameter | 2000.0 $\mu$ m           |
| Acquisition Mode         | Single MS  | Skimmer 1               | 20.0 V    | Calibration Date      | Mon Sep 19 06:39:58      |
| Pulse Program            | basic      | Drying Gas Temperature  | 180.0 °C  | Data Acquisition Size | 201072                   |
| Source Accumulation      | 0.0 sec    | Drying Gas Flow Rate    | 4.0 L/min | Apodization           | Sine-Bell Multiplication |
| Ion Accumulation Time    | 0.0 sec    | Nebulizer Gas Flow Rate | 1.0 L/min |                       |                          |
| Flight Time to Acq. Cell | 0.0 sec    |                         |           |                       |                          |

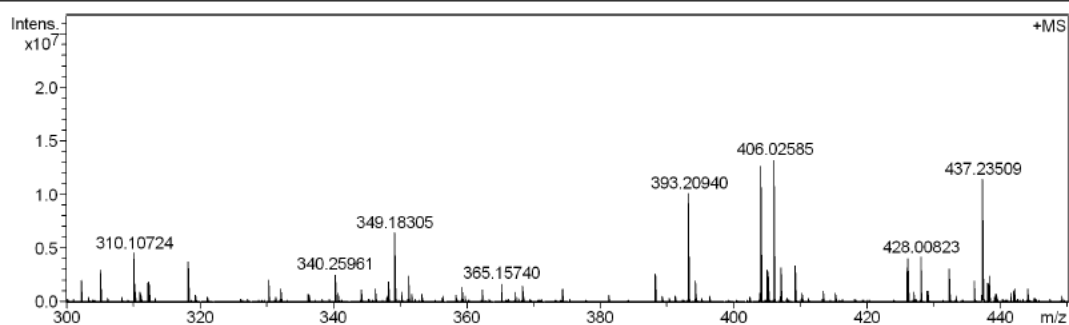

| Meas. m/z | # | Formula              | Score  | m/z       | err [mDa] | err [ppm] | mSigma | rdb  | ej%  | Conf | N-Rule |
|-----------|---|----------------------|--------|-----------|-----------|-----------|--------|------|------|------|--------|
| 404.02773 | 1 | C 22 H 15 Br N O 2   | 100.00 | 404.02807 | 0.3       | 0.8       | 14.4   | 15.5 | even | ok   | ok     |
|           | 2 | C 17 H 15 Br N 3 O 4 | 5.13   | 404.02405 | -3.7      | -9.1      | 31.7   | 11.5 | even | ok   | ok     |
|           | 3 | C 16 H 15 Br N 5 O 3 | 0.01   | 404.03528 | 7.5       | 18.7      | 33.8   | 11.5 | even | ok   | ok     |
|           | 4 | C 15 H 19 Br N O 7   | 0.10   | 404.03394 | 6.2       | 15.4      | 48.0   | 6.5  | even | ok   | ok     |

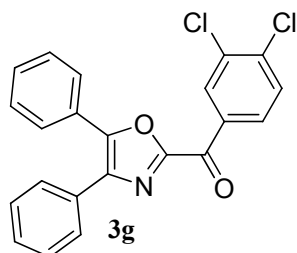

Chemical Formula: C<sub>22</sub>H<sub>13</sub>Cl<sub>2</sub>NO<sub>2</sub>  
 Molecular Weight: 394.25

#### Acquisition Parameter

|                          |            |                         |           |                       |                          |
|--------------------------|------------|-------------------------|-----------|-----------------------|--------------------------|
| Polarity                 | Positive   | Source                  | ESI       | No. of Laser Shots    | 20                       |
| Averaged Scans           | 4          | No. of Cell Fills       | 1         | Laser Power           | 51.0 %                   |
| Broadband Low Mass       | 100.3 m/z  | End Plate               | 3500.0 V  | MALDI Plate           | 300.0 V                  |
| Broadband High Mass      | 2000.0 m/z | Capillary Entrance      | 4000.0 V  | Imaging Spot Diameter | 2000.0 μm                |
| Acquisition Mode         | Single MS  | Skimmer 1               | 20.0 V    |                       |                          |
| Pulse Program            | basic      | Drying Gas Temperature  | 180.0 °C  | Calibration Date      | Mon Sep 19 06:39:58      |
| Source Accumulation      | 0.0 sec    | Drying Gas Flow Rate    | 4.0 L/min | Data Acquisition Size | 201072                   |
| Ion Accumulation Time    | 0.0 sec    | Nebulizer Gas Flow Rate | 1.0 L/min | Apodization           | Sine-Bell Multiplication |
| Flight Time to Acq. Cell | 0.0 sec    |                         |           |                       |                          |

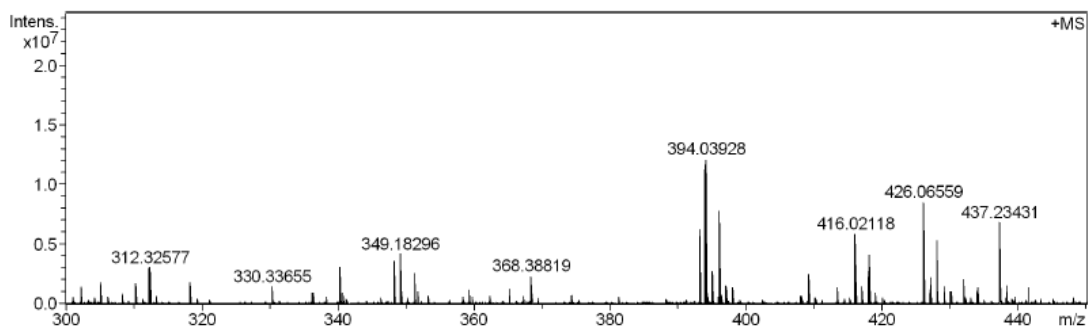

| Meas. m/z | # | Formula                                                         | Score  | m/z       | err [mDa] | err [ppm] | mSigma | rdb  | ej*Conf | N-Rule |
|-----------|---|-----------------------------------------------------------------|--------|-----------|-----------|-----------|--------|------|---------|--------|
| 394.03928 | 1 | C <sub>22</sub> H <sub>14</sub> Cl <sub>2</sub> NO <sub>2</sub> | 100.00 | 394.03961 | 0.3       | 0.8       | 16.9   | 15.5 | even    | ok     |

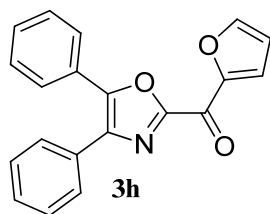

Chemical Formula: C<sub>20</sub>H<sub>13</sub>NO<sub>3</sub>  
 Molecular Weight: 315.32

**Acquisition Parameter**

|                          |            |                         |           |                       |                          |
|--------------------------|------------|-------------------------|-----------|-----------------------|--------------------------|
| Polarity                 | Positive   | Source                  | ESI       | No. of Laser Shots    | 20                       |
| Averaged Scans           | 4          | No. of Cell Fills       | 1         | Laser Power           | 51.0 %                   |
| Broadband Low Mass       | 100.3 m/z  | End Plate               | 3500.0 V  | MALDI Plate           | 300.0 V                  |
| Broadband High Mass      | 2000.0 m/z | Capillary Entrance      | 4000.0 V  | Imaging Spot Diameter | 2000.0 μm                |
| Acquisition Mode         | Single MS  | Skimmer 1               | 20.0 V    | Calibration Date      | Mon Sep 19 06:39:58      |
| Pulse Program            | basic      | Drying Gas Temperature  | 180.0 °C  | Data Acquisition Size | 101072                   |
| Source Accumulation      | 0.0 sec    | Drying Gas Flow Rate    | 4.0 L/min | Apodization           | Sine-Bell Multiplication |
| Ion Accumulation Time    | 0.0 sec    | Nebulizer Gas Flow Rate | 1.0 L/min |                       |                          |
| Flight Time to Acq. Cell | 0.0 sec    |                         |           |                       |                          |

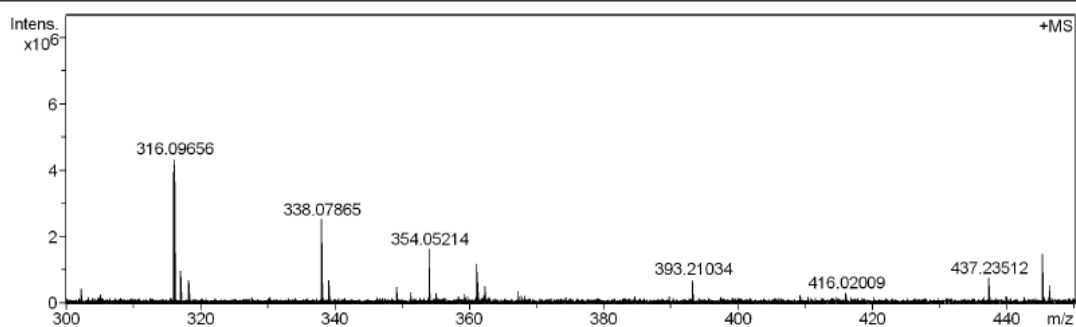

| Meas. m/z | # | Formula           | Score  | m/z       | err [mDa] | err [ppm] | mSigma | rdb  | e <sub>i</sub> Conf | N-Rule |
|-----------|---|-------------------|--------|-----------|-----------|-----------|--------|------|---------------------|--------|
| 316.09656 | 1 | C 20 H 14 N O 3   | 100.00 | 316.09682 | 0.3       | 0.8       | 17.6   | 14.5 | even                | ok     |
|           | 2 | C 15 H 14 N 3 O 5 | 4.46   | 316.09280 | -3.8      | -11.9     | 35.1   | 10.5 | even                | ok     |
|           | 3 | C 16 H 15 N 2 O 5 | 0.00   | 315.09755 | 4.1       | 13.1      | 105.2  | 10.5 | even                | ok     |
|           | 4 | C 18 H 11 N 4 O 2 | 0.00   | 315.08765 | -6.0      | -18.9     | 121.8  | 15.5 | even                | ok     |
|           | 5 | C 19 H 12 N 3 O 2 | 0.00   | 314.09240 | 1.7       | 5.2       | 126.0  | 15.5 | even                | ok     |
|           | 6 | C 20 H 12 N O 3   | 0.00   | 314.08117 | -9.3      | -29.5     | 128.1  | 15.5 | even                | ok     |

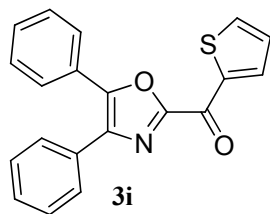

Chemical Formula: C<sub>20</sub>H<sub>13</sub>NO<sub>2</sub>S  
 Molecular Weight: 331.39

**Acquisition Parameter**

|                          |            |                         |           |                       |                          |
|--------------------------|------------|-------------------------|-----------|-----------------------|--------------------------|
| Polarity                 | Positive   | Source                  | ESI       | No. of Laser Shots    | 20                       |
| Averaged Scans           | 4          | No. of Cell Fills       | 1         | Laser Power           | 51.0 %                   |
| Broadband Low Mass       | 100.3 m/z  | End Plate               | 3500.0 V  | MALDI Plate           | 300.0 V                  |
| Broadband High Mass      | 2000.0 m/z | Capillary Entrance      | 4000.0 V  | Imaging Spot Diameter | 2000.0 μm                |
| Acquisition Mode         | Single MS  | Skimmer 1               | 20.0 V    | Calibration Date      | Mon Sep 19 06:39:58      |
| Pulse Program            | basic      | Drying Gas Temperature  | 180.0 °C  | Data Acquisition Size | 101072                   |
| Source Accumulation      | 0.0 sec    | Drying Gas Flow Rate    | 4.0 L/min | Apodization           | Sine-Bell Multiplication |
| Ion Accumulation Time    | 0.0 sec    | Nebulizer Gas Flow Rate | 1.0 L/min |                       |                          |
| Flight Time to Acq. Cell | 0.0 sec    |                         |           |                       |                          |

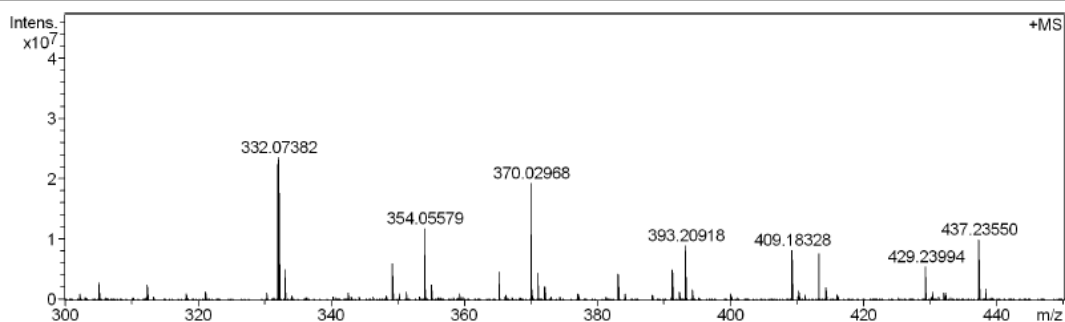

| Meas. m/z | #  | Formula                                                                      | Score  | m/z       | err [mDa] | err [ppm] | mSigma | rdb  | ej#Conf | N-Rule |
|-----------|----|------------------------------------------------------------------------------|--------|-----------|-----------|-----------|--------|------|---------|--------|
| 332.07382 | 1  | C <sub>20</sub> H <sub>14</sub> N <sub>2</sub> O <sub>2</sub> S              | 100.00 | 332.07398 | 0.2       | 0.5       | 21.9   | 14.5 | even    | ok     |
|           | 2  | C <sub>15</sub> H <sub>14</sub> N <sub>3</sub> O <sub>4</sub> S              | 5.11   | 332.06995 | -3.9      | -11.7     | 26.2   | 10.5 | even    | ok     |
|           | 3  | C <sub>14</sub> H <sub>14</sub> N <sub>5</sub> O <sub>3</sub> S              | 0.02   | 332.08119 | 7.4       | 22.2      | 26.5   | 10.5 | even    | ok     |
|           | 4  | C <sub>17</sub> H <sub>18</sub> N <sub>2</sub> O <sub>2</sub> S <sub>2</sub> | 5.01   | 332.07735 | 3.5       | 10.6      | 42.2   | 9.5  | even    | ok     |
|           | 5  | C <sub>14</sub> H <sub>22</sub> N <sub>2</sub> O <sub>2</sub> S <sub>3</sub> | 0.02   | 332.08072 | 6.9       | 20.8      | 58.2   | 4.5  | even    | ok     |
|           | 6  | C <sub>16</sub> H <sub>15</sub> N <sub>2</sub> O <sub>4</sub> S              | 0.00   | 331.07470 | 3.9       | 11.6      | 648.3  | 10.5 | even    | ok     |
|           | 7  | C <sub>14</sub> H <sub>20</sub> N <sub>4</sub> O <sub>4</sub> S <sub>2</sub> | 0.00   | 330.08283 | 6.7       | 20.1      | 681.6  | 5.5  | even    | ok     |
|           | 8  | C <sub>17</sub> H <sub>16</sub> N <sub>4</sub> O <sub>4</sub> S              | 0.00   | 330.07946 | 5.1       | 15.3      | 697.1  | 10.5 | even    | ok     |
|           | 9  | C <sub>14</sub> H <sub>12</sub> N <sub>5</sub> O <sub>3</sub> S              | 0.00   | 330.06554 | -9.6      | -28.8     | 697.8  | 11.5 | even    | ok     |
|           | 10 | C <sub>15</sub> H <sub>13</sub> N <sub>4</sub> O <sub>3</sub> S              | 0.00   | 329.07029 | -3.1      | -9.3      | 710.6  | 11.5 | even    | ok     |

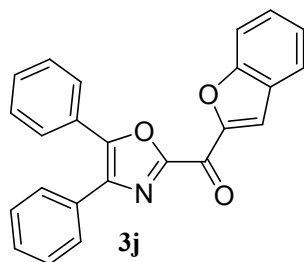

Chemical Formula: C<sub>24</sub>H<sub>15</sub>NO<sub>3</sub>  
 Molecular Weight: 365.38

**Acquisition Parameter**

|                          |            |                         |           |                       |                          |
|--------------------------|------------|-------------------------|-----------|-----------------------|--------------------------|
| Polarity                 | Positive   | Source                  | ESI       | No. of Laser Shots    | 20                       |
| Averaged Scans           | 4          | No. of Cell Fills       | 1         | Laser Power           | 51.0 %                   |
| Broadband Low Mass       | 100.3 m/z  | End Plate               | 3500.0 V  | MALDI Plate           | 300.0 V                  |
| Broadband High Mass      | 2000.0 m/z | Capillary Entrance      | 4000.0 V  | Imaging Spot Diameter | 2000.0 μm                |
| Acquisition Mode         | Single MS  | Skimmer 1               | 20.0 V    | Calibration Date      | Mon Sep 19 06:39:58      |
| Pulse Program            | basic      | Drying Gas Temperature  | 180.0 °C  | Data Acquisition Size | 101072                   |
| Source Accumulation      | 0.0 sec    | Drying Gas Flow Rate    | 4.0 L/min | Apodization           | Sine-Bell Multiplication |
| Ion Accumulation Time    | 0.0 sec    | Nebulizer Gas Flow Rate | 1.0 L/min |                       |                          |
| Flight Time to Acq. Cell | 0.0 sec    |                         |           |                       |                          |

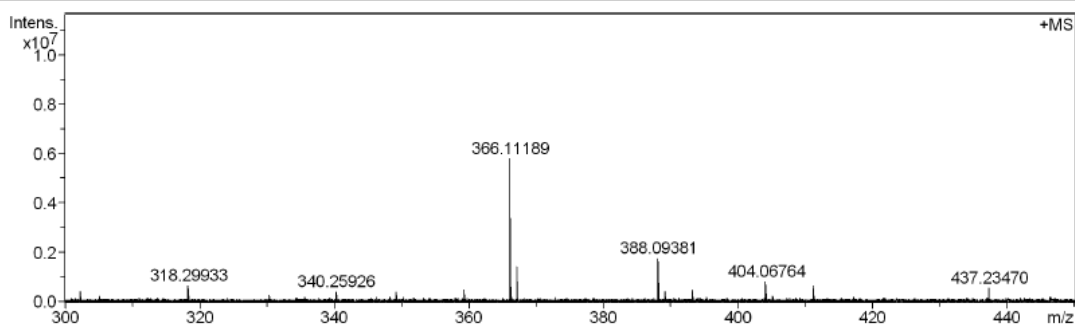

| Meas. m/z | #  | Formula                                                       | Score  | m/z       | err [mDa] | err [ppm] | mSigma | rdb  | e <sub>i</sub> Conf | N-Rule |
|-----------|----|---------------------------------------------------------------|--------|-----------|-----------|-----------|--------|------|---------------------|--------|
| 366.11189 | 1  | C <sub>24</sub> H <sub>16</sub> N <sub>1</sub> O <sub>3</sub> | 100.00 | 366.11247 | 0.6       | 1.6       | 24.0   | 17.5 | even                | ok     |
|           | 2  | C <sub>19</sub> H <sub>16</sub> N <sub>3</sub> O <sub>5</sub> | 10.29  | 366.10845 | -3.4      | -9.4      | 26.9   | 13.5 | even                | ok     |
|           | 3  | C <sub>18</sub> H <sub>16</sub> N <sub>5</sub> O <sub>4</sub> | 0.01   | 366.11968 | 7.8       | 21.3      | 27.3   | 13.5 | even                | ok     |
|           | 4  | C <sub>17</sub> H <sub>20</sub> N <sub>1</sub> O <sub>8</sub> | 0.11   | 366.11834 | 6.5       | 17.6      | 40.7   | 8.5  | even                | ok     |
|           | 5  | C <sub>20</sub> H <sub>17</sub> N <sub>2</sub> O <sub>5</sub> | 0.00   | 365.11320 | 4.5       | 12.3      | 741.4  | 13.5 | even                | ok     |
|           | 6  | C <sub>17</sub> H <sub>13</sub> N <sub>6</sub> O <sub>4</sub> | 0.00   | 365.09928 | -9.9      | -27.0     | 748.2  | 14.5 | even                | ok     |
|           | 7  | C <sub>16</sub> H <sub>13</sub> N <sub>8</sub> O <sub>3</sub> | 0.00   | 365.11051 | 1.1       | 3.0       | 749.7  | 14.5 | even                | ok     |
|           | 8  | C <sub>17</sub> H <sub>18</sub> N <sub>1</sub> O <sub>8</sub> | 0.00   | 364.10269 | -3.8      | -10.3     | 810.4  | 9.5  | even                | ok     |
|           | 9  | C <sub>16</sub> H <sub>18</sub> N <sub>3</sub> O <sub>7</sub> | 0.00   | 364.11393 | 7.2       | 19.8      | 811.2  | 9.5  | even                | ok     |
|           | 10 | C <sub>18</sub> H <sub>14</sub> N <sub>5</sub> O <sub>4</sub> | 0.00   | 364.10403 | -2.6      | -7.1      | 813.8  | 14.5 | even                | ok     |
|           | 11 | C <sub>17</sub> H <sub>14</sub> N <sub>7</sub> O <sub>3</sub> | 0.00   | 364.11526 | 8.3       | 22.8      | 814.7  | 14.5 | even                | ok     |
|           | 12 | C <sub>24</sub> H <sub>14</sub> N <sub>1</sub> O <sub>3</sub> | 0.00   | 364.09682 | -8.9      | -24.2     | 814.9  | 18.5 | even                | ok     |

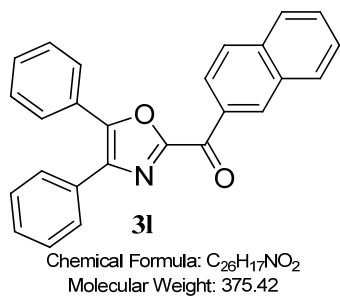

**Acquisition Parameter**

|                          |            |                         |           |                       |                          |
|--------------------------|------------|-------------------------|-----------|-----------------------|--------------------------|
| Polarity                 | Positive   | Source                  | ESI       | No. of Laser Shots    | 20                       |
| Averaged Scans           | 4          | No. of Cell Fills       | 1         | Laser Power           | 51.0 %                   |
| Broadband Low Mass       | 100.3 m/z  | End Plate               | 3500.0 V  | MALDI Plate           | 300.0 V                  |
| Broadband High Mass      | 2000.0 m/z | Capillary Entrance      | 4000.0 V  | Imaging Spot Diameter | 2000.0 μm                |
| Acquisition Mode         | Single MS  | Skimmer 1               | 20.0 V    | Calibration Date      | Mon Sep 19 06:39:58      |
| Pulse Program            | basic      | Drying Gas Temperature  | 180.0 °C  | Data Acquisition Size | 181072                   |
| Source Accumulation      | 0.0 sec    | Drying Gas Flow Rate    | 4.0 L/min | Apodization           | Sine-Bell Multiplication |
| Ion Accumulation Time    | 0.0 sec    | Nebulizer Gas Flow Rate | 1.0 L/min |                       |                          |
| Flight Time to Acq. Cell | 0.0 sec    |                         |           |                       |                          |

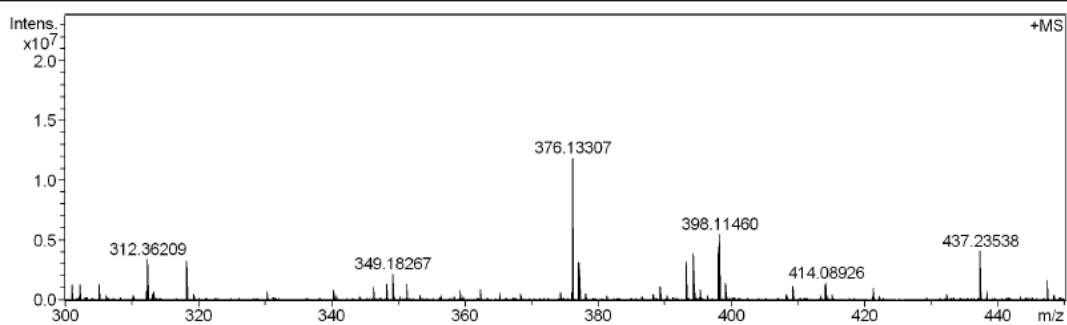

| Meas. m/z | # | Formula                                         | Score  | m/z       | err [mDa] | err [ppm] | mSigma | rdb  | e <sub>i</sub> Conf | N-Rule |
|-----------|---|-------------------------------------------------|--------|-----------|-----------|-----------|--------|------|---------------------|--------|
| 376.13307 | 1 | C <sub>26</sub> H <sub>18</sub> NO <sub>2</sub> | 100.00 | 376.13321 | 0.1       | 0.3       | 10.4   | 18.5 | even                | ok     |

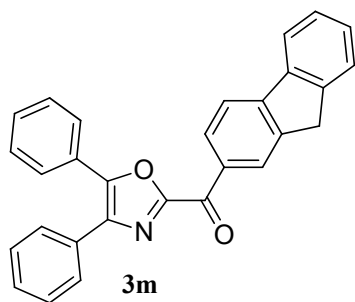

Chemical Formula: C<sub>29</sub>H<sub>19</sub>NO<sub>2</sub>  
 Molecular Weight: 413.47

**Acquisition Parameter**

|                          |            |                         |           |                       |                          |
|--------------------------|------------|-------------------------|-----------|-----------------------|--------------------------|
| Polarity                 | Positive   | Source                  | ESI       | No. of Laser Shots    | 20                       |
| Averaged Scans           | 4          | No. of Cell Fills       | 1         | Laser Power           | 51.0 %                   |
| Broadband Low Mass       | 100.3 m/z  | End Plate               | 3500.0 V  | MALDI Plate           | 300.0 V                  |
| Broadband High Mass      | 2000.0 m/z | Capillary Entrance      | 4000.0 V  | Imaging Spot Diameter | 2000.0 μm                |
| Acquisition Mode         | Single MS  | Skimmer 1               | 20.0 V    | Calibration Date      | Mon Sep 19 06:39:58      |
| Pulse Program            | basic      | Drying Gas Temperature  | 180.0 °C  | Data Acquisition Size | 101072                   |
| Source Accumulation      | 0.0 sec    | Drying Gas Flow Rate    | 4.0 L/min | Apodization           | Sine-Bell Multiplication |
| Ion Accumulation Time    | 0.0 sec    | Nebulizer Gas Flow Rate | 1.0 L/min |                       |                          |
| Flight Time to Acq. Cell | 0.0 sec    |                         |           |                       |                          |

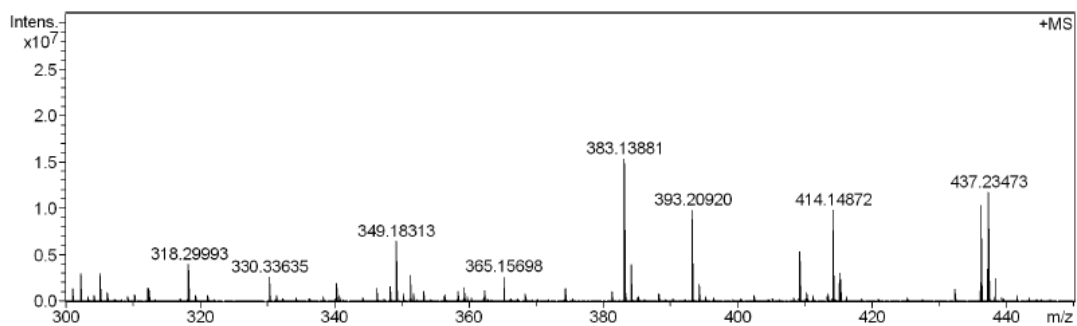

| Meas. m/z | # | Formula                                                       | Score  | m/z       | err [mDa] | err [ppm] | mSigma | rdb  | ej*Conf | N-Rule |
|-----------|---|---------------------------------------------------------------|--------|-----------|-----------|-----------|--------|------|---------|--------|
| 414.14872 | 1 | C <sub>29</sub> H <sub>20</sub> NO <sub>2</sub>               | 100.00 | 414.14886 | 0.1       | 0.3       | 5.2    | 20.5 | even    | ok     |
|           | 2 | C <sub>24</sub> H <sub>20</sub> N <sub>3</sub> O <sub>4</sub> | 3.46   | 414.14483 | -3.9      | -9.4      | 27.6   | 16.5 | even    | ok     |
|           | 3 | C <sub>23</sub> H <sub>20</sub> N <sub>5</sub> O <sub>3</sub> | 0.02   | 414.15607 | 7.3       | 17.7      | 30.0   | 16.5 | even    | ok     |
|           | 4 | C <sub>22</sub> H <sub>24</sub> NO <sub>7</sub>               | 0.12   | 414.15473 | 6.0       | 14.5      | 43.7   | 11.5 | even    | ok     |

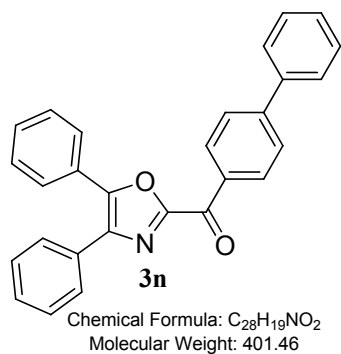

**Acquisition Parameter**

|                          |            |                         |           |                       |                          |
|--------------------------|------------|-------------------------|-----------|-----------------------|--------------------------|
| Polarity                 | Positive   | Source                  | ESI       | No. of Laser Shots    | 20                       |
| Averaged Scans           | 4          | No. of Cell Fills       | 1         | Laser Power           | 51.0 %                   |
| Broadband Low Mass       | 100.3 m/z  | End Plate               | 3500.0 V  | MALDI Plate           | 300.0 V                  |
| Broadband High Mass      | 2000.0 m/z | Capillary Entrance      | 4000.0 V  | Imaging Spot Diameter | 2000.0 μm                |
| Acquisition Mode         | Single MS  | Skimmer 1               | 20.0 V    | Calibration Date      | Mon Sep 19 06:39:58      |
| Pulse Program            | basic      | Drying Gas Temperature  | 180.0 °C  | Data Acquisition Size | 101072                   |
| Source Accumulation      | 0.0 sec    | Drying Gas Flow Rate    | 4.0 L/min | Apodization           | Sine-Bell Multiplication |
| Ion Accumulation Time    | 0.0 sec    | Nebulizer Gas Flow Rate | 1.0 L/min |                       |                          |
| Flight Time to Acq. Cell | 0.0 sec    |                         |           |                       |                          |

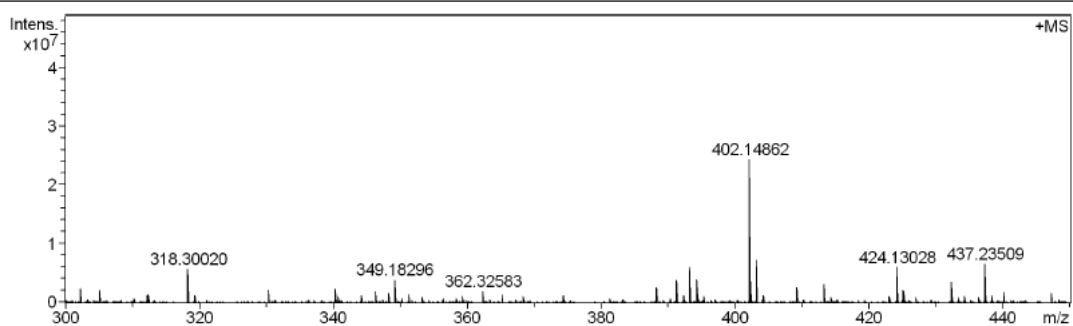

| Meas. m/z | # | Formula                                                       | Score  | m/z       | err [mDa] | err [ppm] | mSigma | rdb  | e <sub>i</sub> | Conf | N-Rule |
|-----------|---|---------------------------------------------------------------|--------|-----------|-----------|-----------|--------|------|----------------|------|--------|
| 402.14862 | 1 | C <sub>28</sub> H <sub>20</sub> N <sub>2</sub> O <sub>2</sub> | 100.00 | 402.14886 | 0.2       | 0.6       | 4.7    | 19.5 | even           |      | ok     |
|           | 2 | C <sub>23</sub> H <sub>20</sub> N <sub>3</sub> O <sub>4</sub> | 4.45   | 402.14483 | -3.8      | -9.4      | 23.1   | 15.5 | even           |      | ok     |
|           | 3 | C <sub>22</sub> H <sub>20</sub> N <sub>5</sub> O <sub>3</sub> | 0.01   | 402.15607 | 7.4       | 18.5      | 25.5   | 15.5 | even           |      | ok     |
|           | 4 | C <sub>21</sub> H <sub>24</sub> N <sub>2</sub> O <sub>7</sub> | 0.12   | 402.15473 | 6.1       | 15.2      | 39.7   | 10.5 | even           |      | ok     |



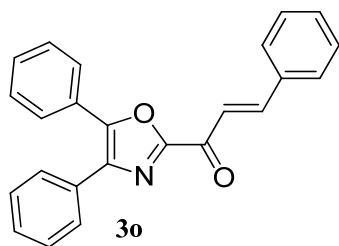

Chemical Formula: C<sub>24</sub>H<sub>17</sub>NO<sub>2</sub>  
 Molecular Weight: 351.40

**Acquisition Parameter**

|                          |            |                         |           |                       |                          |
|--------------------------|------------|-------------------------|-----------|-----------------------|--------------------------|
| Polarity                 | Positive   | Source                  | ESI       | No. of Laser Shots    | 20                       |
| Averaged Scans           | 4          | No. of Cell Fills       | 1         | Laser Power           | 51.0 %                   |
| Broadband Low Mass       | 100.3 m/z  | End Plate               | 3500.0 V  | MALDI Plate           | 300.0 V                  |
| Broadband High Mass      | 2000.0 m/z | Capillary Entrance      | 4000.0 V  | Imaging Spot Diameter | 2000.0 μm                |
| Acquisition Mode         | Single MS  | Skimmer 1               | 20.0 V    | Calibration Date      | Mon Sep 19 06:39:58      |
| Pulse Program            | basic      | Drying Gas Temperature  | 180.0 °C  | Data Acquisition Size | 201072                   |
| Source Accumulation      | 0.0 sec    | Drying Gas Flow Rate    | 4.0 L/min | Apodization           | Sine-Bell Multiplication |
| Ion Accumulation Time    | 0.0 sec    | Nebulizer Gas Flow Rate | 1.0 L/min |                       |                          |
| Flight Time to Acq. Cell | 0.0 sec    |                         |           |                       |                          |

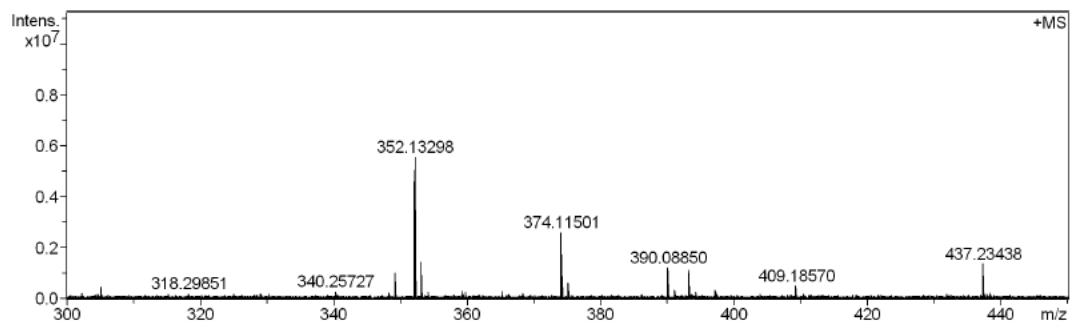

| Meas. m/z | # | Formula                                                       | Score  | m/z       | err [mDa] | err [ppm] | mSigma | rdb  | ej   | Conf | N-Rule |
|-----------|---|---------------------------------------------------------------|--------|-----------|-----------|-----------|--------|------|------|------|--------|
| 352.13298 | 1 | C <sub>24</sub> H <sub>18</sub> N <sub>2</sub> O <sub>2</sub> | 100.00 | 352.13321 | 0.2       | 0.6       | 7.8    | 16.5 | even | ok   |        |
|           | 2 | C <sub>19</sub> H <sub>18</sub> N <sub>3</sub> O <sub>4</sub> | 4.00   | 352.12918 | -3.8      | -10.8     | 29.8   | 12.5 | even | ok   |        |
|           | 3 | C <sub>18</sub> H <sub>18</sub> N <sub>5</sub> O <sub>3</sub> | 0.01   | 352.14042 | 7.4       | 21.1      | 32.2   | 12.5 | even | ok   |        |
|           | 4 | C <sub>17</sub> H <sub>22</sub> N <sub>2</sub> O <sub>7</sub> | 0.10   | 352.13908 | 6.1       | 17.3      | 45.6   | 7.5  | even | ok   |        |

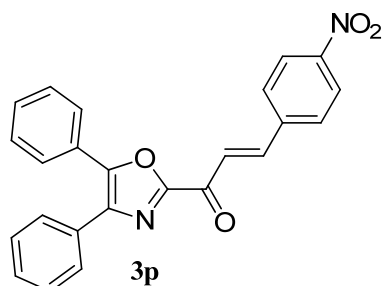

Chemical Formula: C<sub>24</sub>H<sub>18</sub>N<sub>2</sub>O<sub>4</sub>  
 Molecular Weight: 396.39

**Acquisition Parameter**

|                          |            |                         |           |                       |                          |
|--------------------------|------------|-------------------------|-----------|-----------------------|--------------------------|
| Polarity                 | Positive   | Source                  | ESI       | No. of Laser Shots    | 20                       |
| Averaged Scans           | 4          | No. of Cell Fills       | 1         | Laser Power           | 51.0 %                   |
| Broadband Low Mass       | 100.3 m/z  | End Plate               | 3500.0 V  | MALDI Plate           | 300.0 V                  |
| Broadband High Mass      | 2000.0 m/z | Capillary Entrance      | 4000.0 V  | Imaging Spot Diameter | 2000.0 μm                |
| Acquisition Mode         | Single MS  | Skimmer 1               | 20.0 V    | Calibration Date      | Mon Sep 19 06:39:58      |
| Pulse Program            | basic      | Drying Gas Temperature  | 180.0 °C  | Data Acquisition Size | 101072                   |
| Source Accumulation      | 0.0 sec    | Drying Gas Flow Rate    | 4.0 L/min | Apodization           | Sine-Bell Multiplication |
| Ion Accumulation Time    | 0.1 sec    | Nebulizer Gas Flow Rate | 1.0 L/min |                       |                          |
| Flight Time to Acq. Cell | 0.0 sec    |                         |           |                       |                          |

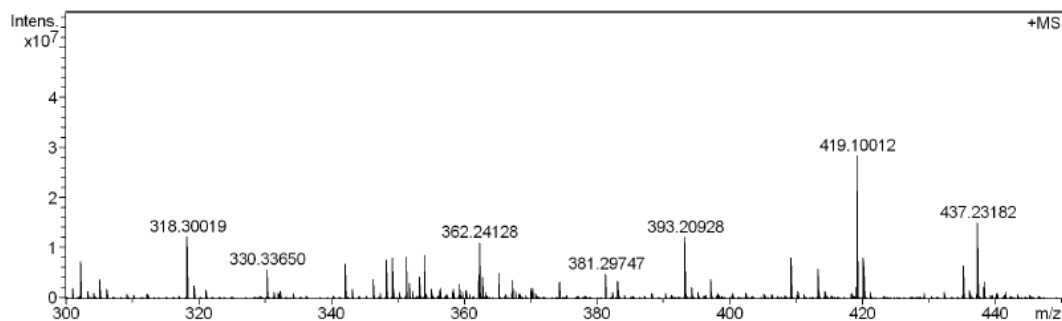

| Meas. m/z | # | Formula                                                       | Score  | m/z       | err [mDa] | err [ppm] | mSigma | rdb  | e <sup>-</sup> Conf | N-Rule |
|-----------|---|---------------------------------------------------------------|--------|-----------|-----------|-----------|--------|------|---------------------|--------|
| 397.11771 | 1 | C <sub>24</sub> H <sub>17</sub> N <sub>2</sub> O <sub>4</sub> | 100.00 | 397.11828 | 0.6       | 1.4       | 27.0   | 17.5 | even                | ok     |

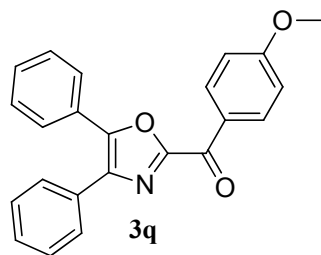

Chemical Formula: C<sub>23</sub>H<sub>17</sub>NO<sub>3</sub>  
 Molecular Weight: 355.39

**Acquisition Parameter**

|                          |            |                         |           |                       |                          |
|--------------------------|------------|-------------------------|-----------|-----------------------|--------------------------|
| Polarity                 | Positive   | Source                  | ESI       | No. of Laser Shots    | 20                       |
| Averaged Scans           | 4          | No. of Cell Fills       | 1         | Laser Power           | 51.0 %                   |
| Broadband Low Mass       | 100.3 m/z  | End Plate               | 3500.0 V  | MALDI Plate           | 300.0 V                  |
| Broadband High Mass      | 2000.0 m/z | Capillary Entrance      | 4000.0 V  | Imaging Spot Diameter | 2000.0 μm                |
| Acquisition Mode         | Single MS  | Skimmer 1               | 20.0 V    |                       |                          |
| Pulse Program            | basic      | Drying Gas Temperature  | 180.0 °C  | Calibration Date      | Mon Sep 19 06:39:58      |
| Source Accumulation      | 0.0 sec    | Drying Gas Flow Rate    | 4.0 L/min | Data Acquisition Size | 101072                   |
| Ion Accumulation Time    | 0.0 sec    | Nebulizer Gas Flow Rate | 1.0 L/min | Apodization           | Sine-Bell Multiplication |
| Flight Time to Acq. Cell | 0.0 sec    |                         |           |                       |                          |

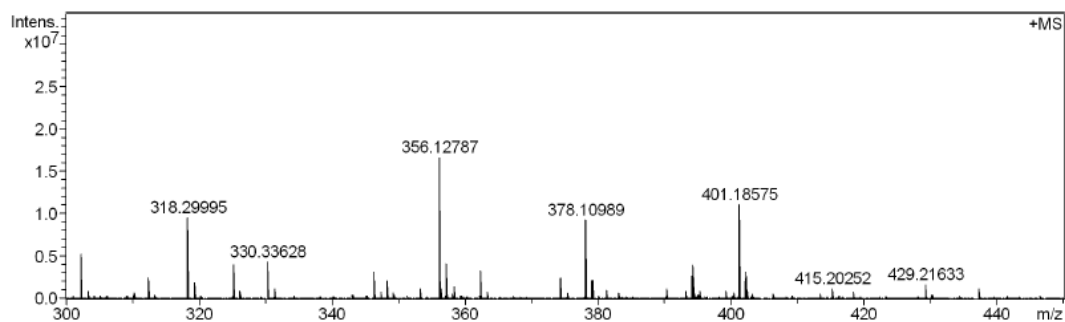

| Meas. m/z | # | Formula                                                       | Score  | m/z       | err [mDa] | err [ppm] | mSigma | rdb  | ej*Conf | N-Rule |
|-----------|---|---------------------------------------------------------------|--------|-----------|-----------|-----------|--------|------|---------|--------|
| 356.12787 | 1 | C <sub>23</sub> H <sub>18</sub> N <sub>1</sub> O <sub>3</sub> | 100.00 | 356.12812 | 0.3       | 0.7       | 0.7    | 15.5 | even    | ok     |
|           | 2 | C <sub>18</sub> H <sub>18</sub> N <sub>3</sub> O <sub>5</sub> | 3.96   | 356.12410 | -3.8      | -10.6     | 26.7   | 11.5 | even    | ok     |
|           | 3 | C <sub>17</sub> H <sub>18</sub> N <sub>5</sub> O <sub>4</sub> | 0.01   | 356.13533 | 7.5       | 21.0      | 28.9   | 11.5 | even    | ok     |
|           | 4 | C <sub>16</sub> H <sub>22</sub> N <sub>1</sub> O <sub>8</sub> | 0.10   | 356.13399 | 6.1       | 17.2      | 43.3   | 6.5  | even    | ok     |

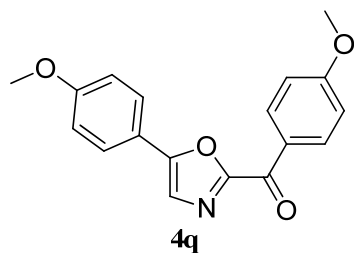

Chemical Formula: C<sub>18</sub>H<sub>15</sub>NO<sub>4</sub>  
 Molecular Weight: 309.32

**Acquisition Parameter**

|                          |            |                         |           |                       |                          |
|--------------------------|------------|-------------------------|-----------|-----------------------|--------------------------|
| Polarity                 | Positive   | Source                  | ESI       | No. of Laser Shots    | 20                       |
| Averaged Scans           | 4          | No. of Cell Fills       | 1         | Laser Power           | 51.0 %                   |
| Broadband Low Mass       | 100.3 m/z  | End Plate               | 3500.0 V  | MALDI Plate           | 300.0 V                  |
| Broadband High Mass      | 2000.0 m/z | Capillary Entrance      | 4000.0 V  | Imaging Spot Diameter | 2000.0 μm                |
| Acquisition Mode         | Single MS  | Skimmer 1               | 20.0 V    |                       |                          |
| Pulse Program            | basic      | Drying Gas Temperature  | 180.0 °C  | Calibration Date      | Mon Sep 19 06:39:58      |
| Source Accumulation      | 0.0 sec    | Drying Gas Flow Rate    | 4.0 L/min | Data Acquisition Size | 201072                   |
| Ion Accumulation Time    | 0.0 sec    | Nebulizer Gas Flow Rate | 1.0 L/min | Apodization           | Sine-Bell Multiplication |
| Flight Time to Acq. Cell | 0.0 sec    |                         |           |                       |                          |

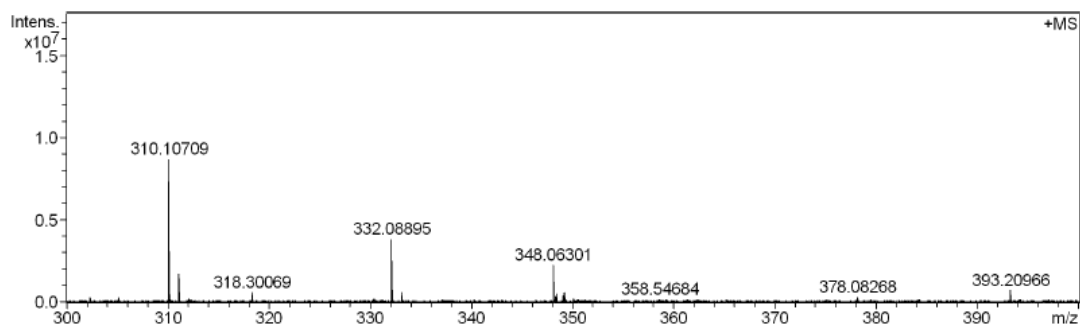

| Meas. m/z | # | Formula                                                       | Score  | m/z       | err [mDa] | err [ppm] | mSigma | rdb  | ej   | Conf | N-Rule |
|-----------|---|---------------------------------------------------------------|--------|-----------|-----------|-----------|--------|------|------|------|--------|
| 310.10709 | 1 | C <sub>18</sub> H <sub>16</sub> N <sub>1</sub> O <sub>4</sub> | 100.00 | 310.10738 | 0.3       | 1.0       | 1.6    | 11.5 | even |      | ok     |
|           | 2 | C <sub>13</sub> H <sub>16</sub> N <sub>3</sub> O <sub>6</sub> | 4.13   | 310.10336 | -3.7      | -12.0     | 28.4   | 7.5  | even |      | ok     |
|           | 3 | C <sub>12</sub> H <sub>16</sub> N <sub>5</sub> O <sub>5</sub> | 0.01   | 310.11460 | 7.5       | 24.2      | 30.6   | 7.5  | even |      | ok     |
|           | 4 | C <sub>12</sub> H <sub>14</sub> N <sub>5</sub> O <sub>5</sub> | 0.00   | 308.09895 | -3.4      | -11.0     | 86.4   | 8.5  | even |      | ok     |
|           | 5 | C <sub>14</sub> H <sub>17</sub> N <sub>2</sub> O <sub>6</sub> | 0.00   | 309.10811 | 4.1       | 13.3      | 92.7   | 7.5  | even |      | ok     |
|           | 6 | C <sub>18</sub> H <sub>14</sub> N <sub>1</sub> O <sub>4</sub> | 0.00   | 308.09173 | -9.5      | -30.7     | 115.6  | 12.5 | even |      | ok     |

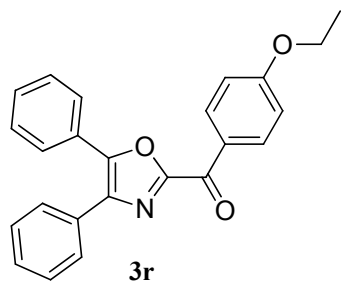

Chemical Formula: C<sub>24</sub>H<sub>19</sub>NO<sub>3</sub>  
 Molecular Weight: 369.41

**Acquisition Parameter**

|                          |            |                         |           |                       |                          |
|--------------------------|------------|-------------------------|-----------|-----------------------|--------------------------|
| Polarity                 | Positive   | Source                  | ESI       | No. of Laser Shots    | 20                       |
| Averaged Scans           | 4          | No. of Cell Fills       | 1         | Laser Power           | 51.0 %                   |
| Broadband Low Mass       | 100.3 m/z  | End Plate               | 3500.0 V  | MALDI Plate           | 300.0 V                  |
| Broadband High Mass      | 2000.0 m/z | Capillary Entrance      | 4000.0 V  | Imaging Spot Diameter | 2000.0 μm                |
| Acquisition Mode         | Single MS  | Skimmer 1               | 20.0 V    | Calibration Date      | Mon Sep 19 06:39:58      |
| Pulse Program            | basic      | Drying Gas Temperature  | 180.0 °C  | Data Acquisition Size | 201072                   |
| Source Accumulation      | 0.0 sec    | Drying Gas Flow Rate    | 4.0 L/min | Apodization           | Sine-Bell Multiplication |
| Ion Accumulation Time    | 0.0 sec    | Nebulizer Gas Flow Rate | 1.0 L/min |                       |                          |
| Flight Time to Acq. Cell | 0.0 sec    |                         |           |                       |                          |

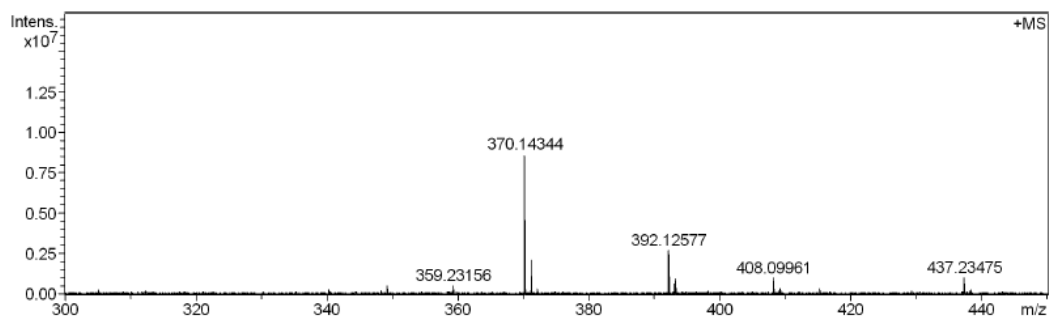

| Meas. m/z | # | Formula                                                       | Score  | m/z       | err [mDa] | err [ppm] | mSigma | rdb  | ej*Conf | N-Rule |
|-----------|---|---------------------------------------------------------------|--------|-----------|-----------|-----------|--------|------|---------|--------|
| 370.14344 | 1 | C <sub>24</sub> H <sub>20</sub> N <sub>3</sub> O <sub>3</sub> | 100.00 | 370.14377 | 0.3       | 0.9       | 8.5    | 15.5 | even    | ok     |
|           | 2 | C <sub>19</sub> H <sub>20</sub> N <sub>3</sub> O <sub>5</sub> | 5.91   | 370.13975 | -3.7      | -10.0     | 20.1   | 11.5 | even    | ok     |
|           | 3 | C <sub>18</sub> H <sub>20</sub> N <sub>5</sub> O <sub>4</sub> | 0.01   | 370.15098 | 7.5       | 20.4      | 22.6   | 11.5 | even    | ok     |
|           | 4 | C <sub>17</sub> H <sub>24</sub> N <sub>3</sub> O <sub>8</sub> | 0.12   | 370.14964 | 6.2       | 16.8      | 36.3   | 6.5  | even    | ok     |

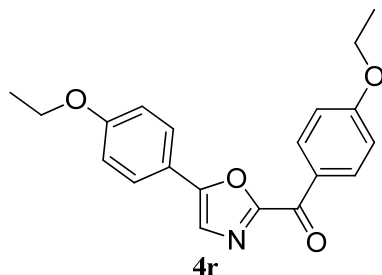

Chemical Formula: C<sub>20</sub>H<sub>19</sub>NO<sub>4</sub>  
 Molecular Weight: 337.37

**Acquisition Parameter**

|                          |            |                         |           |                       |                          |
|--------------------------|------------|-------------------------|-----------|-----------------------|--------------------------|
| Polarity                 | Positive   | Source                  | ESI       | No. of Laser Shots    | 20                       |
| Averaged Scans           | 4          | No. of Cell Fills       | 1         | Laser Power           | 51.0 %                   |
| Broadband Low Mass       | 100.3 m/z  | End Plate               | 3500.0 V  | MALDI Plate           | 300.0 V                  |
| Broadband High Mass      | 2000.0 m/z | Capillary Entrance      | 4000.0 V  | Imaging Spot Diameter | 2000.0 µm                |
| Acquisition Mode         | Single MS  | Skimmer 1               | 20.0 V    |                       |                          |
| Pulse Program            | basic      | Drying Gas Temperature  | 180.0 °C  | Calibration Date      | Mon Sep 19 06:39:58      |
| Source Accumulation      | 0.0 sec    | Drying Gas Flow Rate    | 4.0 L/min | Data Acquisition Size | 101072                   |
| Ion Accumulation Time    | 0.0 sec    | Nebulizer Gas Flow Rate | 1.0 L/min | Apodization           | Sine-Bell Multiplication |
| Flight Time to Acq. Cell | 0.0 sec    |                         |           |                       |                          |

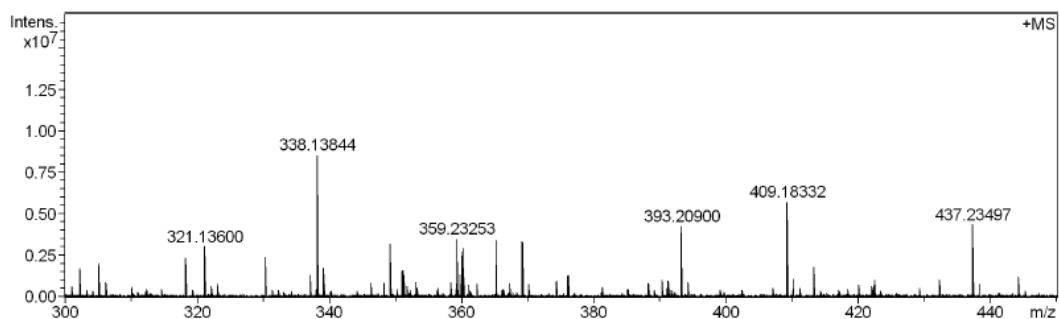

| Meas. m/z | # | Formula                                                       | Score  | m/z       | err [mDa] | err [ppm] | mSigma | rdb  | ejConf | N-Rule |
|-----------|---|---------------------------------------------------------------|--------|-----------|-----------|-----------|--------|------|--------|--------|
| 338.13844 | 1 | C <sub>20</sub> H <sub>20</sub> NO <sub>4</sub>               | 100.00 | 338.13868 | 0.2       | 0.7       | 9.2    | 11.5 | even   | ok     |
|           | 2 | C <sub>15</sub> H <sub>20</sub> N <sub>3</sub> O <sub>6</sub> | 5.34   | 338.13466 | -3.8      | -11.2     | 19.3   | 7.5  | even   | ok     |
|           | 3 | C <sub>14</sub> H <sub>20</sub> N <sub>5</sub> O <sub>5</sub> | 0.02   | 338.14590 | 7.5       | 22.0      | 21.7   | 7.5  | even   | ok     |
|           | 4 | C <sub>13</sub> H <sub>24</sub> NO <sub>9</sub>               | 0.14   | 338.14456 | 6.1       | 18.1      | 35.4   | 2.5  | even   | ok     |

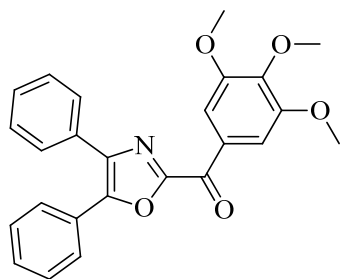

3s

Chemical Formula:  $C_{25}H_{21}NO_5$

Exact Mass: 415.14

#### Acquisition Parameter

|                          |            |                         |                    |                       |                          |
|--------------------------|------------|-------------------------|--------------------|-----------------------|--------------------------|
| Polarity                 | Positive   | Source                  | ESI                | No. of Laser Shots    | 20                       |
| Averaged Scans           | 4          | No. of Cell Fills       | 1                  | Laser Power           | 51.0 %                   |
| Broadband Low Mass       | 100.3 m/z  | End Plate               | 3500.0 V           | MALDI Plate           | 300.0 V                  |
| Broadband High Mass      | 1600.0 m/z | Capillary Entrance      | 4000.0 V           | Imaging Spot Diameter | 2000.0 $\mu$ m           |
| Acquisition Mode         | Single MS  | Skimmer 1               | 20.0 V             | Calibration Date      | Wed Dec 7 10:47:13 2011  |
| Pulse Program            | basic      | Drying Gas Temperature  | 180.0 $^{\circ}$ C | Data Acquisition Size | 131072                   |
| Source Accumulation      | 0.0 sec    | Drying Gas Flow Rate    | 4.0 L/min          | Apodization           | Sine-Bell Multiplication |
| Ion Accumulation Time    | 0.1 sec    | Nebulizer Gas Flow Rate | 1.0 L/min          |                       |                          |
| Flight Time to Acq. Cell | 0.0 sec    |                         |                    |                       |                          |

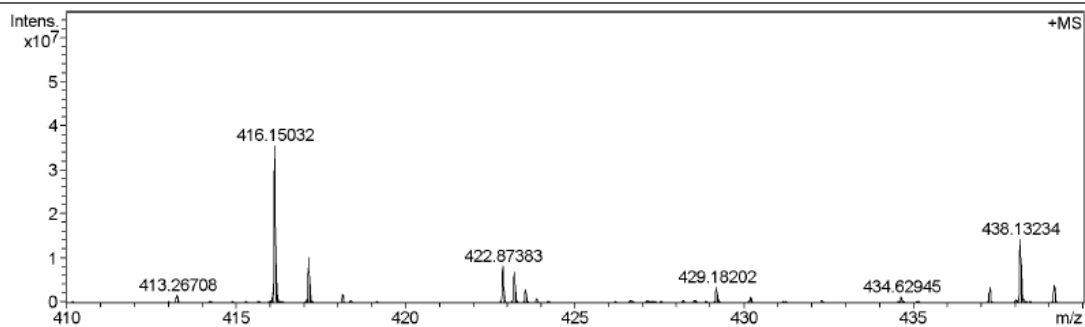

| Meas. m/z | # | Formula                                                       | Score  | m/z       | err [mDa] | err [ppm] | mSigma | rdb  | e <sup>-</sup> Conf | N-Rule |
|-----------|---|---------------------------------------------------------------|--------|-----------|-----------|-----------|--------|------|---------------------|--------|
| 416.15032 | 1 | C <sub>25</sub> H <sub>22</sub> N <sub>1</sub> O <sub>5</sub> | 100.00 | 416.14925 | -1.1      | -2.6      | 9.1    | 15.5 | even                | ok     |

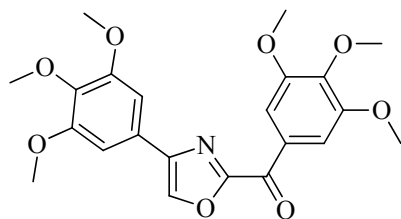

**4s**

Chemical Formula: C<sub>22</sub>H<sub>23</sub>NO<sub>8</sub>

Exact Mass: 429.14

**Acquisition Parameter**

|                          |            |                         |           |                       |                          |
|--------------------------|------------|-------------------------|-----------|-----------------------|--------------------------|
| Polarity                 | Positive   | Source                  | ESI       | No. of Laser Shots    | 20                       |
| Averaged Scans           | 4          | No. of Cell Fills       | 1         | Laser Power           | 51.0 %                   |
| Broadband Low Mass       | 100.3 m/z  | End Plate               | 3500.0 V  | MALDI Plate           | 300.0 V                  |
| Broadband High Mass      | 1600.0 m/z | Capillary Entrance      | 4000.0 V  | Imaging Spot Diameter | 2000.0 μm                |
| Acquisition Mode         | Single MS  | Skimmer 1               | 20.0 V    | Calibration Date      | Wed Dec 7 10:47:13 2011  |
| Pulse Program            | basic      | Drying Gas Temperature  | 180.0 °C  | Data Acquisition Size | 131072                   |
| Source Accumulation      | 0.0 sec    | Drying Gas Flow Rate    | 4.0 L/min | Apodization           | Sine-Bell Multiplication |
| Ion Accumulation Time    | 0.1 sec    | Nebulizer Gas Flow Rate | 1.0 L/min |                       |                          |
| Flight Time to Acq. Cell | 0.0 sec    |                         |           |                       |                          |

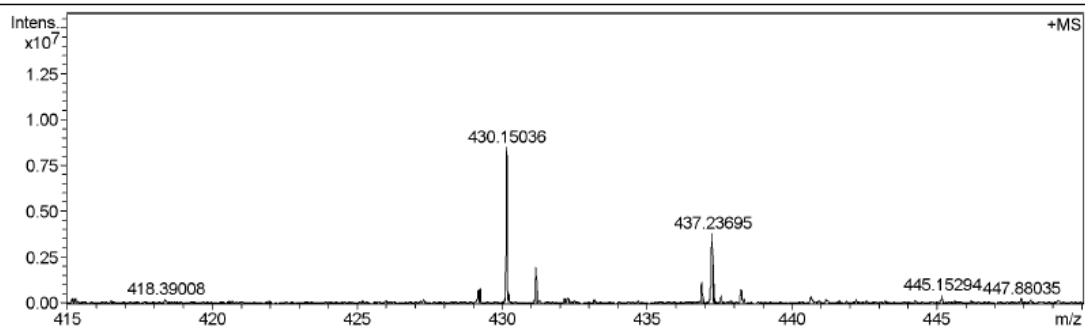

| Meas. m/z | # | Formula                                                       | Score  | m/z       | err [mDa] | err [ppm] | mSigma | rdb  | e <sup>-</sup> Conf | N-Rule |
|-----------|---|---------------------------------------------------------------|--------|-----------|-----------|-----------|--------|------|---------------------|--------|
| 430.15036 | 1 | C <sub>22</sub> H <sub>24</sub> N <sub>1</sub> O <sub>8</sub> | 100.00 | 430.14964 | -0.7      | -1.7      | 14.1   | 11.5 | even                | ok     |
|           | 2 | C <sub>23</sub> H <sub>20</sub> N <sub>5</sub> O <sub>4</sub> | 96.05  | 430.15098 | 0.6       | 1.4       | 18.6   | 16.5 | even                | ok     |
|           | 3 | C <sub>24</sub> H <sub>16</sub> N <sub>9</sub>                | 29.97  | 430.15232 | 2.0       | 4.5       | 32.9   | 21.5 | even                | ok     |
